# Supplementary material for: Immunotherapeutic effects of intratumoral nanoplexed poly I:C
Source: J Immunother Cancer. 2019 May 2;7:116. doi: 10.1186/s40425-019-0568-2 (PMC6498680; doi:10.1186/s40425-019-0568-2)
Supplement: Supplementary file 17 — Table S4. Top 30 Upstream Regulators predicted to promote the differentially expression profile induced by BO-112 intratumoral administration. Upstream Regulators from differentially expressed genes upon BO-112 intratumoral administration (selected as significant using a B > 0 cut-off) were identified by Ingenuity Pathway Analysis. (XLSX 17 kb) [file 40425_2019_568_MOESM17_ESM.xlsx]

## Sheet: Hoja1
Additional file 17. Table S4. Top 30 Upstream Regulators predicted to promote the differentially expression profile induced by BO-112 intratumoral administration.
Upstream Regulator	Molecule Type	Predicted Activation State	Activation z-score	p-value of overlap	Target molecules in dataset
poly rI:rC-RNA	biologic drug	Activated	7.571	9.04e-42	ADAR,AGRN,Apol11a (includes others),Apol7e (includes others),AXL,CCL11,Ccl2,CCL3L3,CCL5,CD274,CD47,CFB,CSF1,CXCL10,Cxcl11,CXCL3,DAXX,DHX58,DUSP1,FPR1,GADD45B,GCH1,Gzmb,HLA-A,HLA-E,IFI16,IFIH1,IFIT1B,IFIT2,IFIT3,IFITM3,IFNG,IL1A,IQGAP2,IRAK2,IRF7,ISG15,ISG20,JUNB,KLF6,LIF,Mx1/Mx2,NFKBIA,NOS2,OAS1,Oas1b,Oas1d (includes others),OAS2,OAS3,OASL,Oasl2,PARP11,RNF114,RSAD2,SLFN12L,SLPI,STAT2,TAP2,TARM1,T…
IFNAR1	transmembrane receptor	Activated	3.985	1.93e-40	ACOD1,AXL,CCL3L3,CCL5,CH25H,CLEC4D,CLEC4E,CMPK2,CSF1,CXCL10,Cxcl11,CXCL3,HLA-A,HMGCS1,IDI1,IFI16,IFI44,IFIH1,IFIT1B,IFIT2,IFIT3,IFNG,IL1A,IRF7,ISG15,LIF,Ly6a (includes others),Ms4a4b (includes others),Mx1/Mx2,NOS2,OAS1,OAS2,OAS3,OASL,Oasl2,PARP12,RSAD2,SLFN12L,TAPBPL,TNFAIP2,TNFAIP3,TNFSF10,USP18,XAF1
IRF7	transcription regulator	Activated	6.256	2.47e-38	ADAR,CASP4,Ccl2,CCL5,CCRL2,CMPK2,CXCL10,DAXX,DHX58,HELZ2,IFI16,IFI35,IFI44,IFIH1,IFIT1B,IFIT2,IFIT3,IFITM3,IRF7,ISG15,ISG20,Ly6a (includes others),Ms4a4b (includes others),Mx1/Mx2,OAS1,OAS2,OAS3,OASL,Oasl2,PARP12,PARP14,PHF11,RSAD2,SAMD9L,STAT2,TAP2,TNFSF10,Trim30a/Trim30d,TRIM5,UBA7,USP18,XAF1,ZBP1
IRF3	transcription regulator	Activated	5.529	4.3e-38	ADAR,APOBEC3B,Ccl2,CCL3L3,CCL5,CCRL2,CD274,CMPK2,CXCL10,Cxcl11,DAXX,DDX60,DHX58,HELZ2,IFI16,IFI44,IFIH1,IFIT1B,IFIT2,IFIT3,IFITM3,IFNG,IRF7,ISG15,ISG20,JUNB,LAG3,Ms4a4b (includes others),Mx1/Mx2,NOS2,OAS1,OAS2,OAS3,OASL,Oasl2,PARP12,PARP14,PHF11,RSAD2,SAMD9L,STAT2,TNFAIP3,TNFSF10,Trim30a/Trim30d,USP18,ZBP1
Interferon alpha	group	Activated	6.143	2.66e-35	ADAR,APOBEC3B,AXL,CCL5,CD8A,CH25H,CXCL10,CXCL3,DAXX,DHX58,FASN,Gzmb,HELZ2,HERC6,HLA-A,IFI16,IFI35,IFI44,IFIH1,IFIT1B,IFIT2,IFIT3,IFITM3,IFNG,IGFBP4,IL12RB1,IL1RN,IL7,IRF7,ISG15,ISG20,LIF,LILRB4,MDM2,Mx1/Mx2,NFKBIA,NOS2,OAS1,OAS2,OAS3,PARP10,PARP12,PARP14,PHF11,PRF1,RNF213,RSAD2,SAMD9L,SLFN12L,Slfn2,SP110,STAT2,TAP2,TAPBP,TMEM140,TNFSF10,TRIM5,UBA7,USP18,ZBP1
IFNG	cytokine	Activated	7.799	4.54e-33	ACLY,ACOD1,AGRN,APOL6,C10orf10,C1R,C4A/C4B,CASP4,CCL11,Ccl2,CCL3L3,CCL5,CCRL2,CD274,CDH13,CFB,CH25H,CLEC4E,CMPK2,CP,CSF1,CXCL10,Cxcl11,CXCL3,DAXX,DTX3L,DUSP1,EDNRB,FASN,GBP6,Gbp8,GCH1,GSDMD,Gvin1 (includes others),HCAR2,HERC6,HLA-A,HLA-E,HMGCS1,IDI1,IFI16,IFI35,IFI44,IFIH1,IFIT1B,IFIT2,IFIT3,IFITM3,IFNG,IGFBP4,IL12RB1,IL18BP,IL1A,IL1RL1,IL1RN,IL3RA,IL7,IRAK2,IRF7,ISG15,ISG20,JUNB,KLF6,LAG3,LGALS3…
STAT1	transcription regulator	Activated	6.628	6.58e-33	ACOD1,APOBEC3B,APOL6,AXL,C1R,C1S,C4A/C4B,CASP4,Ccl2,CCL3L3,CCL5,CCRL2,CD274,CFB,CH25H,CMPK2,CXCL10,Cxcl11,CXCL3,DDX60,GBP6,Gzmb,HERC6,HLA-E,IFI16,IFI35,IFIH1,IFIT1B,IFIT2,IFIT3,IFITM3,IFNG,IL18BP,IRF7,ISG15,MDM2,Mx1/Mx2,NOS2,OAS1,OAS2,OASL,PRF1,RNF213,RSAD2,SAMD9L,SLFN12L,Slfn2,SP110,STAT2,TAPBPL,TNFSF10,TRAFD1,USP18,XAF1
Ifnar	group	Activated	5.625	1.25e-32	APOBEC3B,AXL,Ccl2,CCL5,CD274,CD8A,CXCL10,HLA-A,HLA-E,IFI16,IFI35,IFIH1,IFIT1B,IFIT2,IFIT3,IFITM3,IFNG,IRF7,ISG15,ISG20,Mx1/Mx2,OAS1,OAS2,OASL,RNF213,RSAD2,STAT2,TAP2,TAPBP,TNFSF10,USP18,XAF1,ZBP1
IFNB1	cytokine	Activated	5.062	1.58e-32	ACOD1,APOL6,Apol7e (includes others),AXL,Ccl2,CCL5,CD274,CH25H,CLEC4E,CMPK2,CXCL10,CXCL3,DAXX,DHX58,GBP6,Gbp8,Gvin1 (includes others),HLA-A,HMGCS1,IDI1,IFI16,IFIH1,IFIT1B,IFIT2,IFIT3,IFNG,IRF7,ISG15,ISG20,MCM6,Mx1/Mx2,NOCT,NOS2,OAS1,Oas1b,Oas1d (includes others),OAS2,Oasl2,PARP12,RSAD2,STAT2,TNFSF10,Trim30a/Trim30d,TRIM6-TRIM34,UBA7,USP18,XAF1,ZBP1,ZDHHC14
TICAM1	other	Activated	5.786	3.06e-31	ACOD1,APOBEC3B,Apol11a (includes others),Apol7e (includes others),CASP4,Ccl2,CCL3L3,CCL5,CCRL2,CFB,CH25H,CMPK2,CXCL10,Cxcl11,CXCL3,DUSP1,EDNRB,FPR1,IFI16,IFIT1B,IFIT2,IFIT3,IFNG,IL18BP,IL1A,IRF7,ISG15,ISG20,Ms4a4b (includes others),Mx1/Mx2,NFKBIA,NFKBIZ,OASL,RSAD2,SLC7A2,TNFAIP3,TNFSF10
ACKR2	g-protein coupled receptor	Inhibited	-4.379	1.47e-29	ACOD1,ADAR,CCL5,CXCL10,DDX60,DHX58,IFI16,IFI44,IFIT1B,IFIT2,IFIT3,IL1A,IRF7,ISG15,ISG20,OAS1,OAS2,OAS3,OASL,Oasl2,RSAD2,STAT2,USP18
IFNA2	cytokine	Activated	6.276	1.55e-29	APOL6,C1R,C1S,CCL5,CMPK2,CXCL10,DDX60,Gzmb,HERC6,HIST1H2AL,HLA-A,HLA-E,HMGCS1,IFI16,IFI35,IFI44,IFIH1,IFIT2,IFIT3,IFITM3,IFNG,IRF7,ISG15,ISG20,LGALS3BP,LILRB4,MDM2,Mx1/Mx2,OAS1,OAS2,OAS3,PARP12,PHF11,RSAD2,SAMSN1,SLC15A3,SP110,TNFSF10,UBA7,USP18,XAF1,ZBP1
lipopolysaccharide	chemical drug	Activated	8.775	7.37e-27	ABCC4,ACLY,ACOD1,ADAR,APOBEC3B,Apol11a (includes others),APOL6,Apol7e (includes others),ATP2B1,CASP4,CCL11,Ccl2,CCL3L3,CCL5,CCNL1,CCRL2,CD274,CD8A,CFB,CH25H,CLEC4D,CLEC4E,CMPK2,CP,CSF1,CSTB,CXCL10,Cxcl11,CXCL3,DAXX,DHX58,DUSP1,Erdr1,ETV5,F2RL2,FASN,FPR1,GADD45A,GADD45B,GBP6,GCH1,H2-M2,H2-Q5,H2-T10,HCAR2,HLA-A,HYOU1,IDH1,IFI16,IFI35,IFI44,IFIH1,IFIT1B,IFIT2,IFIT3,IFNG,IGFBP4,IL12RB1,IL1A,IL1RN,IL3…
IFNLR1	transmembrane receptor			1.65e-25	CCL3L3,CCL5,CLEC4D,CLEC4E,CMPK2,CSF1,CXCL10,Cxcl11,CXCL3,IFI44,IFIH1,IFIT1B,IFIT2,IFIT3,IL1A,IRF7,ISG15,LIF,OASL,RSAD2,TNFAIP2,TNFAIP3
TLR3	transmembrane receptor	Activated	5.612	3.43e-25	ACOD1,Ccl2,CCL3L3,CCL5,CD274,CFB,CMPK2,CXCL10,Cxcl11,CXCL3,DHX58,DUSP1,GADD45B,GCH1,Gzmb,IFI16,IFI44,IFIH1,IFIT2,IFIT3,IFNG,IL1A,IL1RN,IRF7,ISG15,ISG20,JUNB,LILRB4,Mx1/Mx2,NFKBIZ,NOS2,OAS1,OASL,Oasl2,RSAD2,SLPI,STYK1,TNFSF10,USP18
IFNL1	cytokine	Activated	4.776	2.46e-24	APOL6,CXCL10,DDX60,HERC6,IFI35,IFI44,IFIH1,IFIT2,IFIT3,IFITM3,IFNG,ISG15,ISG20,LGALS3BP,OAS1,OAS2,OAS3,OASL,PHF11,RSAD2,SP110,TMEM140,USP18
DNASE2	enzyme	Inhibited	-3.411	2.32e-23	CH25H,CP,CXCL10,DHX58,IFIT1B,IFIT3,IFNG,IRF7,ISG15,Ly6a (includes others),Ms4a4b (includes others),Mx1/Mx2,OAS1,OAS3,Oasl2,RSAD2,TNFSF10,USP18,ZBP1
TRIM24	transcription regulator	Inhibited	-5.265	3.81e-23	AGRN,CMPK2,CXCL10,DDX60,DHX58,HERC6,IFI35,IFI44,IFIH1,IFIT1B,IFIT2,IFIT3,IRF7,ISG15,LGALS3BP,Ly6a (includes others),Ms4a4b (includes others),OAS1,OASL,PARP12,PCLAF,PHF11,SAMD9L,STAT2,TRAFD1,TRIM6-TRIM34,UBA7,USP18
MAVS	other	Activated	4.285	6.39e-22	ADAR,CCL5,CMPK2,CXCL10,DHX58,IFIT1B,IFIT2,IFIT3,IFITM3,IFNG,IRF7,ISG15,ISG20,OAS1,OAS2,OASL,Oasl2,PARP12,RSAD2,STAT2
salmonella minnesota R595 lipopolysaccharides	chemical - endogenous non-mammalian	Activated	5.14	1.36e-21	ACOD1,AXL,CASP4,Ccl2,CCL3L3,CCL5,CCRL2,CH25H,CMPK2,CXCL10,CXCL3,EDNRB,FPR1,IFIT1B,IFIT2,IFNG,IL1A,ISG15,JUNB,Ms4a4b (includes others),NFKBIA,NFKBIZ,OASL,RSAD2,SLC7A2,SLFN12L,Slfn2,TNFAIP3
TLR9	transmembrane receptor	Activated	5.42	1.39e-21	ACOD1,Ccl2,CCL3L3,CCL5,CD274,CSF1,CXCL10,CXCL3,DUSP1,GADD45B,GCH1,IFI16,IFI35,IFIT1B,IFIT2,IFIT3,IFNG,IL1A,IRF7,ISG15,ISG20,LILRB4,Mx1/Mx2,NFKBIZ,NOS2,OAS2,OAS3,Oasl2,RSAD2,SGMS2,STAT2,STYK1,TNFSF10,USP18
IFN Beta	group	Activated	4.811	1.68e-21	CD274,CXCL10,DUSP1,HLA-A,IFI16,IFI35,IFI44,IFIH1,IFIT1B,IFIT2,IFIT3,IFNG,IL1RN,IRF7,ISG15,Mx1/Mx2,NOS2,OAS1,OAS2,OASL,RSAD2,STAT2,TAPBP,TNFSF10,USP18,XAF1,ZBP1
PTGER4	g-protein coupled receptor	Inhibited	-4.746	3e-21	Ccl2,CCL3L3,CH25H,CMPK2,CP,CXCL10,DAXX,GBP6,H2-M2,HCAR2,HERC6,IFI16,IFI35,IFIH1,IFIT1B,IFIT2,IRF7,ISG20,Mx1/Mx2,NOS2,Oas1b,PARP14,RNF213,RSAD2,TNFSF10,TOR3A,USP18,XAF1,YPEL3,ZDHHC14
MYD88	other	Activated	5.337	5.17e-21	ACOD1,APOBEC3B,CASP4,Ccl2,CCL3L3,CCL5,CCRL2,CD274,CH25H,CMPK2,CXCL10,CXCL3,DAXX,DUSP1,EDNRB,FPR1,Gzmb,HLA-A,IFIT1B,IFIT2,IFNG,IL1A,IL1RN,IRF7,ISG15,MRC1,Ms4a4b (includes others),NFKBIA,NFKBIZ,NOS2,OASL,PARP1,RSAD2,SLC7A2,TNFAIP3,USP18
STAT3	transcription regulator		-0.906	4.26e-20	CCL11,Ccl2,CCL3L3,CCL5,CCRL2,CD274,CFB,CMPK2,CXCL10,CXCL3,FASN,GADD45A,GBP6,Gzmb,HERC6,HLA-A,IFI16,IFI35,IFI44,IFIH1,IFIT1B,IFIT2,IFIT3,IFITM3,IFNG,IL12RB1,IL1RN,IL7,IRF7,ISG15,ISG20,JUNB,LIF,LILRB4,Mx1/Mx2,NFKBIZ,NOS2,OAS1,OAS2,OAS3,OASL,PEG10,PRF1,RSAD2,SLFN12L,Slfn2,SP110,STAT2,TNFSF10,TRIM5,USP18,XAF1
IFN alpha/beta	group	Activated	4.112	4.4e-20	ARHGEF10,AXL,CCL5,CCRL2,CXCL10,DAXX,H2-Q5,HLA-A,IFI16,IFIT2,IFIT3,IFNG,IL7,IRF7,Ly6a (includes others),MRC1,Mx1/Mx2,NOS2,RSAD2,SLPI,STAT2,TNFSF10,Treml4
IRF5	transcription regulator	Activated	4.481	6.78e-20	CCL5,CMPK2,CXCL10,DHX58,IFI44,IFIH1,IFIT2,IFIT3,IFITM3,IRF7,ISG15,ISG20,OAS1,OAS2,OASL,Oasl2,PARP12,RSAD2,SP110,STAT2,TNFSF10
IL1RN	cytokine	Inhibited	-4.593	1.05e-19	CXCL10,CXCL3,GSDMD,HERC6,IFI44,IFIH1,IFIT3,IFNG,IGFBP4,IL18BP,IL1A,IRF7,ISG20,KLF6,LIF,NOS2,OAS1,OAS2,OAS3,OASL,RSAD2,SLC15A3,STAT2,TNFSF10,USP18
TMEM173	other	Activated	3.815	1.54e-19	C15orf48,CCL5,CXCL10,IFI16,IFI44,IFIT1B,IFIT3,IRF7,ISG15,LIF,Mx1/Mx2,NOS2,OAS1,OASL,RGS16,RSAD2,UPP1,USP18
CGAS	enzyme	Activated	3.109	3.45e-19	CCL5,CXCL10,IFI44,IFIT1B,IFIT2,IFIT3,IRF7,ISG15,Mx1/Mx2,OAS1,RSAD2,USP18
RNASEH2A	enzyme			4.79e-19	ADAR,CXCL10,IFI16,IFI35,IFI44,IFIH1,IFIT1B,IFIT2,IFIT3,IFITM3,IRF7,ISG15,ISG20,NFKBIA,OAS1,OASL,RSAD2,USP18
MAPK1	kinase	Inhibited	-4.69	4.94e-19	ADAM12,ADAR,APOL6,C1S,CCL3L3,CCL5,CFB,CSTA,DUSP1,HLA-E,IFI16,IFI35,IFI44,IFIH1,IFIT2,IFIT3,IFITM3,IFNG,IL12RB1,IL1RN,IRF7,ISG15,ISG20,JUNB,LAG3,LGALS3BP,LIF,NOS2,NUPR1,OAS1,OAS2,OAS3,OASL,PARP12,PHF11,RGS16,SP110,STAT2,TNFSF10,TRIM5,USP18
CHUK	kinase	Activated	4.593	7.91e-19	ACOD1,CASP4,CCL11,Ccl2,CCL3L3,CCL5,CDH13,CH25H,CP,CSF1,CXCL10,Cxcl11,CXCL3,GADD45B,GCH1,HLA-A,IFI16,IFI35,IFIT1B,IFIT2,IFNG,IL1A,IL1RN,ISG15,JUNB,NFKBIA,NOCT,RGS16,Slfn2,TK1,TNFAIP2,TNFAIP3,TNFRSF11B
E. coli B4 lipopolysaccharide	chemical toxicant	Activated	5.655	1.21e-18	ACOD1,CCL11,Ccl2,CCL3L3,CCL5,CD274,Csprs (includes others),CXCL10,CXCL3,ELF1,FPR1,H2-K2/H2-Q9,HLA-A,IFI16,IFI35,IFIT1B,IFIT3,IFITM3,IFNG,IL1A,IL1RN,LILRB4,Ly6a (includes others),MRC1,Mx1/Mx2,NFKBIA,NOS2,Oasl2,Plscr2,RSAD2,SAMSN1,Slfn2,TNFAIP3,TNFSF10,Trim30a/Trim30d,USP18,ZBP1
IRF1	transcription regulator	Activated	4.242	1.67e-18	C1R,CCL5,CD274,CFB,CXCL10,CXCL3,IFI35,IFIH1,IFIT2,IFIT3,IFITM3,IFNG,IL12RB1,IL18BP,IL7,IRF7,ISG15,NOS2,OAS1,OAS2,OASL,RSAD2,SLPI,STAT2,TAP2,TAPBP,TNFSF10,XAF1
stallimycin	biologic drug	Activated	3.397	5.43e-18	CSF1,CXCL10,IFI16,IFI44,IFIH1,IFIT2,IFIT3,IFNG,IL1A,IL3RA,IL7,IRF7,ISG15,NOS2,OAS1,SP110,TNFSF10
DDX58	enzyme	Activated	4.122	5.99e-18	Ccl2,CCL5,CXCL10,IFI35,IFI44,IFIH1,IFIT1B,IFIT2,IFIT3,IRF7,ISG15,ISG20,Mx1/Mx2,OAS1,Oas1d (includes others),RSAD2,STAT2,TNFSF10
IFNA4	cytokine	Activated	3.908	3.56e-17	CCRL2,CD274,CXCL10,H2-T22,HLA-E,IFIH1,IFIT2,IFNG,ISG15,LILRB4,Ly6a (includes others),Mx1/Mx2,OASL,RSAD2,USP18,ZBP1
IL1B	cytokine	Activated	6.118	5.12e-17	ACOD1,AKR1B1,APOL6,C1R,CASP4,CCL11,Ccl2,CCL5,CCRL2,CD274,CFB,CMPK2,CP,CSF1,CSRNP1,CXCL10,Cxcl11,CXCL3,DUSP1,GADD45A,GADD45B,GBP6,GCH1,Gzmb,HELZ2,HLA-A,HLA-E,IFI16,IFIT1B,IFIT3,IFNG,IGFBP4,IL1A,IL1RL1,IL1RN,IL3RA,IL7,IRAK2,IRF7,ISG15,ISG20,JUNB,LIF,MAP2K6,NFKBIA,NFKBIZ,NOCT,NOS2,OAS2,RGS16,RSAD2,SLC7A11,Slfn2,TAP2,TK1,TNFAIP2,TNFAIP3,TNFRSF11B,TNFSF10,TRAFD1,USP18
TLR4	transmembrane receptor	Activated	4.745	7.18e-17	APOBEC3B,Ccl2,CCL3L3,CCL5,CD274,CFB,CMPK2,CXCL10,Cxcl11,CXCL3,DAXX,HELZ2,IFI16,IFIT1B,IFIT2,IFIT3,IFITM3,IFNG,IL18BP,IL1A,IRF7,ISG15,ISG20,LILRB4,Mx1/Mx2,NFKBIA,NFKBIZ,NOS2,OASL,RGS16,RSAD2,SGMS2,SLC7A11,SLFN12L,STAT2,TNFAIP3,TNFSF10,Trim12a
IKBKE	kinase		1.662	1.18e-16	ACOD1,ADAR,Ccl2,CCL3L3,CCL5,CXCL10,Cxcl11,HLA-A,IFI16,IFIH1,IFIT2,IFIT3,IL1A,IL7,IRF7,NFKBIA,NOS2,RSAD2
bromodeoxyuridine	chemical drug	Activated	4.096	1.6e-16	CSF1,CXCL10,IFI16,IFI44,IFIH1,IFIT2,IFIT3,IFNG,IGFBP4,IL1A,IL3RA,IL7,IRF7,ISG15,OAS1,SP110,TNFSF10
IFN type 1	group	Activated	3.778	2.81e-16	Ccl2,CCL5,CXCL10,Cxcl11,DHX58,IFI16,IFIH1,IFIT1B,IFIT2,IFNG,ISG15,Mx1/Mx2,OASL,STAT2,TNFSF10,UBA7
STAT2	transcription regulator	Activated	2.62	4.51e-16	Ccl2,CCL5,CXCL10,IFI35,IFIT1B,IFIT2,IFIT3,IFNG,IRF7,ISG15,Mx1/Mx2,OAS1,OAS2,RSAD2,TNFSF10,USP18
Irgm1	other	Inhibited	-3.988	7.13e-16	CCL5,CXCL10,Cxcl11,IFI16,IFIT1B,IFIT2,IFIT3,IFNG,IRF7,LILRB4,NUPR1,OAS2,OASL,RSAD2,TK1,USP18
SOCS1	other	Inhibited	-4.589	1.01e-15	ACOD1,Ccl2,CXCL10,DUSP1,GBP6,Gvin1 (includes others),Gzmb,IFI16,IFI44,IFIH1,IFIT1B,IFIT2,IFIT3,IFNG,IL12RB1,IRF7,ISG15,ISG20,Mx1/Mx2,NOS2,OAS1,OAS2,Oasl2
CNOT7	transcription regulator			1.23e-15	CMPK2,CSTA,HERC6,IFI35,ISG15,LGALS3BP,OAS1,OAS2,OAS3,PARP12,SLC7A11,SP110,TAP2
SIRT1	transcription regulator	Inhibited	-5.321	2.31e-15	ADAR,Ccl2,CCL5,CMPK2,Csprs (includes others),DDX60,DHX58,FASN,GADD45A,GBP6,H2AFZ,HELZ2,HIST2H2BF,HLA-A,IFI44,IFIT1B,IFIT3,IFITM3,IFNG,IRF7,LGALS3BP,OAS1,OAS2,Oasl2,PANK3,PARP1,PARP12,PARP14,RGS16,RNF213,RSAD2,SLC7A11,Slfn2,SP110,Trim30a/Trim30d,UBA7,USP18
IKBKB	kinase	Activated	4.524	2.68e-15	ACOD1,CCL11,Ccl2,CCL3L3,CCL5,CDC6,CDH13,CH25H,CP,CSF1,CXCL10,Cxcl11,CXCL3,DGKA,EZH2,FASN,GADD45A,GCH1,HLA-A,IFI16,IFIT1B,IFNG,IL1A,IL1RN,ISG15,JUNB,NFKBIA,NOCT,NOS2,RGS16,Slfn2,TNFAIP2,TNFRSF11B
SAMSN1	other	Activated	4.025	1.11e-14	CCL3L3,CMPK2,CXCL10,Cxcl11,DAXX,HELZ2,IFIT1B,IFIT2,IFIT3,IFNG,IRF7,ISG15,ISG20,Mx1/Mx2,NFKBIZ,OASL,RSAD2,SLFN12L,STAT2,Trim12a
IKBKG	kinase	Activated	4.407	2.27e-14	ACOD1,Ccl2,CCL5,CDH13,CH25H,CP,CSF1,CXCL3,GCH1,HLA-A,IFI16,IFIT1B,IL1A,IL1RN,IRF7,ISG15,JUNB,NOCT,RGS16,Slfn2,TNFAIP2,TNFAIP3,TNFSF10
TLR7	transmembrane receptor	Activated	4.497	3.11e-14	Ccl2,CCL5,CD274,CREB5,CXCL10,CXCL3,IFI35,IFIT1B,IFIT3,IFNG,IRF7,ISG15,ISG20,JUNB,Mx1/Mx2,NFKBIA,OAS2,OAS3,RSAD2,STAT2,TNFAIP3
SASH1	other	Activated	4.243	3.84e-14	CMPK2,CXCL10,Cxcl11,DAXX,HELZ2,IFIT1B,IFIT2,IFIT3,IRF7,ISG15,ISG20,Mx1/Mx2,NFKBIZ,OASL,RSAD2,SLFN12L,STAT2,Trim12a
oblimersen	biologic drug	Activated	3.873	4.04e-14	DUSP1,GADD45A,GADD45B,HIST1H2AE,IFI16,IFI35,IFI44,IFIT3,IRF7,ISG15,OAS1,OAS2,OASL,RNF114,RSAD2
imiquimod	chemical drug	Activated	3.953	4.78e-14	Ccl2,CD274,CSTA,IFI35,IFNG,IL1A,IL1RN,IRF7,ISG15,ISG20,JUNB,OAS1,OASL,RNF213,RSAD2,TARM1,TNFSF10
IL21	cytokine	Activated	3.945	5.07e-14	CCL11,CCL3L3,CCL5,CCRL2,CMPK2,CXCL10,GBP6,Gzmb,HERC6,IFI16,IFIT1B,IFIT2,IFIT3,IFNG,IRF7,ISG15,Mx1/Mx2,NOS2,OAS2,OASL,PRF1,RSAD2,STAT2,USP18
TBK1	kinase	Activated	2.845	8.54e-14	ACOD1,CCL3L3,CCL5,CMPK2,CXCL10,Cxcl11,CXCL3,IFIT1B,IFIT2,IFNG,IL1A,IRF7,ISG15,ISG20,Mx1/Mx2,NFKBIZ,RSAD2
TNF	cytokine	Activated	6.844	9.85e-14	ACOD1,AKR1B1,APOBEC3B,ARHGAP18,ATP2B1,C10orf10,CASP4,CCL11,Ccl2,CCL3L3,CCL5,CD274,CD47,CDH13,CFB,CH25H,CLEC4E,CP,CSF1,CXCL10,Cxcl11,CXCL3,DAXX,DUSP1,DUSP10,EDNRB,ETV5,FASN,FDPS,FPR1,GADD45A,GADD45B,GBP6,GCH1,HAPLN1,HLA-A,HLA-E,IFI16,IFIH1,IFIT1B,IFIT3,IFNG,IGFBP4,IL18BP,IL1A,IL1RL1,IL1RN,IL3RA,IL7,IRAK2,IRF7,ISG15,JUNB,KLF6,LIF,MAP2K6,MCAM,Mx1/Mx2,NFKBIA,NFKBIZ,NOCT,NOS2,OAS1,OAS2,OAS3,OASL,PARP1…
STAT6	transcription regulator		-0.792	1.65e-13	CCL11,Ccl2,CCL3L3,CCL5,CXCL10,CXCL3,DGKA,Erdr1,FASN,GADD45B,Gzmb,H2-T22,IFI16,IFIT3,IFNG,IL1A,IL1RN,IRF7,ISG15,ISG20,LDLRAD3,LGALS3BP,LIF,LILRB4,Ly6a (includes others),Ms4a4b (includes others),Mx1/Mx2,NFKBIA,SAMSN1,STAT2,Trim30a/Trim30d
FADD	other		1.581	3.61e-13	Ccl2,CXCL10,Cxcl11,DHX58,GADD45B,IFIH1,IFIT1B,IFIT2,IFNG,IRF7,JUNB,KLF6,Mx1/Mx2,PARP11,RNF114,STAT2,TNFAIP3,TRAFD1
NFATC2	transcription regulator	Activated	4.622	3.77e-13	CCL3L3,CD3G,CMPK2,CXCL10,Cxcl11,CXCL3,DAXX,DGKA,HELZ2,IFIT1B,IFIT2,IFIT3,IFNG,IRF7,ISG15,ISG20,MDM2,Mx1/Mx2,NFKBIZ,OASL,RSAD2,SLFN12L,STAT2
Map3k7	kinase	Activated	2.987	7.59e-13	Ccl2,CCL3L3,CCL5,CMPK2,CXCL10,Cxcl11,CXCL3,FASN,IFIT2,IFNG,ISG15,ISG20,Mx1/Mx2,NFKBIZ,RSAD2,SCD
TNK1	kinase	Activated	3.162	8.5e-13	IFI16,IFIH1,IFIT1B,IFIT2,IRF7,ISG20,NOS2,Oas1b,OAS2,TNFSF10
ADRB	group	Inhibited	-2.445	1.73e-12	ACAT2,AXL,CASP4,Ccl2,CLEC4D,CXCL10,FDPS,GADD45A,GSTA5,HMGCS1,IDH1,IFIT3,JUNB,MSMO1,MVD,NFKBIA,NOS2,OASL,RSAD2,SLC7A11,SRM,YPEL3
DOCK8	other	Activated	4	2.18e-12	CMPK2,CXCL10,Cxcl11,DAXX,HELZ2,IFIT1B,IFIT2,IFIT3,IRF7,ISG15,ISG20,Mx1/Mx2,NFKBIZ,RSAD2,SLFN12L,STAT2
MAP3K7	kinase		0.846	2.18e-12	Ccl2,CCL5,CFB,CH25H,CXCL10,GCH1,IFI44,IFIH1,IFIT2,IFIT3,IRF7,OAS2,OASL,SLPI,TNFSF10,XAF1
Ifn	group	Activated	4.155	2.53e-12	CH25H,CXCL10,DHX58,HLA-A,IFI16,IFIH1,IFITM3,IL7,IRF7,ISG15,ISG20,Mx1/Mx2,NOS2,OAS2,OAS3,OASL,RSAD2,ZBP1
NFKBIA	transcription regulator	Activated	4.345	2.54e-12	ACOD1,AXL,CASP4,CCL11,Ccl2,CCL3L3,CCL5,CDC6,CDH13,CH25H,CP,CSF1,CXCL10,CXCL3,GADD45A,GADD45B,GCH1,HLA-A,IFI16,IFIT1B,IFNG,IL1A,IL1RN,ISG15,JUNB,LIF,MDM2,NFKBIA,NOCT,NOS2,RGS16,SLC12A2,Slfn2,TNFAIP2,TNFAIP3,TNFRSF11B,TNFSF10
TGM2	enzyme	Activated	3.297	3.68e-12	CAD,CCRL2,CSRNP1,CXCL10,DAAM2,DDX60,IFI35,IFIT2,IFIT3,IFNG,OAS1,OAS2,OAS3,OASL,PARP14,RNF213,SAMD9L,SLC7A2,SLPI,SP110,TNFAIP2,TNFRSF11B,TPCN1,UBA7,XAF1
NCOA2	transcription regulator		1.664	4.56e-12	Ccl2,CCL3L3,CCL5,CXCL10,Cxcl11,FASN,HCAR2,IFIT1B,IFIT2,IFNG,IL1A,ISG15,Mx1/Mx2,NFKBIA,OASL,PLIN2
NOS2	enzyme	Activated	2.197	5.53e-12	Ccl2,CCL3L3,CLEC4D,CP,CXCL3,Erdr1,FASN,H2-T10,IFIT1B,IFIT3,IFNG,IL1RN,ISG15,KLF6,LGALS3BP,LILRB4,NFKBIA,NOS2,PRF1,SLFN12L,Slfn2,TNFSF10,TOR3A
IFNA1/IFNA13	cytokine	Activated	3.509	6.02e-12	CXCL10,DHX58,IFIH1,IFIT2,IFNG,IRF7,ISG15,Mx1/Mx2,OAS1,OAS2,RSAD2,STAT2,ZBP1
PRL	cytokine	Activated	4.406	8.03e-12	ADAR,CMPK2,CXCL10,DHX58,DTX3L,HELZ2,HERC6,IFI35,IFI44,IFIH1,IFIT3,IRF7,ISG15,NOS2,NUPR1,OAS1,OAS2,OAS3,PARP10,PARP12,PARP14,RSAD2,SAMD9L,SP110,STAT2,TMEM140,USP18,XAF1
IRF9	transcription regulator		1.822	1.09e-11	CXCL10,IFIT2,IFIT3,IFITM3,IFNG,IL1A,IRF7,ISG15,OAS2,STAT2,TNFSF10
TREX1	enzyme		-1.98	1.45e-11	CXCL10,IFI16,IFI44,IFIT1B,IFIT2,ISG15,OASL,USP18
APP	other	Activated	5.234	1.47e-11	ATP5C1,AXL,C1R,C1S,C4A/C4B,Ccl2,CCL3L3,CCL5,CH25H,CMPK2,COX7A2,CP,CSF1,CXCL10,CXCL3,DAXX,GBP6,H2-M2,HCAR2,HERC6,HIST1H2AD,HLA-E,IFI16,IFI35,IFIH1,IFIT1B,IFIT2,IFNG,IL1A,IRF7,ISG20,JUNB,KCNE3,Ly6a (includes others),MRC1,Mx1/Mx2,NOS2,Oas1b,PARP14,PRKAR2A,RNF213,RSAD2,SCN1A,SLC7A11,TNFAIP2,TNFSF10,TOR3A,USP18,WASF1,XAF1,YPEL3,ZDHHC14,ZNRF1
INSIG1	other	Inhibited	-4.145	1.69e-11	ACLY,CCL5,CLEC4D,CLEC4E,CXCL10,CXCL3,ELOVL6,FASN,FDFT1,FDPS,HMGCS1,IDI1,IFNG,MRC1,NFKBIZ,PLIN2,PRF1,SCD
PAF1	other	Activated	3.464	4.2e-11	CCL3L3,CCL5,HELZ2,IFI44,IFIT3,IFITM3,ISG15,ISG20,NFKBIZ,OAS2,OAS3,OASL
IFNAR2	transmembrane receptor	Activated	2	4.27e-11	CXCL10,IFI44,IFIH1,ISG15,Mx1/Mx2,OAS1,OAS2,TNFSF10,UBA7,USP18,XAF1
6-aminopyrazolopyrimidine derivative compound II	chemical - kinase inhibitor	Inhibited	-2.828	4.27e-11	CCL3L3,IFIT1B,IFITM3,IFNG,IL1A,IRF7,ISG15,Oasl2
FZD9	g-protein coupled receptor	Activated	2.971	4.49e-11	Ccl2,CCL5,CXCL10,IFI16,IFI44,IFIT1B,IRF7,ISG15,Oasl2
ribavirin	chemical drug	Activated	3.232	6.48e-11	APOBEC3B,CCL3L3,Cxcl11,IFIT2,IFIT3,IFNG,IRF7,ISG15,OASL,RSAD2,USP18
IL4	cytokine		1.438	7.29e-11	ACOD1,CAD,CCL11,Ccl2,CCL3L3,CCL5,CD274,CD8A,CSF1,CXCL10,CXCL3,DGKA,F2RL2,FASN,Gzmb,IFI16,IFIT1B,IFIT3,IFNG,IGFBP4,IL12RB1,IL1A,IL1RL1,IL1RN,IL3RA,IRF7,ISG15,ISG20,JUNB,KLF6,LDLRAD3,LGALS3BP,LIF,LILRB4,MRC1,Ms4a4b (includes others),Mx1/Mx2,NFKBIA,NOCT,NOS2,PLIN2,PRF1,SAMSN1,SLC7A2,SRM,STAT2,TAP2,TAPBP,TNFRSF11B,Trim30a/Trim30d
resiquimod	chemical drug	Activated	3.06	1.16e-10	ATP5C1,CASP4,CCL11,Ccl2,CCL3L3,CCL5,CLEC4E,CREB5,CXCL10,Cxcl11,CXCL3,FH,IFNG,IL1A,IRAK2,IRF7,LIF,NFKBIA,NFKBIZ,NOS2,TNFSF10
IL10RA	transmembrane receptor	Inhibited	-4.299	1.78e-10	ACOD1,CCL5,CFB,CLEC4E,EDNRB,GBP6,Gbp8,H2-T22,HCAR2,HLA-A,IFI16,IFNG,IL12RB1,IL18BP,IL1A,IL1RN,IRF7,KCNE3,Ly6a (includes others),NOS2,RNF213,RSAD2,SLC7A11,TAP2,TARM1,Treml4,UPP1,WWP1,ZBP1
USP18	peptidase	Inhibited	-2.772	2.91e-10	Ccl2,CCL3L3,CXCL10,IFITM3,IFNG,IRF7,ISG15,OAS1,TNFSF10
IRAK4	kinase		0.555	2.91e-10	Ccl2,CSRNP1,CXCL10,CXCL3,IFIT1B,IFNG,IRF7,LIF,NFKBIA,NFKBIZ,NOCT,NOS2,RGS16,TNFAIP3
RNASEH2B	enzyme			4.54e-10	CCL5,CXCL10,IFI44,IFIT1B,IFIT3,ISG15,OAS1
