# Supplementary material for: Immunotherapeutic effects of intratumoral nanoplexed poly I:C
Source: J Immunother Cancer. 2019 May 2;7:116. doi: 10.1186/s40425-019-0568-2 (PMC6498680; doi:10.1186/s40425-019-0568-2)
Supplement: Supplementary file 18 — Table S5. Differentially expressed genes induced by BO-112 in B16-OVA in vitro. B16-OVA cell line was incubated either with BO-112 or vehicle for 24 h and its RNA was genome wide analyzed with gene-expression microarrays. Genes were selected as significant using a B > 0 cut-off. (XLSX 241 kb) [file 40425_2019_568_MOESM18_ESM.xlsx]

## Sheet: BvsC
Additional file 18 Table S5. Differentially expressed genes induced by BO-112 in B16-OVA in vitro.
probeset_id	GeneID	GeneName	GeneDescription	TranscriptID	DBName	TranscriptDescription	logFC	AveExpr	t	P.Value	adj.P.Val	B
TC1100002649.mm.2	NM_001145164	Tgtp2	T cell specific GTPase 2	NM_001145164	RefSeq	Mus musculus T cell specific GTPase 2 (Tgtp2), mRNA.	8.55878	7.82039	35.2467	1.57297e-09	7.336e-07	12.801
TC1100002643.mm.2	NM_001045540	Gm12185	predicted gene 12185	NM_001045540	RefSeq	Mus musculus predicted gene 12185 (Gm12185), mRNA.	8.09532	7.87476	42.3409	4.06178e-10	3.7809e-07	13.9909
TC0700003943.mm.2	NM_009099	Trim30a	tripartite motif-containing 30A	NM_009099	RefSeq	Mus musculus tripartite motif-containing 30A (Trim30a), mRNA.	7.98383	7.61945	69.7165	1.01463e-11	9.6593e-08	16.6434
TC0100003889.mm.2	NM_001033450	Mnda	myeloid cell nuclear differentiation antigen	NM_001033450	RefSeq	Mus musculus myeloid cell nuclear differentiation antigen (Mnda), transcript variant 1, mRNA.	7.92001	7.51821	33.1074	2.49606e-09	1.02389e-06	12.3742
TC0300003133.mm.2	NM_133871	Ifi44	interferon-induced protein 44	NM_133871	RefSeq	Mus musculus interferon-induced protein 44 (Ifi44), mRNA.	7.84273	8.0459	64.8305	1.73776e-11	1.05143e-07	16.3177
TC1100004265.mm.2	NM_018738	Igtp	interferon gamma induced GTPase	NM_018738	RefSeq	Mus musculus interferon gamma induced GTPase (Igtp), mRNA.	7.45484	7.62108	68.1751	1.19734e-11	9.6593e-08	16.5456
TC0100003593.mm.2	NM_001204910	AI607873	expressed sequence AI607873	NM_001204910	RefSeq	Mus musculus expressed sequence AI607873 (AI607873), mRNA.	7.30527	7.56284	42.7753	3.7667e-10	3.64647e-07	14.0542
TC0700004530.mm.2	NM_001252600	Irf7	interferon regulatory factor 7	NM_001252600	RefSeq	Mus musculus interferon regulatory factor 7 (Irf7), transcript variant 2, mRNA.	7.26057	8.07332	70.3678	9.47103e-12	9.6593e-08	16.6835
TC1600001479.mm.2	NM_007470	Apod	apolipoprotein D	NM_007470	RefSeq	Mus musculus apolipoprotein D (Apod), transcript variant 1, mRNA.	7.20279	8.11716	33.1215	2.48824e-09	1.02389e-06	12.3771
TC0100003891.mm.2	BC008167	Ifi203	interferon activated gene 203	BC008167	GenBank	Mus musculus interferon activated gene 203, mRNA (cDNA clone MGC:5842 IMAGE:3257492), complete cds.	7.05421	7.30503	38.8841	7.61939e-10	4.98391e-07	13.4502
TC0500002757.mm.2	NM_019494	Cxcl11	chemokine (C-X-C motif) ligand 11	NM_019494	RefSeq	Mus musculus chemokine (C-X-C motif) ligand 11 (Cxcl11), transcript variant 1, coding, mRNA.	7.0363	7.88289	37.0078	1.09769e-09	5.77527e-07	13.1265
TC0700003946.mm.2	NM_001167828	Trim30d	tripartite motif-containing 30D	NM_001167828	RefSeq	Mus musculus tripartite motif-containing 30D (Trim30d), transcript variant 2, mRNA.	6.94102	6.59459	51.9072	9.00767e-11	2.10898e-07	15.1881
TC0500002895.mm.2	NM_001039646	Gbp10	guanylate-binding protein 10	NM_001039646	RefSeq	Mus musculus guanylate-binding protein 10 (Gbp10), mRNA.	6.91048	8.53478	47.9966	1.60775e-10	2.52189e-07	14.7448
TC1800000610.mm.2	NM_001146275	Iigp1	interferon inducible GTPase 1	NM_001146275	RefSeq	Mus musculus interferon inducible GTPase 1 (Iigp1), transcript variant 2, mRNA.	6.86679	7.28113	50.1219	1.16695e-10	2.35354e-07	14.9928
TC0300001447.mm.2	NM_010260	Gbp2	guanylate binding protein 2	NM_010260	RefSeq	Mus musculus guanylate binding protein 2 (Gbp2), mRNA.	6.83007	8.55819	51.4728	9.5855e-11	2.10898e-07	15.1416
TC1100003382.mm.2	NM_001167743	Slfn8	schlafen 8	NM_001167743	RefSeq	Mus musculus schlafen 8 (Slfn8), transcript variant 2, mRNA.	6.67681	7.2892	54.1597	6.57832e-11	2.10898e-07	15.4189
TC1400002869.mm.2	NM_199015	Phf11d	PHD finger protein 11D	NM_199015	RefSeq	Mus musculus PHD finger protein 11D (Phf11d), mRNA.	6.63128	8.01211	29.6129	5.67687e-09	1.65168e-06	11.5919
TC0100003591.mm.2	NM_001177349	Pydc4	pyrin domain containing 4	NM_001177349	RefSeq	Mus musculus pyrin domain containing 4 (Pydc4), transcript variant 1, mRNA.	6.52677	6.74676	39.4823	6.80704e-10	4.71837e-07	13.5487
TC0500003731.mm.2	NM_001256005	Gbp4	guanylate binding protein 4	NM_001256005	RefSeq	Mus musculus guanylate binding protein 4 (Gbp4), transcript variant 1, mRNA.	6.51966	8.14148	37.2062	1.05521e-09	5.67515e-07	13.1618
TC0300001446.mm.2	NM_001289492	Gbp3	guanylate binding protein 3	NM_001289492	RefSeq	Mus musculus guanylate binding protein 3 (Gbp3), transcript variant 1, mRNA.	6.48476	8.19326	38.1353	8.79565e-10	5.19304e-07	13.3237
TC0500001239.mm.2	NM_011854	Oasl2	2-5 oligoadenylate synthetase-like 2	NM_011854	RefSeq	Mus musculus 2-5 oligoadenylate synthetase-like 2 (Oasl2), mRNA.	6.37954	8.92229	55.8956	5.20869e-11	2.10898e-07	15.5859
TC1100004266.mm.2	NM_019440	Irgm2	immunity-related GTPase family M member 2	NM_019440	RefSeq	Mus musculus immunity-related GTPase family M member 2 (Irgm2), mRNA.	6.32843	8.48547	35.4611	1.50414e-09	7.28065e-07	12.8418
TC0100000743.mm.2	NM_001081746	Gm7609	predicted pseudogene 7609	NM_001081746	RefSeq	Mus musculus predicted pseudogene 7609 (Gm7609), mRNA.	6.28423	8.65309	46.5097	2.02898e-10	2.72744e-07	14.5606
TC0100000766.mm.2	NM_013673	Sp100	nuclear antigen Sp100	NM_013673	RefSeq	Mus musculus nuclear antigen Sp100 (Sp100), transcript variant 1, mRNA.	6.18553	8.79459	44.6714	2.73368e-10	3.30803e-07	14.3195
TC1200000225.mm.2	NM_020557	Cmpk2	cytidine monophosphate (UMP-CMP) kinase 2, mitochondrial	NM_020557	RefSeq	Mus musculus cytidine monophosphate (UMP-CMP) kinase 2, mitochondrial (Cmpk2), mRNA.	6.14456	8.58441	35.0459	1.64068e-09	7.35328e-07	12.7624
TC1200001552.mm.2	NM_021384	Rsad2	radical S-adenosyl methionine domain containing 2	NM_021384	RefSeq	Mus musculus radical S-adenosyl methionine domain containing 2 (Rsad2), mRNA.	6.08234	9.16001	53.5966	7.10724e-11	2.10898e-07	15.3628
TC0600001369.mm.2	NM_011909	Usp18	ubiquitin specific peptidase 18	NM_011909	RefSeq	Mus musculus ubiquitin specific peptidase 18 (Usp18), mRNA.	6.05099	8.56396	48.691	1.44571e-10	2.51756e-07	14.8278
TC1600002148.mm.2	NM_010846	Mx1	MX dynamin-like GTPase 1	NM_010846	RefSeq	Mus musculus MX dynamin-like GTPase 1 (Mx1), transcript variant 1, mRNA.	5.9069	7.8522	39.7762	6.44433e-10	4.71837e-07	13.5963
TC0100003888.mm.2	NM_008329	Ifi204	interferon activated gene 204	NM_008329	RefSeq	Mus musculus interferon activated gene 204 (Ifi204), mRNA.	5.88054	8.42285	35.2369	1.5762e-09	7.336e-07	12.7991
TC1100000681.mm.2	NM_001135115	Gm12250	predicted gene 12250	NM_001135115	RefSeq	Mus musculus predicted gene 12250 (Gm12250), mRNA.	5.86155	7.84282	27.7685	9.11102e-09	2.3211e-06	11.1297
TC0700001116.mm.2	NM_001113527	Isg20	interferon-stimulated protein	NM_001113527	RefSeq	Mus musculus interferon-stimulated protein (Isg20), transcript variant 2, mRNA.	5.63048	8.6702	46.1722	2.1412e-10	2.72744e-07	14.5174
TC1600001092.mm.2	NM_013606	Mx2	MX dynamin-like GTPase 2	NM_013606	RefSeq	Mus musculus MX dynamin-like GTPase 2 (Mx2), transcript variant 1, mRNA.	5.62955	8.60103	53.4582	7.24455e-11	2.10898e-07	15.3488
TC0500003730.mm.2	NM_172777	Gbp9	guanylate-binding protein 9	NM_172777	RefSeq	Mus musculus guanylate-binding protein 9 (Gbp9), mRNA.	5.58687	7.3881	21.8157	5.3479e-08	1.00333e-05	9.33778
TC1800000606.mm.2	NM_001033767	Gm4951	predicted gene 4951	NM_001033767	RefSeq	Mus musculus predicted gene 4951 (Gm4951), mRNA.	5.55352	6.77679	31.5742	3.54007e-09	1.27876e-06	12.0449
TC1100002648.mm.2	NM_173434	9930111J21Rik2	RIKEN cDNA 9930111J21 gene 2	NM_173434	RefSeq	Mus musculus RIKEN cDNA 9930111J21 gene 2 (9930111J21Rik2), mRNA.	5.51694	7.13745	48.6429	1.45632e-10	2.51756e-07	14.8221
TC1600000346.mm.2	NM_023386	Rtp4	receptor transporter protein 4	NM_023386	RefSeq	Mus musculus receptor transporter protein 4 (Rtp4), mRNA.	5.48723	6.92896	52.7258	8.02297e-11	2.10898e-07	15.2739
TC0500002756.mm.2	NM_021274	Cxcl10	chemokine (C-X-C motif) ligand 10	NM_021274	RefSeq	Mus musculus chemokine (C-X-C motif) ligand 10 (Cxcl10), mRNA.	5.48507	10.3968	36.1169	1.31394e-09	6.62501e-07	12.9646
TC1500001809.mm.2	NM_001162883	Apol9a	apolipoprotein L 9a	NM_001162883	RefSeq	Mus musculus apolipoprotein L 9a (Apol9a), transcript variant 2, mRNA.	5.47624	8.71949	28.2491	8.03093e-09	2.11266e-06	11.2538
TC0500002755.mm.2	NM_008599	Cxcl9	chemokine (C-X-C motif) ligand 9	NM_008599	RefSeq	Mus musculus chemokine (C-X-C motif) ligand 9 (Cxcl9), mRNA.	5.43613	7.50696	21.9357	5.13745e-08	9.94693e-06	9.37936
TC0500001240.mm.2	NM_145209	Oasl1	2-5 oligoadenylate synthetase-like 1	NM_145209	RefSeq	Mus musculus 2-5 oligoadenylate synthetase-like 1 (Oasl1), mRNA.	5.40959	7.28107	32.6092	2.79121e-09	1.10742e-06	12.2694
TC1900000502.mm.2	NM_001005858	Ifit3b	interferon-induced protein with tetratricopeptide repeats 3B	NM_001005858	RefSeq	Mus musculus interferon-induced protein with tetratricopeptide repeats 3B (Ifit3b), mRNA.	5.40025	10.4605	27.969	8.6417e-09	2.22496e-06	11.1818
TC1400002162.mm.2	NM_001164327	Phf11b	PHD finger protein 11B	NM_001164327	RefSeq	Mus musculus PHD finger protein 11B (Phf11b), mRNA.	5.39051	8.14324	41.0522	5.10374e-10	4.25933e-07	13.7972
TC0500003175.mm.2	NM_145227	Oas2	2-5 oligoadenylate synthetase 2	NM_145227	RefSeq	Mus musculus 2-5 oligoadenylate synthetase 2 (Oas2), mRNA.	5.38417	7.68837	28.5339	7.45973e-09	2.02197e-06	11.3261
TC1900000504.mm.2	NM_008331	Ifit1	interferon-induced protein with tetratricopeptide repeats 1	NM_008331	RefSeq	Mus musculus interferon-induced protein with tetratricopeptide repeats 1 (Ifit1), mRNA.	5.34599	9.47538	43.2979	3.44339e-10	3.62334e-07	14.1291
TC0100002711.mm.2	uc007bth.2	Csprs	component of Sp100-rs	uc007bth.2	UCSC Genes	Mus musculus component of Sp100-rs (Csprs), mRNA.	5.31822	8.72994	38.01	9.01197e-10	5.19304e-07	13.3022
TC0100001634.mm.2	NM_001162938	Pydc3	pyrin domain containing 3	NM_001162938	RefSeq	Mus musculus pyrin domain containing 3 (Pydc3), mRNA.	5.2865	6.4304	18.7451	1.61792e-07	2.27657e-05	8.17753
TC1100003396.mm.2	NM_013653	Ccl5	chemokine (C-C motif) ligand 5	NM_013653	RefSeq	Mus musculus chemokine (C-C motif) ligand 5 (Ccl5), mRNA.	5.28445	10.6912	47.7614	1.66723e-10	2.52189e-07	14.7163
TC0500002896.mm.2	NM_001039647	Gbp11	guanylate binding protein 11	NM_001039647	RefSeq	Mus musculus guanylate binding protein 11 (Gbp11), transcript variant 1, mRNA.	5.25249	7.58667	28.6689	7.20511e-09	1.99629e-06	11.36
TC0500003181.mm.2	NM_145211	Oas1a	2-5 oligoadenylate synthetase 1A	NM_145211	RefSeq	Mus musculus 2-5 oligoadenylate synthetase 1A (Oas1a), mRNA.	5.24158	7.47311	20.5676	8.22565e-08	1.37295e-05	8.88954
TC0400004171.mm.2	NM_015783	Isg15	ISG15 ubiquitin-like modifier	NM_015783	RefSeq	Mus musculus ISG15 ubiquitin-like modifier (Isg15), mRNA.	5.22103	7.73796	41.9368	4.36002e-10	3.81605e-07	13.9311
TC1600001556.mm.2	NM_001039530	Parp14	poly (ADP-ribose) polymerase family, member 14	NM_001039530	RefSeq	Mus musculus poly (ADP-ribose) polymerase family, member 14 (Parp14), mRNA.	5.22027	7.31882	43.4746	3.34127e-10	3.62334e-07	14.1541
TC0300001445.mm.2	NM_001083312	Gbp7	guanylate binding protein 7	NM_001083312	RefSeq	Mus musculus guanylate binding protein 7 (Gbp7), transcript variant 2, mRNA.	5.20052	8.14885	30.4163	4.66141e-09	1.49351e-06	11.782
TC0700004002.mm.2	NM_001039160	Gvin1	GTPase, very large interferon inducible 1	NM_001039160	RefSeq	Mus musculus GTPase, very large interferon inducible 1 (Gvin1), transcript variant 2, mRNA.	5.17912	5.8769	26.611	1.24591e-08	3.0458e-06	10.8196
TC1600001557.mm.2	NM_001013371	Dtx3l	deltex 3-like (Drosophila)	NM_001013371	RefSeq	Mus musculus deltex 3-like (Drosophila) (Dtx3l), mRNA.	5.15688	8.27006	37.3698	1.02158e-09	5.6747e-07	13.1907
TC0700001520.mm.2	NM_001243916	Trim34b	tripartite motif-containing 34B	NM_001243916	RefSeq	Mus musculus tripartite motif-containing 34B (Trim34b), mRNA.	5.11314	6.65342	28.6401	7.25864e-09	1.99629e-06	11.3528
TC1100004292.mm.2	NM_001114679	9930111J21Rik1	RIKEN cDNA 9930111J21 gene 1	NM_001114679	RefSeq	Mus musculus RIKEN cDNA 9930111J21 gene 1 (9930111J21Rik1), mRNA.	5.08235	7.82945	30.7832	4.26752e-09	1.43448e-06	11.8667
TC0200003630.mm.2	NM_001164477	Ifih1	interferon induced with helicase C domain 1	NM_001164477	RefSeq	Mus musculus interferon induced with helicase C domain 1 (Ifih1), transcript variant 2, mRNA.	5.04522	9.24686	46.215	2.12658e-10	2.72744e-07	14.5229
TC1900000501.mm.2	NM_010501	Ifit3	interferon-induced protein with tetratricopeptide repeats 3	NM_010501	RefSeq	Mus musculus interferon-induced protein with tetratricopeptide repeats 3 (Ifit3), mRNA.	5.0369	10.7144	40.3738	5.77226e-10	4.50646e-07	13.6915
TC1100001219.mm.2	NM_011333	Ccl2	chemokine (C-C motif) ligand 2	NM_011333	RefSeq	Mus musculus chemokine (C-C motif) ligand 2 (Ccl2), mRNA.	5.01394	8.42909	24.9057	2.02621e-08	4.67031e-06	10.3316
TC0900000032.mm.2	NM_007609	Casp4	caspase 4, apoptosis-related cysteine peptidase	NM_007609	RefSeq	Mus musculus caspase 4, apoptosis-related cysteine peptidase (Casp4), mRNA.	4.92188	7.11229	21.7414	5.48294e-08	1.01296e-05	9.31193
TC1100000989.mm.2	NM_001037713	Xaf1	XIAP associated factor 1	NM_001037713	RefSeq	Mus musculus XIAP associated factor 1 (Xaf1), transcript variant 1, mRNA.	4.91676	8.69002	37.3201	1.03168e-09	5.6747e-07	13.182
TC0500003180.mm.2	NM_011852	Oas1g	2-5 oligoadenylate synthetase 1G	NM_011852	RefSeq	Mus musculus 2-5 oligoadenylate synthetase 1G (Oas1g), transcript variant 1, mRNA.	4.88772	7.57975	17.7933	2.36336e-07	2.96363e-05	7.77502
TC0700003940.mm.2	NM_001146007	Trim12c	tripartite motif-containing 12C	NM_001146007	RefSeq	Mus musculus tripartite motif-containing 12C (Trim12c), transcript variant 1, mRNA.	4.88643	6.04812	38.0215	8.99193e-10	5.19304e-07	13.3042
TC0700003938.mm.2	NM_023835	Trim12a	tripartite motif-containing 12A	NM_023835	RefSeq	Mus musculus tripartite motif-containing 12A (Trim12a), mRNA.	4.83808	9.02337	32.3519	2.95903e-09	1.13435e-06	12.2145
TC1700002822.mm.2	NM_010397	H2-T22	histocompatibility 2, T region locus 22	NM_010397	RefSeq	Mus musculus histocompatibility 2, T region locus 22 (H2-T22), mRNA.	4.82288	8.45047	30.1801	4.93682e-09	1.49351e-06	11.7268
TC0100003890.mm.2	NM_001170853	Mndal	myeloid nuclear differentiation antigen like	NM_001170853	RefSeq	Mus musculus myeloid nuclear differentiation antigen like (Mndal), mRNA.	4.79404	7.24413	42.8137	3.74177e-10	3.64647e-07	14.0597
TC0900003125.mm.2	NM_017466	Ccrl2	chemokine (C-C motif) receptor-like 2	NM_017466	RefSeq	Mus musculus chemokine (C-C motif) receptor-like 2 (Ccrl2), transcript variant 1, mRNA.	4.7719	7.00374	18.1086	2.08012e-07	2.73603e-05	7.91089
TC0800000659.mm.2	ENSMUST00000070631	Ddx60	DEAD (Asp-Glu-Ala-Asp) box polypeptide 60	ENSMUST00000070631	ENSEMBL	DEAD (Asp-Glu-Ala-Asp) box polypeptide 60 [gene_biotype:protein_coding transcript_biotype:protein_coding]	4.77042	7.13335	22.7007	3.99754e-08	8.13013e-06	9.63834
TC0600000340.mm.2	NM_197986	Tmem140	transmembrane protein 140	NM_197986	RefSeq	Mus musculus transmembrane protein 140 (Tmem140), mRNA.	4.76569	7.25366	32.5023	2.85957e-09	1.11625e-06	12.2467
TC0600001787.mm.2	NM_010156	Samd9l	sterile alpha motif domain containing 9-like	NM_010156	RefSeq	Mus musculus sterile alpha motif domain containing 9-like (Samd9l), mRNA.	4.75573	9.02903	21.8723	5.24747e-08	1.00099e-05	9.35742
TC1800000617.mm.2	NM_001042605	Cd74	CD74 antigen (invariant polypeptide of major histocompatibility complex, class II antigen-associated)	NM_001042605	RefSeq	Mus musculus CD74 antigen (invariant polypeptide of major histocompatibility complex, class II antigen-associated) (Cd74), transcript variant 1, mRNA.	4.73588	7.44465	14.725	9.29081e-07	7.66732e-05	6.30318
TC1_GL456212_random00000013.mm.2	uc008idk.1	Sp110	Sp110 nuclear body protein	uc008idk.1	UCSC Genes	RecName: Full=Sp110 nuclear body protein; AltName: Full=Intracellular pathogen resistance protein 1;	4.72745	6.30184	41.8658	4.4149e-10	3.81605e-07	13.9205
TC0700003936.mm.2	ENSMUST00000051795	Trim5	tripartite motif-containing 5	ENSMUST00000051795	ENSEMBL	tripartite motif-containing 5 [gene_biotype:protein_coding transcript_biotype:protein_coding]	4.71294	7.22637	29.5736	5.73264e-09	1.65168e-06	11.5825
TC1400002161.mm.2	NM_172603	Phf11a	PHD finger protein 11A	NM_172603	RefSeq	Mus musculus PHD finger protein 11A (Phf11a), mRNA.	4.61507	6.36718	16.6848	3.76867e-07	4.14588e-05	7.2762
TC1700000621.mm.2	NM_001161730	Tap1	transporter 1, ATP-binding cassette, sub-family B (MDR/TAP)	NM_001161730	RefSeq	Mus musculus transporter 1, ATP-binding cassette, sub-family B (MDR/TAP) (Tap1), transcript variant 2, mRNA.	4.61212	7.91522	44.264	2.92523e-10	3.37125e-07	14.264
TC0200005290.mm.2	NM_001139519	Zbp1	Z-DNA binding protein 1	NM_001139519	RefSeq	Mus musculus Z-DNA binding protein 1 (Zbp1), transcript variant 2, mRNA.	4.52483	8.15018	39.907	6.28992e-10	4.71837e-07	13.6173
TC1500000632.mm.2	NM_001168660	Apol9b	apolipoprotein L 9b	NM_001168660	RefSeq	Mus musculus apolipoprotein L 9b (Apol9b), transcript variant 1, mRNA.	4.48187	7.58171	24.3452	2.3944e-08	5.46691e-06	10.1624
TC1800001396.mm.2	NM_001034859	Gm4841	predicted gene 4841	NM_001034859	RefSeq	Mus musculus predicted gene 4841 (Gm4841), mRNA.	4.44973	6.50888	11.3716	5.86834e-06	0.000287648	4.29008
TC0100000765.mm.2	NM_001013817	Sp140	Sp140 nuclear body protein	NM_001013817	RefSeq	Mus musculus Sp140 nuclear body protein (Sp140), mRNA.	4.41111	6.97677	22.1685	4.75554e-08	9.28175e-06	9.45927
TC0100001381.mm.2	NM_011267	Rgs16	regulator of G-protein signaling 16	NM_011267	RefSeq	Mus musculus regulator of G-protein signaling 16 (Rgs16), mRNA.	4.34927	8.27297	31.3983	3.68879e-09	1.31288e-06	12.0058
TC1100003779.mm.2	NM_030150	Dhx58	DEXH (Asp-Glu-X-His) box polypeptide 58	NM_030150	RefSeq	Mus musculus DEXH (Asp-Glu-X-His) box polypeptide 58 (Dhx58), mRNA.	4.33643	7.62216	26.1335	1.42316e-08	3.3768e-06	10.6869
TC1600000500.mm.2	NM_030253	Parp9	poly (ADP-ribose) polymerase family, member 9	NM_030253	RefSeq	Mus musculus poly (ADP-ribose) polymerase family, member 9 (Parp9), mRNA.	4.27839	7.58324	30.3069	4.78671e-09	1.49351e-06	11.7565
TC0700002644.mm.2	NM_001190974	Axl	AXL receptor tyrosine kinase	NM_001190974	RefSeq	Mus musculus AXL receptor tyrosine kinase (Axl), transcript variant 2, mRNA.	4.27485	7.78973	40.8602	5.28359e-10	4.26245e-07	13.7675
TC0100000758.mm.2	uc007bty.1	Csprs	component of Sp100-rs	uc007bty.1	UCSC Genes	Mus musculus component of Sp100-rs (Csprs), mRNA.	4.17751	9.09788	31.28	3.79282e-09	1.33034e-06	11.9793
TC1100001238.mm.2	NM_011408	Slfn2	schlafen 2	NM_011408	RefSeq	Mus musculus schlafen 2 (Slfn2), mRNA.	4.11639	7.22675	20.4251	8.65385e-08	1.41514e-05	8.83644
TC1700002823.mm.2	NM_010395	H2-T10	histocompatibility 2, T region locus 10	NM_010395	RefSeq	Mus musculus histocompatibility 2, T region locus 10 (H2-T10), transcript variant 1, coding, mRNA.	4.08211	9.97021	39.1888	7.19274e-10	4.83552e-07	13.5006
TC0100003589.mm.2	ENSMUST00000037976	Gm4955	predicted gene 4955 [Source:MGI Symbol;Acc:MGI:3646410]	ENSMUST00000037976	ENSEMBL	predicted gene 4955 [gene_biotype:protein_coding transcript_biotype:protein_coding]	4.08161	6.03383	16.9388	3.37779e-07	3.8561e-05	7.39354
TC0700004003.mm.2	uc029wnq.1	Gm18853	GTPase, very large interferon inducible 1 pseudogene	uc029wnq.1	UCSC Genes	Mus musculus predicted gene, 18853 (Gm18853), non-coding RNA.	4.07165	5.67355	28.1477	8.24625e-09	2.14598e-06	11.2278
TC0500001349.mm.2	NM_001083925	Oas1b	2-5 oligoadenylate synthetase 1B	NM_001083925	RefSeq	Mus musculus 2-5 oligoadenylate synthetase 1B (Oas1b), transcript variant 1, coding, mRNA.	4.02363	8.2041	38.4914	8.21239e-10	5.09632e-07	13.3843
TC1100001661.mm.2	NM_144830	Tmem106a	transmembrane protein 106A	NM_144830	RefSeq	Mus musculus transmembrane protein 106A (Tmem106a), mRNA.	4.02223	7.49615	29.7867	5.43751e-09	1.62467e-06	11.6336
TC1900000441.mm.2	NM_021893	Cd274	CD274 antigen	NM_021893	RefSeq	Mus musculus CD274 antigen (Cd274), mRNA.	4.00929	8.32528	30.3925	4.68833e-09	1.49351e-06	11.7765
TC0700003862.mm.2	NM_001082552	Trim21	tripartite motif-containing 21	NM_001082552	RefSeq	Mus musculus tripartite motif-containing 21 (Trim21), transcript variant 2, mRNA.	4.00905	6.90425	17.7127	2.44253e-07	3.0315e-05	7.73991
TC1500001728.mm.2	NM_001271416	Ly6a	lymphocyte antigen 6 complex, locus A	NM_001271416	RefSeq	Mus musculus lymphocyte antigen 6 complex, locus A (Ly6a), transcript variant 1, mRNA.	3.99478	6.80093	24.1274	2.5575e-08	5.78473e-06	10.0954
TC0200001222.mm.2	NM_019949	Ube2l6	ubiquitin-conjugating enzyme E2L 6	NM_019949	RefSeq	Mus musculus ubiquitin-conjugating enzyme E2L 6 (Ube2l6), mRNA.	3.98629	10.1122	35.0897	1.62563e-09	7.35328e-07	12.7709
TC0300000161.mm.2	NM_009425	Tnfsf10	tumor necrosis factor (ligand) superfamily, member 10	NM_009425	RefSeq	Mus musculus tumor necrosis factor (ligand) superfamily, member 10 (Tnfsf10), mRNA.	3.96946	6.08246	29.5931	5.70489e-09	1.65168e-06	11.5872
TC1_GL456211_random00000010.mm.2	uc008idh.1	C130026I21Rik	RIKEN cDNA C130026I21 gene	uc008idh.1	UCSC Genes	Mus musculus RIKEN cDNA C130026I21 gene (C130026I21Rik), transcript variant 2, mRNA.	3.94364	6.53739	21.4135	6.1273e-08	1.10666e-05	9.19659
TC1500001729.mm.2	NM_001252055	Ly6c1	lymphocyte antigen 6 complex, locus C1	NM_001252055	RefSeq	Mus musculus lymphocyte antigen 6 complex, locus C1 (Ly6c1), transcript variant 2, mRNA.	3.89726	6.50479	23.6003	3.00711e-08	6.61618e-06	9.93031
TC0900001722.mm.2	NM_007464	Birc3	baculoviral IAP repeat-containing 3	NM_007464	RefSeq	Mus musculus baculoviral IAP repeat-containing 3 (Birc3), mRNA.	3.87622	7.62579	14.9157	8.46873e-07	7.38138e-05	6.40354
TC0300001444.mm.2	NM_010259	Gbp2b	guanylate binding protein 2b	NM_010259	RefSeq	Mus musculus guanylate binding protein 2b (Gbp2b), mRNA.	3.85599	6.35225	15.5425	6.29372e-07	6.04447e-05	6.72442
TC1100001657.mm.2	NM_027320	Ifi35	interferon-induced protein 35	NM_027320	RefSeq	Mus musculus interferon-induced protein 35 (Ifi35), mRNA.	3.81919	8.49615	30.4325	4.64321e-09	1.49351e-06	11.7858
TC0800001110.mm.2	NM_001033207	Nlrc5	NLR family, CARD domain containing 5	NM_001033207	RefSeq	Mus musculus NLR family, CARD domain containing 5 (Nlrc5), mRNA.	3.79118	6.51901	20.2038	9.37011e-08	1.51184e-05	8.75313
TC1100001386.mm.2	NM_009546	Trim25	tripartite motif-containing 25	NM_009546	RefSeq	Mus musculus tripartite motif-containing 25 (Trim25), mRNA.	3.79053	6.91449	38.5879	8.06199e-10	5.09632e-07	13.4006
TC0200005438.mm.2	NM_183162	Helz2	helicase with zinc finger 2, transcriptional coactivator	NM_183162	RefSeq	Mus musculus helicase with zinc finger 2, transcriptional coactivator (Helz2), mRNA.	3.77689	9.04385	33.7324	2.17458e-09	9.39808e-07	12.5026
TC1500002347.mm.2	NM_001163575	Parp10	poly (ADP-ribose) polymerase family, member 10	NM_001163575	RefSeq	Mus musculus poly (ADP-ribose) polymerase family, member 10 (Parp10), transcript variant 1, mRNA.	3.77102	9.46816	39.4694	6.82352e-10	4.71837e-07	13.5466
TC0400002434.mm.2	NM_172689	Ddx58	DEAD (Asp-Glu-Ala-Asp) box polypeptide 58	NM_172689	RefSeq	Mus musculus DEAD (Asp-Glu-Ala-Asp) box polypeptide 58 (Ddx58), mRNA.	3.75152	8.60476	31.8092	3.35188e-09	1.24803e-06	12.0967
TC1100002641.mm.2	NM_008326	Irgm1	immunity-related GTPase family M member 1	NM_008326	RefSeq	Mus musculus immunity-related GTPase family M member 1 (Irgm1), mRNA.	3.74165	10.3092	33.4177	2.33013e-09	9.89366e-07	12.4384
TC1300001242.mm.2	NM_152804	Plk2	polo-like kinase 2	NM_152804	RefSeq	Mus musculus polo-like kinase 2 (Plk2), mRNA.	3.73654	6.19243	17.3948	2.78582e-07	3.33774e-05	7.5996
TC0100001632.mm.2	NM_175026	Pyhin1	pyrin and HIN domain family, member 1	NM_175026	RefSeq	Mus musculus pyrin and HIN domain family, member 1 (Pyhin1), mRNA.	3.66734	5.82036	21.0326	6.98616e-08	1.20771e-05	9.06006
TC1700001892.mm.2	NM_001001892	H2-K1	histocompatibility 2, K1, K region	NM_001001892	RefSeq	Mus musculus histocompatibility 2, K1, K region (H2-K1), transcript variant 1, mRNA.	3.64819	9.85352	35.5435	1.47863e-09	7.28065e-07	12.8574
TC1300000904.mm.2	NM_030711	Erap1	endoplasmic reticulum aminopeptidase 1	NM_030711	RefSeq	Mus musculus endoplasmic reticulum aminopeptidase 1 (Erap1), mRNA.	3.62848	8.07326	27.2825	1.03741e-08	2.56197e-06	11.0015
TC1100000614.mm.2	NM_001159393	Irf1	interferon regulatory factor 1	NM_001159393	RefSeq	Mus musculus interferon regulatory factor 1 (Irf1), transcript variant 3, mRNA.	3.59383	9.06394	26.0325	1.46424e-08	3.44053e-06	10.6584
TC1700001954.mm.2	NM_001278601	Tnf	tumor necrosis factor	NM_001278601	RefSeq	Mus musculus tumor necrosis factor (Tnf), transcript variant 2, mRNA.	3.57315	5.87484	12.5754	2.8756e-06	0.0001677	5.0724
TC1100002642.mm.2	NM_001024230	Gm5431	predicted gene 5431	NM_001024230	RefSeq	Mus musculus predicted gene 5431 (Gm5431), mRNA.	3.54943	6.88241	19.0539	1.43645e-07	2.0571e-05	8.30338
TC0600002114.mm.2	NM_172893	Parp12	poly (ADP-ribose) polymerase family, member 12	NM_172893	RefSeq	Mus musculus poly (ADP-ribose) polymerase family, member 12 (Parp12), mRNA.	3.53772	10.2027	33.8873	2.10235e-09	9.2511e-07	12.534
TC0500003176.mm.2	NM_145226	Oas3	2-5 oligoadenylate synthetase 3	NM_145226	RefSeq	Mus musculus 2-5 oligoadenylate synthetase 3 (Oas3), mRNA.	3.53101	6.5629	31.0612	3.99403e-09	1.37757e-06	11.93
TC0300000137.mm.2	NM_001276248	Cp	ceruloplasmin	NM_001276248	RefSeq	Mus musculus ceruloplasmin (Cp), transcript variant 3, mRNA.	3.52816	9.52715	32.8939	2.61795e-09	1.056e-06	12.3296
TC1700002790.mm.2	NM_001267808	H2-L	histocompatibility 2, D region locus L	NM_001267808	RefSeq	Mus musculus histocompatibility 2, D region locus L (H2-L), mRNA.	3.46627	9.22366	31.6753	3.45762e-09	1.2679e-06	12.0673
TC1200001974.mm.2	NM_001170401	Tmem229b	transmembrane protein 229B	NM_001170401	RefSeq	Mus musculus transmembrane protein 229B (Tmem229b), transcript variant 2, mRNA.	3.45274	6.67847	26.2656	1.37141e-08	3.28623e-06	10.7239
TC0800002842.mm.2	NM_013640	Psmb10	proteasome (prosome, macropain) subunit, beta type 10	NM_013640	RefSeq	Mus musculus proteasome (prosome, macropain) subunit, beta type 10 (Psmb10), mRNA.	3.42273	8.84834	36.7211	1.16254e-09	5.98633e-07	13.075
TC0100000375.mm.2	NM_001205313	Stat1	signal transducer and activator of transcription 1	NM_001205313	RefSeq	Mus musculus signal transducer and activator of transcription 1 (Stat1), transcript variant 1, mRNA.	3.39494	10.8175	32.292	2.9997e-09	1.13435e-06	12.2016
TC0600001530.mm.2	NM_053109	Clec2d	C-type lectin domain family 2, member d	NM_053109	RefSeq	Mus musculus C-type lectin domain family 2, member d (Clec2d), mRNA.	3.37036	6.43556	13.0551	2.20201e-06	0.000139289	5.36417
TC1700002819.mm.2	NM_010398	H2-T23	histocompatibility 2, T region locus 23	NM_010398	RefSeq	Mus musculus histocompatibility 2, T region locus 23 (H2-T23), mRNA.	3.36079	6.7388	20.9015	7.31279e-08	1.24637e-05	9.01241
TC1000001596.mm.2	NM_019963	Stat2	signal transducer and activator of transcription 2	NM_019963	RefSeq	Mus musculus signal transducer and activator of transcription 2 (Stat2), mRNA.	3.29902	9.41413	28.4507	7.62176e-09	2.02705e-06	11.305
TC1700000684.mm.2	NM_001143689	H2-Q4	histocompatibility 2, Q region locus 4	NM_001143689	RefSeq	Mus musculus histocompatibility 2, Q region locus 4 (H2-Q4), mRNA.	3.23124	6.30602	19.5313	1.19944e-07	1.79871e-05	8.49363
TC1800000609.mm.2	NM_001101475	F830016B08Rik	RIKEN cDNA F830016B08 gene	NM_001101475	RefSeq	Mus musculus RIKEN cDNA F830016B08 gene (F830016B08Rik), mRNA.	3.20021	6.25593	21.7737	5.42383e-08	1.00975e-05	9.32317
TC0700003996.mm.2	NM_001243039	Gm4070	predicted gene 4070	NM_001243039	RefSeq	Mus musculus predicted gene 4070 (Gm4070), transcript variant 1, mRNA.	3.19699	5.19703	27.2943	1.03412e-08	2.56197e-06	11.0046
TC1700001902.mm.2	NM_013585	Psmb9	proteasome (prosome, macropain) subunit, beta type 9 (large multifunctional peptidase 2)	NM_013585	RefSeq	Mus musculus proteasome (prosome, macropain) subunit, beta type 9 (large multifunctional peptidase 2) (Psmb9), mRNA.	3.19474	6.17203	13.5438	1.69323e-06	0.000111966	5.65081
TC1100003395.mm.2	NM_001045543	Heatr9	HEAT repeat containing 9	NM_001045543	RefSeq	Mus musculus HEAT repeat containing 9 (Heatr9), mRNA.	3.18391	5.13488	19.3898	1.26473e-07	1.8664e-05	8.43777
TC1200001768.mm.2	NM_010907	Nfkbia	nuclear factor of kappa light polypeptide gene enhancer in B cells inhibitor, alpha	NM_010907	RefSeq	Mus musculus nuclear factor of kappa light polypeptide gene enhancer in B cells inhibitor, alpha (Nfkbia), mRNA.	3.15135	8.38149	30.3761	4.70704e-09	1.49351e-06	11.7727
TC0800002431.mm.2	NM_198095	Bst2	bone marrow stromal cell antigen 2	NM_198095	RefSeq	Mus musculus bone marrow stromal cell antigen 2 (Bst2), mRNA.	3.13801	10.7161	14.1731	1.22267e-06	8.93993e-05	6.00516
TC1400002160.mm.2	NM_001164329	Gm6904	predicted gene 6904	NM_001164329	RefSeq	Mus musculus predicted gene 6904 (Gm6904), mRNA.	3.1283	6.43477	15.3805	6.78831e-07	6.31887e-05	6.64274
TC0100003102.mm.2	NM_007570	Btg2	B cell translocation gene 2, anti-proliferative	NM_007570	RefSeq	Mus musculus B cell translocation gene 2, anti-proliferative (Btg2), mRNA.	3.10526	7.38115	24.0599	2.61064e-08	5.85024e-06	10.0745
TC0100002721.mm.2	BC071209	Csprs	component of Sp100-rs	BC071209	GenBank	Mus musculus component of Sp100-rs, mRNA (cDNA clone MGC:78111 IMAGE:4910142), complete cds.	3.08383	5.39613	12.6224	2.80032e-06	0.0001641	5.10142
TC1100002003.mm.2	ENSMUST00000093902	Rnf213	ring finger protein 213	ENSMUST00000093902	ENSEMBL	ring finger protein 213 [gene_biotype:protein_coding transcript_biotype:protein_coding]	3.07886	10.053	27.3184	1.02743e-08	2.56197e-06	11.011
TC1100000496.mm.2	NM_001271676	Ifi47	interferon gamma inducible protein 47	NM_001271676	RefSeq	Mus musculus interferon gamma inducible protein 47 (Ifi47), transcript variant 2, mRNA.	3.04173	9.07297	23.3292	3.2728e-08	7.00958e-06	9.8437
TC0700004515.mm.2	NM_025378	Ifitm3	interferon induced transmembrane protein 3	NM_025378	RefSeq	Mus musculus interferon induced transmembrane protein 3 (Ifitm3), mRNA.	3.0411	11.4452	23.0973	3.52131e-08	7.3468e-06	9.76868
TC0300002718.mm.2	NM_001113529	Csf1	colony stimulating factor 1 (macrophage)	NM_001113529	RefSeq	Mus musculus colony stimulating factor 1 (macrophage) (Csf1), transcript variant 2, mRNA.	3.03912	10.2185	30.2514	4.85184e-09	1.49351e-06	11.7435
TC0500000527.mm.2	NM_011435	Sod3	superoxide dismutase 3, extracellular	NM_011435	RefSeq	Mus musculus superoxide dismutase 3, extracellular (Sod3), mRNA.	2.99753	8.4527	26.5065	1.28245e-08	3.1038e-06	10.7908
TC0100002177.mm.2	NM_153408	Neurl3	neuralized E3 ubiquitin protein ligase 3	NM_153408	RefSeq	Mus musculus neuralized E3 ubiquitin protein ligase 3 (Neurl3), mRNA.	2.99142	7.11654	11.4069	5.74122e-06	0.00028357	4.31414
TC0200003528.mm.2	NM_001141948	Nmi	N-myc (and STAT) interactor	NM_001141948	RefSeq	Mus musculus N-myc (and STAT) interactor (Nmi), transcript variant 2, mRNA.	2.97548	8.98578	20.0157	1.00318e-07	1.58686e-05	8.68154
TC1100004159.mm.2	NM_011150	Lgals3bp	lectin, galactoside-binding, soluble, 3 binding protein	NM_011150	RefSeq	Mus musculus lectin, galactoside-binding, soluble, 3 binding protein (Lgals3bp), mRNA.	2.96884	9.49464	31.0116	4.04131e-09	1.37757e-06	11.9188
TC1100004291.mm.2	NM_001281472	Psme2b	protease (prosome, macropain) activator subunit 2B	NM_001281472	RefSeq	Mus musculus protease (prosome, macropain) activator subunit 2B (Psme2b), mRNA.	2.968	8.12633	21.3462	6.26997e-08	1.12404e-05	9.17266
TC0100002707.mm.2	NM_001037909	C130026I21Rik	RIKEN cDNA C130026I21 gene	NM_001037909	RefSeq	Mus musculus RIKEN cDNA C130026I21 gene (C130026I21Rik), transcript variant 2, mRNA.	2.95311	8.86522	22.7703	3.90884e-08	8.0171e-06	9.66142
TC0800002146.mm.2	NM_126166	Tlr3	toll-like receptor 3	NM_126166	RefSeq	Mus musculus toll-like receptor 3 (Tlr3), mRNA.	2.95094	9.28285	28.5032	7.51909e-09	2.02197e-06	11.3183
TC0600003071.mm.2	NM_001134391	Apobec1	apolipoprotein B mRNA editing enzyme, catalytic polypeptide 1	NM_001134391	RefSeq	Mus musculus apolipoprotein B mRNA editing enzyme, catalytic polypeptide 1 (Apobec1), transcript variant 2, mRNA.	2.94124	7.09965	19.9013	1.04603e-07	1.6333e-05	8.6376
TC1_GL456221_random00000019.mm.2	NM_033616	Csprs	component of Sp100-rs	NM_033616	RefSeq	Mus musculus component of Sp100-rs (Csprs), mRNA.	2.92209	5.4456	13.1085	2.1388e-06	0.000136871	5.39597
TC1100003314.mm.2	NM_001159301	Lgals9	lectin, galactose binding, soluble 9	NM_001159301	RefSeq	Mus musculus lectin, galactose binding, soluble 9 (Lgals9), transcript variant 2, mRNA.	2.9063	10.3977	18.3948	1.85595e-07	2.48164e-05	8.03202
TC1400002091.mm.2	NM_001029855	Psme2	proteasome (prosome, macropain) activator subunit 2 (PA28 beta)	NM_001029855	RefSeq	Mus musculus proteasome (prosome, macropain) activator subunit 2 (PA28 beta) (Psme2), transcript variant 2, mRNA.	2.89877	8.96418	28.7407	7.07371e-09	1.99067e-06	11.378
TC0600003503.mm.2	NM_025992	Herc6	hect domain and RLD 6	NM_025992	RefSeq	Mus musculus hect domain and RLD 6 (Herc6), mRNA.	2.8742	10.4292	18.9645	1.48651e-07	2.11626e-05	8.26717
TC1400001182.mm.2	NM_008392	Irg1	immunoresponsive gene 1	NM_008392	RefSeq	Mus musculus immunoresponsive gene 1 (Irg1), mRNA.	2.87077	6.00237	15.4666	6.52025e-07	6.17048e-05	6.68625
TC0200005181.mm.2	NM_001033196	Znfx1	zinc finger, NFX1-type containing 1	NM_001033196	RefSeq	Mus musculus zinc finger, NFX1-type containing 1 (Znfx1), transcript variant 1, mRNA.	2.86766	9.19408	23.2245	3.38241e-08	7.11835e-06	9.80995
TC1500002183.mm.2	NM_172612	Rnd1	Rho family GTPase 1	NM_172612	RefSeq	Mus musculus Rho family GTPase 1 (Rnd1), mRNA.	2.84318	6.2623	19.8654	1.05989e-07	1.64208e-05	8.62378
TC1900000500.mm.2	NM_008332	Ifit2	interferon-induced protein with tetratricopeptide repeats 2	NM_008332	RefSeq	Mus musculus interferon-induced protein with tetratricopeptide repeats 2 (Ifit2), mRNA.	2.78054	10.2132	28.9909	6.63669e-09	1.88966e-06	11.4402
TC1700002004.mm.2	NM_001081032	Gm8909	predicted gene 8909	NM_001081032	RefSeq	Mus musculus predicted gene 8909 (Gm8909), mRNA.	2.78008	5.65837	20.5435	8.29616e-08	1.37523e-05	8.88061
TC1400002834.mm.2	NM_001159417	Irf9	interferon regulatory factor 9	NM_001159417	RefSeq	Mus musculus interferon regulatory factor 9 (Irf9), transcript variant 1, mRNA.	2.77073	7.45248	25.8245	1.55307e-08	3.61417e-06	10.5994
TC0100003320.mm.2	NM_023141	Tor3a	torsin family 3, member A	NM_023141	RefSeq	Mus musculus torsin family 3, member A (Tor3a), mRNA.	2.7564	8.9005	21.8693	5.25271e-08	1.00099e-05	9.35639
TC0600001481.mm.2	NM_181402	Parp11	poly (ADP-ribose) polymerase family, member 11	NM_181402	RefSeq	Mus musculus poly (ADP-ribose) polymerase family, member 11 (Parp11), mRNA.	2.74748	8.77033	30.1911	4.92364e-09	1.49351e-06	11.7294
TC1700000623.mm.2	NM_011530	Tap2	transporter 2, ATP-binding cassette, sub-family B (MDR/TAP)	NM_011530	RefSeq	Mus musculus transporter 2, ATP-binding cassette, sub-family B (MDR/TAP) (Tap2), mRNA.	2.72077	8.11856	15.083	7.81473e-07	7.00201e-05	6.49052
TC1000001813.mm.2	NM_001166402	Tnfaip3	tumor necrosis factor, alpha-induced protein 3	NM_001166402	RefSeq	Mus musculus tumor necrosis factor, alpha-induced protein 3 (Tnfaip3), transcript variant 2, mRNA.	2.72076	6.42814	13.8764	1.42311e-06	9.92896e-05	5.84007
TC1400000946.mm.2	NM_019675	Stmn4	stathmin-like 4	NM_019675	RefSeq	Mus musculus stathmin-like 4 (Stmn4), transcript variant 2, mRNA.	2.7026	4.67613	20.0281	9.98684e-08	1.58686e-05	8.68625
TC1800001180.mm.2	NM_001033141	Ecscr	endothelial cell surface expressed chemotaxis and apoptosis regulator	NM_001033141	RefSeq	Mus musculus endothelial cell surface expressed chemotaxis and apoptosis regulator (Ecscr), mRNA.	2.66238	7.65607	18.7848	1.59315e-07	2.25482e-05	8.19386
TC1700002820.mm.2	NM_001271005	C920025E04Rik	RIKEN cDNA C920025E04 gene	NM_001271005	RefSeq	Mus musculus RIKEN cDNA C920025E04 gene (C920025E04Rik), mRNA.	2.62325	6.52952	17.6697	2.48611e-07	3.06984e-05	7.72106
TC1000003161.mm.2	NM_016811	Dgka	diacylglycerol kinase, alpha	NM_016811	RefSeq	Mus musculus diacylglycerol kinase, alpha (Dgka), mRNA.	2.59637	7.6572	17.3364	2.85459e-07	3.38661e-05	7.57355
TC1700000353.mm.2	NM_029197	Meiob	meiosis specific with OB domains	NM_029197	RefSeq	Mus musculus meiosis specific with OB domains (Meiob), mRNA.	2.5836	4.85713	15.3821	6.78311e-07	6.31887e-05	6.64357
TC1300000258.mm.2	NM_015786	Hist1h1c	histone cluster 1, H1c	NM_015786	RefSeq	Mus musculus histone cluster 1, H1c (Hist1h1c), mRNA.	2.54483	8.45556	18.6236	1.69634e-07	2.33687e-05	8.12739
TC1700002814.mm.2	NM_009780	C4b	complement component 4B (Chido blood group)	NM_009780	RefSeq	Mus musculus complement component 4B (Chido blood group) (C4b), mRNA.	2.53048	7.98976	15.092	7.78116e-07	7.00073e-05	6.49518
TC1300001173.mm.2	NM_001081020	Adamts6	a disintegrin-like and metallopeptidase (reprolysin type) with thrombospondin type 1 motif, 6	NM_001081020	RefSeq	Mus musculus a disintegrin-like and metallopeptidase (reprolysin type) with thrombospondin type 1 motif, 6 (Adamts6), mRNA.	2.50197	5.20355	13.641	1.60876e-06	0.000108757	5.70657
TC1100001197.mm.2	NM_028019	Rnf135	ring finger protein 135	NM_028019	RefSeq	Mus musculus ring finger protein 135 (Rnf135), mRNA.	2.49365	8.13601	22.8438	3.81778e-08	7.89726e-06	9.68566
TC1700000864.mm.2	NM_008690	Nfkbie	nuclear factor of kappa light polypeptide gene enhancer in B cells inhibitor, epsilon	NM_008690	RefSeq	Mus musculus nuclear factor of kappa light polypeptide gene enhancer in B cells inhibitor, epsilon (Nfkbie), transcript variant 1, mRNA.	2.47746	7.77571	19.8517	1.06523e-07	1.64208e-05	8.61849
TC1700002778.mm.2	NM_001025313	Tapbp	TAP binding protein	NM_001025313	RefSeq	Mus musculus TAP binding protein (Tapbp), transcript variant 1, mRNA.	2.46443	10.0289	20.7538	7.70161e-08	1.29441e-05	8.95833
TC0900000412.mm.2	NM_001145957	Vwa5a	von Willebrand factor A domain containing 5A	NM_001145957	RefSeq	Mus musculus von Willebrand factor A domain containing 5A (Vwa5a), transcript variant 2, mRNA.	2.46045	8.17675	15.0111	8.08845e-07	7.1444e-05	6.45327
TC0200003209.mm.2	NM_001177627	Slc2a6	solute carrier family 2 (facilitated glucose transporter), member 6	NM_001177627	RefSeq	Mus musculus solute carrier family 2 (facilitated glucose transporter), member 6 (Slc2a6), transcript variant 2, mRNA.	2.45713	9.04738	23.6559	2.95566e-08	6.56265e-06	9.94794
TC0700002696.mm.2	NM_011756	Zfp36	zinc finger protein 36	NM_011756	RefSeq	Mus musculus zinc finger protein 36 (Zfp36), mRNA.	2.44444	7.01331	16.638	3.84613e-07	4.17417e-05	7.25437
TC0100003662.mm.2	NM_001163290	Adck3	aarF domain containing kinase 3	NM_001163290	RefSeq	Mus musculus aarF domain containing kinase 3 (Adck3), transcript variant 2, mRNA.	2.4175	8.04731	19.5587	1.18725e-07	1.79586e-05	8.50439
TC1900001423.mm.2	NM_053217	Ifit1bl2	interferon induced protein with tetratricopeptide repeats 1B like 2	NM_053217	RefSeq	Mus musculus interferon induced protein with tetratricopeptide repeats 1B like 2 (Ifit1bl2), mRNA.	2.41314	5.3187	11.1696	6.65873e-06	0.000318487	4.15117
TC0700002503.mm.2	NM_033601	Bcl3	B cell leukemia/lymphoma 3	NM_033601	RefSeq	Mus musculus B cell leukemia/lymphoma 3 (Bcl3), mRNA.	2.40936	6.71172	14.4292	1.07509e-06	8.29532e-05	6.14487
TC1700002815.mm.2	NM_011413	C4a	complement component 4A (Rodgers blood group)	NM_011413	RefSeq	Mus musculus complement component 4A (Rodgers blood group) (C4a), mRNA.	2.3997	6.12551	16.0888	4.90369e-07	5.13763e-05	6.99337
TC0900000599.mm.2	NM_008360	Il18	interleukin 18	NM_008360	RefSeq	Mus musculus interleukin 18 (Il18), mRNA.	2.3931	5.15771	17.1917	3.03362e-07	3.58144e-05	7.50854
TC0900000033.mm.2	NM_009808	Casp12	caspase 12	NM_009808	RefSeq	Mus musculus caspase 12 (Casp12), mRNA.	2.36789	5.01174	7.0428	0.000155278	0.00332001	0.673113
TC1900001422.mm.2	NM_001101605	Ifit1bl1	interferon induced protein with tetratricpeptide repeats 1B like 1	NM_001101605	RefSeq	Mus musculus interferon induced protein with tetratricpeptide repeats 1B like 1 (Ifit1bl1), transcript variant 2, mRNA.	2.36202	5.50087	7.59071	9.46603e-05	0.0023473	1.22034
TC0100001382.mm.2	NM_011882	Rnasel	ribonuclease L (2, 5-oligoisoadenylate synthetase-dependent)	NM_011882	RefSeq	Mus musculus ribonuclease L (2, 5-oligoisoadenylate synthetase-dependent) (Rnasel), mRNA.	2.34508	8.31542	22.6669	4.04139e-08	8.15082e-06	9.62711
TC0500003186.mm.2	NM_001163470	Trafd1	TRAF type zinc finger domain containing 1	NM_001163470	RefSeq	Mus musculus TRAF type zinc finger domain containing 1 (Trafd1), transcript variant 1, mRNA.	2.31914	8.22797	16.6262	3.86585e-07	4.17684e-05	7.24889
TC1900000102.mm.2	NM_028967	Batf2	basic leucine zipper transcription factor, ATF-like 2	NM_028967	RefSeq	Mus musculus basic leucine zipper transcription factor, ATF-like 2 (Batf2), mRNA.	2.3048	7.31219	21.4638	6.02306e-08	1.09602e-05	9.21442
TC0400001992.mm.2	NM_001077508	Tnfrsf9	tumor necrosis factor receptor superfamily, member 9	NM_001077508	RefSeq	Mus musculus tumor necrosis factor receptor superfamily, member 9 (Tnfrsf9), transcript variant 2, mRNA.	2.28212	6.68349	15.1651	7.51509e-07	6.88239e-05	6.53281
TC0500003178.mm.2	NM_033541	Oas1c	2-5 oligoadenylate synthetase 1C	NM_033541	RefSeq	Mus musculus 2-5 oligoadenylate synthetase 1C (Oas1c), mRNA.	2.27049	6.55843	14.5379	1.01862e-06	8.10883e-05	6.20341
TC0500002814.mm.2	NM_008926	Prkg2	protein kinase, cGMP-dependent, type II	NM_008926	RefSeq	Mus musculus protein kinase, cGMP-dependent, type II (Prkg2), mRNA.	2.24468	6.50119	10.4423	1.06817e-05	0.000453543	3.63087
TC1100000041.mm.2	NM_001039537	Lif	leukemia inhibitory factor	NM_001039537	RefSeq	Mus musculus leukemia inhibitory factor (Lif), transcript variant 2, mRNA.	2.23699	7.30305	16.8984	3.4367e-07	3.90493e-05	7.37503
TC0600003139.mm.2	NM_145391	Tapbpl	TAP binding protein-like	NM_145391	RefSeq	Mus musculus TAP binding protein-like (Tapbpl), mRNA.	2.23241	7.41859	15.4644	6.52691e-07	6.17048e-05	6.68515
TC0X00003437.mm.2	NM_013563	Il2rg	interleukin 2 receptor, gamma chain	NM_013563	RefSeq	Mus musculus interleukin 2 receptor, gamma chain (Il2rg), transcript variant a, mRNA.	2.22581	6.13439	17.1236	3.12225e-07	3.6149e-05	7.47774
TC0400000908.mm.2	NM_010504	Ifna4	interferon alpha 4	NM_010504	RefSeq	Mus musculus interferon alpha 4 (Ifna4), mRNA.	2.21736	4.62275	8.91067	3.20356e-05	0.0010367	2.41847
TC0900003241.mm.2	NM_010851	Myd88	myeloid differentiation primary response gene 88	NM_010851	RefSeq	Mus musculus myeloid differentiation primary response gene 88 (Myd88), mRNA.	2.20461	8.15952	14.1961	1.20854e-06	8.86337e-05	6.01779
TC0700003942.mm.2	OTTMUST00000045979	Trim30c	tripartite motif-containing 30C	OTTMUST00000045979	Havana transcript	novel tripartite motif protein[gene_biotype:protein_coding transcript_biotype:protein_coding]	2.17978	4.38189	10.5708	9.80544e-06	0.00042836	3.72519
TC0900003250.mm.2	NM_153287	Csrnp1	cysteine-serine-rich nuclear protein 1	NM_153287	RefSeq	Mus musculus cysteine-serine-rich nuclear protein 1 (Csrnp1), mRNA.	2.17621	7.59801	14.6233	9.76576e-07	7.87836e-05	6.24913
TC0900000500.mm.2	NM_023061	Mcam	melanoma cell adhesion molecule	NM_023061	RefSeq	Mus musculus melanoma cell adhesion molecule (Mcam), mRNA.	2.16795	10.5249	21.0637	6.91119e-08	1.20764e-05	9.0713
TC1100000009.mm.2	NM_178149	Pik3ip1	phosphoinositide-3-kinase interacting protein 1	NM_178149	RefSeq	Mus musculus phosphoinositide-3-kinase interacting protein 1 (Pik3ip1), mRNA.	2.14837	8.13046	14.3243	1.13295e-06	8.54197e-05	6.08795
TC0100002210.mm.2	NM_026913	Mitd1	MIT, microtubule interacting and transport, domain containing 1	NM_026913	RefSeq	Mus musculus MIT, microtubule interacting and transport, domain containing 1 (Mitd1), mRNA.	2.14031	9.66203	18.6278	1.69352e-07	2.33687e-05	8.12915
TC0300000949.mm.2	NM_001009935	Txnip	thioredoxin interacting protein	NM_001009935	RefSeq	Mus musculus thioredoxin interacting protein (Txnip), transcript variant 1, mRNA.	2.13312	9.65648	17.151	3.08625e-07	3.60838e-05	7.49014
TC1700000600.mm.2	NM_001199733	Daxx	Fas death domain-associated protein	NM_001199733	RefSeq	Mus musculus Fas death domain-associated protein (Daxx), transcript variant 1, mRNA.	2.11131	9.12113	21.6193	5.71357e-08	1.04757e-05	9.2692
TC1800000263.mm.2	NM_021367	Tslp	thymic stromal lymphopoietin	NM_021367	RefSeq	Mus musculus thymic stromal lymphopoietin (Tslp), transcript variant 1, mRNA.	2.09145	7.36974	15.0556	7.91796e-07	7.04524e-05	6.47633
TC1300002725.mm.2	NM_001081009	Parp8	poly (ADP-ribose) polymerase family, member 8	NM_001081009	RefSeq	Mus musculus poly (ADP-ribose) polymerase family, member 8 (Parp8), mRNA.	2.08786	7.44666	10.7345	8.80378e-06	0.000391117	3.84387
TC0700004660.mm.2	NM_080638	Mvp	major vault protein	NM_080638	RefSeq	Mus musculus major vault protein (Mvp), mRNA.	2.08568	8.0766	20.0465	9.92006e-08	1.58686e-05	8.6933
TC0700001178.mm.2	NM_145375	Tm6sf1	transmembrane 6 superfamily member 1	NM_145375	RefSeq	Mus musculus transmembrane 6 superfamily member 1 (Tm6sf1), transcript variant 1, mRNA.	2.08126	5.21651	8.41768	4.72248e-05	0.00138706	1.98941
TC1000000877.mm.2	NM_008655	Gadd45b	growth arrest and DNA-damage-inducible 45 beta	NM_008655	RefSeq	Mus musculus growth arrest and DNA-damage-inducible 45 beta (Gadd45b), mRNA.	2.07277	7.6913	11.5626	5.21708e-06	0.000263599	4.41932
TC1600000708.mm.2	NM_010581	Cd47	CD47 antigen (Rh-related antigen, integrin-associated signal transducer)	NM_010581	RefSeq	Mus musculus CD47 antigen (Rh-related antigen, integrin-associated signal transducer) (Cd47), mRNA.	2.07101	10.3895	17.973	2.1969e-07	2.82816e-05	7.85279
TC0500000848.mm.2	NM_008176	Cxcl1	chemokine (C-X-C motif) ligand 1	NM_008176	RefSeq	Mus musculus chemokine (C-X-C motif) ligand 1 (Cxcl1), mRNA.	2.06827	6.70774	9.45883	2.12461e-05	0.00074956	2.87221
TC1800000301.mm.2	NM_007913	Egr1	early growth response 1	NM_007913	RefSeq	Mus musculus early growth response 1 (Egr1), mRNA.	2.06713	6.44153	7.88784	7.32334e-05	0.00192861	1.50419
TC0400002251.mm.2	NM_138952	Ripk2	receptor (TNFRSF)-interacting serine-threonine kinase 2	NM_138952	RefSeq	Mus musculus receptor (TNFRSF)-interacting serine-threonine kinase 2 (Ripk2), mRNA.	2.0652	8.45581	18.6161	1.7013e-07	2.33687e-05	8.1243
TC0100002725.mm.2	NM_030194	Sp110	Sp110 nuclear body protein	NM_030194	RefSeq	Mus musculus Sp110 nuclear body protein (Sp110), transcript variant 2, mRNA.	2.06466	7.79695	15.5479	6.27815e-07	6.04447e-05	6.7271
TC0100000736.mm.2	ENSMUST00000097669	Gm10553	predicted gene 10553 [Source:MGI Symbol;Acc:MGI:3642178]	ENSMUST00000097669	ENSEMBL	predicted gene 10553 [gene_biotype:protein_coding transcript_biotype:protein_coding]	2.06298	6.43263	7.2042	0.000133805	0.00300404	0.837639
TC0300002659.mm.2	NM_001163440	Mov10	Moloney leukemia virus 10	NM_001163440	RefSeq	Mus musculus Moloney leukemia virus 10 (Mov10), transcript variant 1, mRNA.	2.02639	8.83702	19.9042	1.04491e-07	1.6333e-05	8.63873
TC1900000689.mm.2	NM_001177369	Nfkb2	nuclear factor of kappa light polypeptide gene enhancer in B cells 2, p49/p100	NM_001177369	RefSeq	Mus musculus nuclear factor of kappa light polypeptide gene enhancer in B cells 2, p49/p100 (Nfkb2), transcript variant 2, mRNA.	2.01451	8.59995	13.8768	1.4228e-06	9.92896e-05	5.84032
TC1900000211.mm.2	NM_023044	Slc15a3	solute carrier family 15, member 3	NM_023044	RefSeq	Mus musculus solute carrier family 15, member 3 (Slc15a3), mRNA.	2.01083	7.4087	13.6321	1.61631e-06	0.000108963	5.70147
TC1000003153.mm.2	NM_010153	Erbb3	v-erb-b2 erythroblastic leukemia viral oncogene homolog 3 (avian)	NM_010153	RefSeq	Mus musculus v-erb-b2 erythroblastic leukemia viral oncogene homolog 3 (avian) (Erbb3), mRNA.	2.00932	8.36528	22.2786	4.58634e-08	9.02427e-06	9.49669
TC0900003011.mm.2	NM_145619	Parp3	poly (ADP-ribose) polymerase family, member 3	NM_145619	RefSeq	Mus musculus poly (ADP-ribose) polymerase family, member 3 (Parp3), transcript variant 2, mRNA.	2.00881	9.55633	19.5211	1.20399e-07	1.79871e-05	8.48964
TC0900001431.mm.2	NM_001284332	Shisa5	shisa family member 5	NM_001284332	RefSeq	Mus musculus shisa family member 5 (Shisa5), transcript variant 3, mRNA.	2.0049	8.23435	20.4637	8.53544e-08	1.40527e-05	8.85086
TC0100002544.mm.2	NM_001276408	Fn1	fibronectin 1	NM_001276408	RefSeq	Mus musculus fibronectin 1 (Fn1), transcript variant 2, mRNA.	2.00133	8.48303	16.7343	3.68862e-07	4.07634e-05	7.29922
TC1700000682.mm.2	NM_010392	H2-Q2	histocompatibility 2, Q region locus 2	NM_010392	RefSeq	Mus musculus histocompatibility 2, Q region locus 2 (H2-Q2), mRNA.	1.99869	6.73553	14.8118	8.9061e-07	7.57785e-05	6.349
TC0300000354.mm.2	NM_009834	Noct	nocturnin	NM_009834	RefSeq	Mus musculus nocturnin (Noct), mRNA.	1.97543	8.63567	19.0759	1.42443e-07	2.05203e-05	8.31226
TC0900001171.mm.2	NM_001195084	Plscr2	phospholipid scramblase 2	NM_001195084	RefSeq	Mus musculus phospholipid scramblase 2 (Plscr2), transcript variant A, mRNA.	1.96711	7.59142	14.7783	9.05223e-07	7.59251e-05	6.33137
TC0200004251.mm.2	NM_178695	Prrg4	proline rich Gla (G-carboxyglutamic acid) 4 (transmembrane)	NM_178695	RefSeq	Mus musculus proline rich Gla (G-carboxyglutamic acid) 4 (transmembrane) (Prrg4), mRNA.	1.94753	8.19955	12.6621	2.73839e-06	0.00016234	5.12589
TC0300000769.mm.2	NM_001038587	Adar	adenosine deaminase, RNA-specific	NM_001038587	RefSeq	Mus musculus adenosine deaminase, RNA-specific (Adar), transcript variant 2, mRNA.	1.94196	9.58138	18.0196	2.156e-07	2.80535e-05	7.87278
TC0100000240.mm.2	NM_001172205	Arid5a	AT rich interactive domain 5A (MRF1-like)	NM_001172205	RefSeq	Mus musculus AT rich interactive domain 5A (MRF1-like) (Arid5a), transcript variant 1, mRNA.	1.93872	7.58865	18.5	1.78057e-07	2.40745e-05	8.07601
TC0800002947.mm.2	NM_029005	Mlkl	mixed lineage kinase domain-like	NM_029005	RefSeq	Mus musculus mixed lineage kinase domain-like (Mlkl), transcript variant 2, mRNA.	1.93305	11.3076	21.1993	6.59449e-08	1.16496e-05	9.12016
TC1400000784.mm.2	NM_011189	Psme1	proteasome (prosome, macropain) activator subunit 1 (PA28 alpha)	NM_011189	RefSeq	Mus musculus proteasome (prosome, macropain) activator subunit 1 (PA28 alpha) (Psme1), mRNA.	1.92283	11.352	19.2689	1.32368e-07	1.92986e-05	8.38972
TC0500003729.mm.2	NM_029509	Gbp8	guanylate-binding protein 8	NM_029509	RefSeq	Mus musculus guanylate-binding protein 8 (Gbp8), mRNA.	1.89577	6.43519	10.3258	1.1553e-05	0.00048171	3.54446
TC0500000850.mm.2	NM_009140	Cxcl2	chemokine (C-X-C motif) ligand 2	NM_009140	RefSeq	Mus musculus chemokine (C-X-C motif) ligand 2 (Cxcl2), mRNA.	1.86017	5.73089	9.89931	1.54994e-05	0.00059354	3.22036
TC1900001388.mm.2	NM_018830	Asah2	N-acylsphingosine amidohydrolase 2	NM_018830	RefSeq	Mus musculus N-acylsphingosine amidohydrolase 2 (Asah2), mRNA.	1.84229	7.47951	13.0275	2.23555e-06	0.000140168	5.34766
TC0300002236.mm.2	NM_011905	Tlr2	toll-like receptor 2	NM_011905	RefSeq	Mus musculus toll-like receptor 2 (Tlr2), mRNA.	1.83592	5.8625	6.94297	0.000170477	0.00352987	0.569906
TC1300000255.mm.2	NM_023422	Hist1h2bc	histone cluster 1, H2bc	NM_023422	RefSeq	Mus musculus histone cluster 1, H2bc (Hist1h2bc), transcript variant 1, mRNA.	1.8349	10.2331	14.7789	9.04964e-07	7.59251e-05	6.33168
TC1000000808.mm.2	NM_013591	Madcam1	mucosal vascular addressin cell adhesion molecule 1	NM_013591	RefSeq	Mus musculus mucosal vascular addressin cell adhesion molecule 1 (Madcam1), mRNA.	1.83434	5.60361	9.81234	1.6479e-05	0.000620257	3.15273
TC0800002597.mm.2	NM_008416	Junb	jun B proto-oncogene	NM_008416	RefSeq	Mus musculus jun B proto-oncogene (Junb), mRNA.	1.8204	7.92358	9.99175	1.45293e-05	0.000571771	3.29167
TC1700002558.mm.2	NM_011163	Eif2ak2	eukaryotic translation initiation factor 2-alpha kinase 2	NM_011163	RefSeq	Mus musculus eukaryotic translation initiation factor 2-alpha kinase 2 (Eif2ak2), mRNA.	1.81943	9.94145	18.1206	2.0701e-07	2.73603e-05	7.91602
TC1100003766.mm.2	NM_010404	Hap1	huntingtin-associated protein 1	NM_010404	RefSeq	Mus musculus huntingtin-associated protein 1 (Hap1), transcript variant 1, mRNA.	1.80727	8.24583	13.7838	1.49309e-06	0.000103541	5.78783
TC0600001422.mm.2	NM_023143	C1ra	complement component 1, r subcomponent A	NM_023143	RefSeq	Mus musculus complement component 1, r subcomponent A (C1ra), mRNA.	1.80683	7.85622	14.5314	1.0219e-06	8.10883e-05	6.19993
TC0200003526.mm.2	NM_001141981	Rbm43	RNA binding motif protein 43	NM_001141981	RefSeq	Mus musculus RNA binding motif protein 43 (Rbm43), transcript variant 2, mRNA.	1.78746	8.31246	17.484	2.68423e-07	3.23202e-05	7.63926
TC1000002240.mm.2	NM_001081127	Adamts14	a disintegrin-like and metallopeptidase (reprolysin type) with thrombospondin type 1 motif, 14	NM_001081127	RefSeq	Mus musculus a disintegrin-like and metallopeptidase (reprolysin type) with thrombospondin type 1 motif, 14 (Adamts14), mRNA.	1.78065	7.95409	14.5609	1.00706e-06	8.0705e-05	6.21579
TC0100001765.mm.2	NM_022019	Dusp10	dual specificity phosphatase 10	NM_022019	RefSeq	Mus musculus dual specificity phosphatase 10 (Dusp10), mRNA.	1.77641	8.15386	16.7628	3.64341e-07	4.06349e-05	7.31244
TC1100001236.mm.2	NM_183201	Slfn5	schlafen 5	NM_183201	RefSeq	Mus musculus schlafen 5 (Slfn5), mRNA.	1.77018	5.02099	7.54247	9.87623e-05	0.00241928	1.17343
TC1800001227.mm.2	NM_029357	Pcdh1	protocadherin 1	NM_029357	RefSeq	Mus musculus protocadherin 1 (Pcdh1), mRNA.	1.75907	6.56917	7.70093	8.59845e-05	0.00219052	1.32665
TC0200003231.mm.2	NM_027040	1700007K13Rik	RIKEN cDNA 1700007K13 gene	NM_027040	RefSeq	Mus musculus RIKEN cDNA 1700007K13 gene (1700007K13Rik), mRNA.	1.74992	6.63738	14.3978	1.09202e-06	8.3636e-05	6.12791
TC0100001617.mm.2	NM_178598	Tagln2	transgelin 2	NM_178598	RefSeq	Mus musculus transgelin 2 (Tagln2), mRNA.	1.74107	9.55524	15.0761	7.84044e-07	7.00201e-05	6.48697
TC0400000084.mm.2	NM_001199105	Trp53inp1	transformation related protein 53 inducible nuclear protein 1	NM_001199105	RefSeq	Mus musculus transformation related protein 53 inducible nuclear protein 1 (Trp53inp1), transcript variant 2, mRNA.	1.73577	8.52452	14.6788	9.50326e-07	7.72862e-05	6.27867
TC1300000364.mm.2	NM_009256	Serpinb9	serine (or cysteine) peptidase inhibitor, clade B, member 9	NM_009256	RefSeq	Mus musculus serine (or cysteine) peptidase inhibitor, clade B, member 9 (Serpinb9), mRNA.	1.73569	6.18394	13.5753	1.66532e-06	0.00011144	5.66892
TC1600001395.mm.2	NM_008555	Masp1	mannan-binding lectin serine peptidase 1	NM_008555	RefSeq	Mus musculus mannan-binding lectin serine peptidase 1 (Masp1), mRNA.	1.71521	7.56107	13.5813	1.66008e-06	0.00011144	5.67236
TC1400002833.mm.2	NM_194346	Rnf31	ring finger protein 31	NM_194346	RefSeq	Mus musculus ring finger protein 31 (Rnf31), mRNA.	1.7119	8.06143	14.6698	9.54527e-07	7.72862e-05	6.27389
TC0200003355.mm.2	NM_009421	Traf1	TNF receptor-associated factor 1	NM_009421	RefSeq	Mus musculus TNF receptor-associated factor 1 (Traf1), mRNA.	1.70732	4.75689	6.90725	0.000176312	0.00361312	0.532715
TC0700002414.mm.2	NM_009156	Sepw1	selenoprotein W, muscle 1	NM_009156	RefSeq	Mus musculus selenoprotein W, muscle 1 (Sepw1), mRNA.	1.6971	9.84188	13.2415	1.98997e-06	0.000128568	5.4747
TC1700002526.mm.2	NM_011723	Xdh	xanthine dehydrogenase	NM_011723	RefSeq	Mus musculus xanthine dehydrogenase (Xdh), mRNA.	1.68582	4.75667	9.52172	2.02951e-05	0.000724109	2.92278
TC1700000496.mm.2	NM_001111099	Cdkn1a	cyclin-dependent kinase inhibitor 1A (P21)	NM_001111099	RefSeq	Mus musculus cyclin-dependent kinase inhibitor 1A (P21) (Cdkn1a), transcript variant 2, mRNA.	1.68414	11.9969	17.1268	3.11801e-07	3.6149e-05	7.47919
TC0700001174.mm.2	NM_001004185	Whamm	WAS protein homolog associated with actin, golgi membranes and microtubules	NM_001004185	RefSeq	Mus musculus WAS protein homolog associated with actin, golgi membranes and microtubules (Whamm), mRNA.	1.68413	9.0498	14.4128	1.08388e-06	8.32765e-05	6.13602
TC1000000021.mm.2	NM_031185	Akap12	A kinase (PRKA) anchor protein (gravin) 12	NM_031185	RefSeq	Mus musculus A kinase (PRKA) anchor protein (gravin) 12 (Akap12), mRNA.	1.68408	5.78938	8.66725	3.87118e-05	0.00119808	2.2092
TC0600003048.mm.2	NM_007544	Bid	BH3 interacting domain death agonist	NM_007544	RefSeq	Mus musculus BH3 interacting domain death agonist (Bid), mRNA.	1.68201	7.5458	11.6624	4.90957e-06	0.00025352	4.48603
TC0700000826.mm.2	NM_009101	Rras	Harvey rat sarcoma oncogene, subgroup R	NM_009101	RefSeq	Mus musculus Harvey rat sarcoma oncogene, subgroup R (Rras), mRNA.	1.66057	10.6898	14.5007	1.03756e-06	8.15296e-05	6.18342
TC1800000200.mm.2	NM_026779	Mocos	molybdenum cofactor sulfurase	NM_026779	RefSeq	Mus musculus molybdenum cofactor sulfurase (Mocos), mRNA.	1.65647	6.63818	15.4711	6.50656e-07	6.17048e-05	6.68852
TC1700002817.mm.2	NM_013484	C2	complement component 2 (within H-2S)	NM_013484	RefSeq	Mus musculus complement component 2 (within H-2S) (C2), mRNA.	1.65308	9.14688	16.2789	4.50419e-07	4.78116e-05	7.08477
TC0400000498.mm.2	NM_146142	Tdrd7	tudor domain containing 7	NM_146142	RefSeq	Mus musculus tudor domain containing 7 (Tdrd7), transcript variant 2, mRNA.	1.64131	8.31374	13.5492	1.68842e-06	0.000111954	5.65391
TC0500000283.mm.2	NM_031168	Il6	interleukin 6	NM_031168	RefSeq	Mus musculus interleukin 6 (Il6), transcript variant 1, mRNA.	1.63689	4.12304	6.71606	0.000211603	0.00411803	0.331127
TC0500000334.mm.2	NM_008037	Fosl2	fos-like antigen 2	NM_008037	RefSeq	Mus musculus fos-like antigen 2 (Fosl2), mRNA.	1.63073	8.06899	13.5683	1.67146e-06	0.00011144	5.66491
TC0100001356.mm.2	NM_022018	Fam129a	family with sequence similarity 129, member A	NM_022018	RefSeq	Mus musculus family with sequence similarity 129, member A (Fam129a), mRNA.	1.62795	7.70506	15.9603	5.19643e-07	5.30649e-05	6.93096
TC0400003079.mm.2	NM_010591	Jun	jun proto-oncogene	NM_010591	RefSeq	Mus musculus jun proto-oncogene (Jun), mRNA.	1.62525	8.99241	10.2269	1.23558e-05	0.000505983	3.47039
TC0200005013.mm.2	NM_001139520	Samhd1	SAM domain and HD domain, 1	NM_001139520	RefSeq	Mus musculus SAM domain and HD domain, 1 (Samhd1), transcript variant 2, mRNA.	1.62438	10.2143	16.3874	4.29281e-07	4.57685e-05	7.13642
TC0200002026.mm.2	NM_001126338	Prnd	prion protein dublet	NM_001126338	RefSeq	Mus musculus prion protein dublet (Prnd), transcript variant 2, mRNA.	1.62249	6.00068	13.897	1.40807e-06	9.92896e-05	5.85163
TC1700001598.mm.2	NM_001161746	Tnfrsf12a	tumor necrosis factor receptor superfamily, member 12a	NM_001161746	RefSeq	Mus musculus tumor necrosis factor receptor superfamily, member 12a (Tnfrsf12a), transcript variant 2, mRNA.	1.61218	10.3453	14.3009	1.14635e-06	8.61613e-05	6.07519
TC0400002601.mm.2	NM_029077	Trim14	tripartite motif-containing 14	NM_029077	RefSeq	Mus musculus tripartite motif-containing 14 (Trim14), mRNA.	1.60565	5.27229	11.8553	4.3713e-06	0.000231497	4.61349
TC1700000745.mm.2	NM_001025599	Trim26	tripartite motif-containing 26	NM_001025599	RefSeq	Mus musculus tripartite motif-containing 26 (Trim26), transcript variant 1, mRNA.	1.60557	8.24896	11.6685	4.89118e-06	0.000253482	4.49015
TC0400000895.mm.2	NM_197889	Ifnz	interferon zeta	NM_197889	RefSeq	Mus musculus interferon zeta (Ifnz), mRNA.	1.60035	6.62962	9.6969	1.78889e-05	0.000658166	3.06212
TC0300000500.mm.2	NM_001289462	Mme	membrane metallo endopeptidase	NM_001289462	RefSeq	Mus musculus membrane metallo endopeptidase (Mme), transcript variant 1, mRNA.	1.59986	6.15807	7.07613	0.000150546	0.00325896	0.707324
TC0300002959.mm.2	NM_028943	Sgms2	sphingomyelin synthase 2	NM_028943	RefSeq	Mus musculus sphingomyelin synthase 2 (Sgms2), mRNA.	1.59605	7.97191	12.9135	2.38032e-06	0.000145109	5.27911
TC1200001397.mm.2	NM_007483	Rhob	ras homolog gene family, member B	NM_007483	RefSeq	Mus musculus ras homolog gene family, member B (Rhob), mRNA.	1.59545	8.81366	14.0586	1.29597e-06	9.30716e-05	5.94187
TC1100002747.mm.2	NR_033332	Gm12216	predicted gene 12216	NR_033332	RefSeq	Mus musculus predicted gene 12216 (Gm12216), long non-coding RNA.	1.58921	6.43285	7.00455	0.000160915	0.0033983	0.633704
TC1700001578.mm.2	NM_001110254	Zfp945	zinc finger protein 945	NM_001110254	RefSeq	Mus musculus zinc finger protein 945 (Zfp945), transcript variant 1, mRNA.	1.58652	7.43818	12.2355	3.49431e-06	0.000195762	4.85901
TC0100003590.mm.2	NM_001024721	BC094916	cDNA sequence BC094916	NM_001024721	RefSeq	Mus musculus cDNA sequence BC094916 (BC094916), mRNA.	1.58159	4.29326	7.47082	0.000105228	0.00253406	1.1033
TC0400000899.mm.2	NM_001085533	Gm13275	predicted gene 13275	NM_001085533	RefSeq	Mus musculus predicted gene 13275 (Gm13275), mRNA.	1.57602	7.1342	6.75091	0.000204621	0.00403303	0.36819
TC0100003313.mm.2	NM_001160018	Tor1aip1	torsin A interacting protein 1	NM_001160018	RefSeq	Mus musculus torsin A interacting protein 1 (Tor1aip1), transcript variant 1, mRNA.	1.56732	8.20261	13.5155	1.71881e-06	0.000113348	5.63447
TC1500001730.mm.2	NM_001099217	Ly6c2	lymphocyte antigen 6 complex, locus C2	NM_001099217	RefSeq	Mus musculus lymphocyte antigen 6 complex, locus C2 (Ly6c2), mRNA.	1.56599	5.36589	9.15528	2.66021e-05	0.000902978	2.62386
TC0200002796.mm.2	NM_031373	Ogfr	opioid growth factor receptor	NM_031373	RefSeq	Mus musculus opioid growth factor receptor (Ogfr), mRNA.	1.55216	10.3776	15.769	5.66934e-07	5.66981e-05	6.83712
TC1000001947.mm.2	NM_001111267	Ncoa7	nuclear receptor coactivator 7	NM_001111267	RefSeq	Mus musculus nuclear receptor coactivator 7 (Ncoa7), transcript variant 2, mRNA.	1.55123	9.12513	14.031	1.31437e-06	9.38362e-05	5.92654
TC1100003063.mm.2	NM_009601	Chrnb1	cholinergic receptor, nicotinic, beta polypeptide 1 (muscle)	NM_009601	RefSeq	Mus musculus cholinergic receptor, nicotinic, beta polypeptide 1 (muscle) (Chrnb1), mRNA.	1.54872	5.19247	11.1696	6.65849e-06	0.000318487	4.15121
TC1500001815.mm.2	NM_177820	Apol10b	apolipoprotein L 10B	NM_177820	RefSeq	Mus musculus apolipoprotein L 10B (Apol10b), mRNA.	1.54616	5.90485	6.51842	0.000256583	0.00477679	0.118272
TC1100004122.mm.2	NM_001167680	Rhbdf2	rhomboid 5 homolog 2 (Drosophila)	NM_001167680	RefSeq	Mus musculus rhomboid 5 homolog 2 (Drosophila) (Rhbdf2), transcript variant 2, mRNA.	1.54437	8.2002	10.1361	1.31488e-05	0.000529666	3.4018
TC1400000163.mm.2	NM_026341	Nudt13	nudix (nucleoside diphosphate linked moiety X)-type motif 13	NM_026341	RefSeq	Mus musculus nudix (nucleoside diphosphate linked moiety X)-type motif 13 (Nudt13), mRNA.	1.54192	8.77547	12.9236	2.36696e-06	0.000144659	5.28526
TC0600001424.mm.2	NM_001113356	C1rb	complement component 1, r subcomponent B	NM_001113356	RefSeq	Mus musculus complement component 1, r subcomponent B (C1rb), mRNA.	1.53488	6.64681	7.20634	0.000133544	0.003001	0.839799
TC1500001653.mm.2	NM_172514	Tmem71	transmembrane protein 71	NM_172514	RefSeq	Mus musculus transmembrane protein 71 (Tmem71), mRNA.	1.52625	7.28053	11.2191	6.45445e-06	0.000309942	4.18543
TC1000001557.mm.2	NM_007837	Ddit3	DNA-damage inducible transcript 3	NM_007837	RefSeq	Mus musculus DNA-damage inducible transcript 3 (Ddit3), transcript variant 1, mRNA.	1.52577	10.5661	16.2642	4.53375e-07	4.79152e-05	7.07774
TC1100002310.mm.2	NM_001252503	Aftph	aftiphilin	NM_001252503	RefSeq	Mus musculus aftiphilin (Aftph), transcript variant 2, mRNA.	1.52542	9.2452	13.2954	1.93298e-06	0.000125421	5.50641
TC0400000901.mm.2	NM_001161610	Gm13287	predicted gene 13287	NM_001161610	RefSeq	Mus musculus predicted gene 13287 (Gm13287), mRNA.	1.52449	7.71975	6.55069	0.000248563	0.00465553	0.153335
TC0200002588.mm.2	NM_030743	Rnf114	ring finger protein 114	NM_030743	RefSeq	Mus musculus ring finger protein 114 (Rnf114), mRNA.	1.52332	9.8618	12.7234	2.64568e-06	0.000158295	5.16356
TC1400001105.mm.2	NM_001286411	Elf1	E74-like factor 1	NM_001286411	RefSeq	Mus musculus E74-like factor 1 (Elf1), transcript variant 2, mRNA.	1.51211	9.34911	13.9522	1.36856e-06	9.71315e-05	5.8826
TC1000001993.mm.2	NM_178908	Fam26e	family with sequence similarity 26, member E	NM_178908	RefSeq	Mus musculus family with sequence similarity 26, member E (Fam26e), mRNA.	1.50866	8.41502	14.4309	1.07417e-06	8.29532e-05	6.14579
TC0600000637.mm.2	NM_172728	Creb5	cAMP responsive element binding protein 5	NM_172728	RefSeq	Mus musculus cAMP responsive element binding protein 5 (Creb5), mRNA.	1.49726	7.157	13.8759	1.42346e-06	9.92896e-05	5.83981
TC1900001461.mm.2	NM_001099634	Myof	myoferlin	NM_001099634	RefSeq	Mus musculus myoferlin (Myof), transcript variant 2, mRNA.	1.49223	9.121	15.8923	5.35929e-07	5.4044e-05	6.89772
TC0400000458.mm.2	NM_027450	Glipr2	GLI pathogenesis-related 2	NM_027450	RefSeq	Mus musculus GLI pathogenesis-related 2 (Glipr2), mRNA.	1.49058	8.56878	15.999	5.1061e-07	5.25863e-05	6.94984
TC0900002389.mm.2	NM_008884	Pml	promyelocytic leukemia	NM_008884	RefSeq	Mus musculus promyelocytic leukemia (Pml), transcript variant 1, mRNA.	1.48707	9.46355	14.4475	1.06534e-06	8.29046e-05	6.15475
TC0400000893.mm.2	NM_001243155	Gm13290	predicted gene 13290	NM_001243155	RefSeq	Mus musculus predicted gene 13290 (Gm13290), mRNA.	1.48142	7.68592	6.73799	0.000207178	0.00404513	0.354471
TC0400000897.mm.2	NM_001098840	Gm13277	predicted gene 13277	NM_001098840	RefSeq	Mus musculus predicted gene 13277 (Gm13277), mRNA.	1.48142	7.68592	6.73799	0.000207178	0.00404513	0.354471
TC0400000898.mm.2	NM_001098841	Gm13278	predicted gene 13278	NM_001098841	RefSeq	Mus musculus predicted gene 13278 (Gm13278), mRNA.	1.48142	7.68592	6.73799	0.000207178	0.00404513	0.354471
TC0400000900.mm.2	ENSMUST00000178602	Gm13279	predicted gene 13279	ENSMUST00000178602	ENSEMBL	predicted gene 13279 [gene_biotype:protein_coding transcript_biotype:protein_coding]	1.48142	7.68592	6.73799	0.000207178	0.00404513	0.354471
TC0400000903.mm.2	NM_001243165	Gm13289	predicted gene 13289	NM_001243165	RefSeq	Mus musculus predicted gene 13289 (Gm13289), mRNA.	1.48142	7.68592	6.73799	0.000207178	0.00404513	0.354471
TC0X00001700.mm.2	NM_001287530	Arhgap6	Rho GTPase activating protein 6	NM_001287530	RefSeq	Mus musculus Rho GTPase activating protein 6 (Arhgap6), transcript variant 3, mRNA.	1.48125	5.5634	8.62708	3.99573e-05	0.00122566	2.17419
TC0700003850.mm.2	NM_010531	Il18bp	interleukin 18 binding protein	NM_010531	RefSeq	Mus musculus interleukin 18 binding protein (Il18bp), mRNA.	1.46356	7.05083	10.9664	7.57688e-06	0.000352646	4.00907
TC0300000881.mm.2	NM_017395	Rfx5	regulatory factor X, 5 (influences HLA class II expression)	NM_017395	RefSeq	Mus musculus regulatory factor X, 5 (influences HLA class II expression) (Rfx5), mRNA.	1.45522	8.33159	13.904	1.40297e-06	9.92828e-05	5.85558
TC0300003087.mm.2	NM_010516	Cyr61	cysteine rich protein 61	NM_010516	RefSeq	Mus musculus cysteine rich protein 61 (Cyr61), mRNA.	1.44933	10.2443	13.7175	1.54557e-06	0.000105666	5.75022
TC0300000809.mm.2	NM_011313	S100a6	S100 calcium binding protein A6 (calcyclin)	NM_011313	RefSeq	Mus musculus S100 calcium binding protein A6 (calcyclin) (S100a6), mRNA.	1.44432	6.37686	8.96891	3.0637e-05	0.00100335	2.4678
TC1000000446.mm.2	NM_198007	Ascc3	activating signal cointegrator 1 complex subunit 3	NM_198007	RefSeq	Mus musculus activating signal cointegrator 1 complex subunit 3 (Ascc3), mRNA.	1.43606	9.44136	13.0532	2.20427e-06	0.000139289	5.36305
TC1700002454.mm.2	NM_172964	Arhgap28	Rho GTPase activating protein 28	NM_172964	RefSeq	Mus musculus Rho GTPase activating protein 28 (Arhgap28), mRNA.	1.43378	6.9044	8.76245	3.59302e-05	0.00112933	2.29164
TC0400000811.mm.2	NM_026821	Lurap1l	leucine rich adaptor protein 1-like	NM_026821	RefSeq	Mus musculus leucine rich adaptor protein 1-like (Lurap1l), mRNA.	1.43137	7.77082	11.7182	4.74649e-06	0.000246512	4.52312
TC1400002180.mm.2	NM_001164155	Tnfrsf19	tumor necrosis factor receptor superfamily, member 19	NM_001164155	RefSeq	Mus musculus tumor necrosis factor receptor superfamily, member 19 (Tnfrsf19), transcript variant 2, mRNA.	1.42797	8.24974	9.98246	1.46237e-05	0.000572691	3.28453
TC1400000574.mm.2	NM_013632	Pnp	purine-nucleoside phosphorylase	NM_013632	RefSeq	Mus musculus purine-nucleoside phosphorylase (Pnp), mRNA.	1.42412	7.90801	10.4281	1.07838e-05	0.000456277	3.62039
TC1700000761.mm.2	NM_023137	Ubd	ubiquitin D	NM_023137	RefSeq	Mus musculus ubiquitin D (Ubd), mRNA.	1.41278	4.10789	7.91875	7.1336e-05	0.00188892	1.53322
TC0600002116.mm.2	NM_001033430	Kdm7a	lysine (K)-specific demethylase 7A	NM_001033430	RefSeq	Mus musculus lysine (K)-specific demethylase 7A (Kdm7a), mRNA.	1.41192	8.45275	12.4437	3.09943e-06	0.000177461	4.99036
TC1700002135.mm.2	NM_199016	Enpp4	ectonucleotide pyrophosphatase/phosphodiesterase 4	NM_199016	RefSeq	Mus musculus ectonucleotide pyrophosphatase/phosphodiesterase 4 (Enpp4), mRNA.	1.40912	8.42791	9.74732	1.7257e-05	0.000643299	3.10182
TC0700002491.mm.2	NM_009046	Relb	avian reticuloendotheliosis viral (v-rel) oncogene related B	NM_009046	RefSeq	Mus musculus avian reticuloendotheliosis viral (v-rel) oncogene related B (Relb), transcript variant 1, mRNA.	1.40633	7.46622	7.77835	8.04228e-05	0.0020817	1.40061
TC1700000464.mm.2	NM_001286743	Pacsin1	protein kinase C and casein kinase substrate in neurons 1	NM_001286743	RefSeq	Mus musculus protein kinase C and casein kinase substrate in neurons 1 (Pacsin1), transcript variant 3, mRNA.	1.4045	6.53665	9.08441	2.80616e-05	0.000939346	2.56484
TC0900000086.mm.2	NR_028271	Phxr4	per-hexamer repeat gene 4	NR_028271	RefSeq	Mus musculus per-hexamer repeat gene 4 (Phxr4), long non-coding RNA.	1.3987	6.99071	8.91291	3.19805e-05	0.0010367	2.42037
TC1500000565.mm.2	NM_026960	Gsdmd	gasdermin D	NM_026960	RefSeq	Mus musculus gasdermin D (Gsdmd), mRNA.	1.38796	6.61411	14.291	1.15207e-06	8.63232e-05	6.06978
TC0200004419.mm.2	NM_001001982	A430105I19Rik	RIKEN cDNA A430105I19 gene	NM_001001982	RefSeq	Mus musculus RIKEN cDNA A430105I19 gene (A430105I19Rik), mRNA.	1.38688	7.25937	9.37969	2.2515e-05	0.000785171	2.80814
TC1300002126.mm.2	NM_153538	Zcchc6	zinc finger, CCHC domain containing 6	NM_153538	RefSeq	Mus musculus zinc finger, CCHC domain containing 6 (Zcchc6), mRNA.	1.38241	8.97373	14.4738	1.05149e-06	8.20909e-05	6.16895
TC1300000709.mm.2	NM_001048060	Idnk	idnK gluconokinase homolog (E. coli)	NM_001048060	RefSeq	Mus musculus idnK gluconokinase homolog (E. coli) (Idnk), transcript variant 2, mRNA.	1.38108	10.5917	11.1088	6.9195e-06	0.000326444	4.10892
TC0900001768.mm.2	NM_028013	Endod1	endonuclease domain containing 1	NM_028013	RefSeq	Mus musculus endonuclease domain containing 1 (Endod1), mRNA.	1.37893	7.55965	10.5247	1.01099e-05	0.0004346	3.6915
TC1300000818.mm.2	NM_001013769	Rsl1	regulator of sex limited protein 1	NM_001013769	RefSeq	Mus musculus regulator of sex limited protein 1 (Rsl1), mRNA.	1.3667	7.41526	13.2395	1.99211e-06	0.000128568	5.47353
TC1200001237.mm.2	NM_009396	Tnfaip2	tumor necrosis factor, alpha-induced protein 2	NM_009396	RefSeq	Mus musculus tumor necrosis factor, alpha-induced protein 2 (Tnfaip2), mRNA.	1.36556	10.0637	12.9866	2.28631e-06	0.000142245	5.32313
TC1000001761.mm.2	NM_001163590	Stx11	syntaxin 11	NM_001163590	RefSeq	Mus musculus syntaxin 11 (Stx11), transcript variant 2, mRNA.	1.36536	6.99911	9.60966	1.90445e-05	0.000695194	2.99301
TC0100002588.mm.2	NM_021313	Rnf25	ring finger protein 25	NM_021313	RefSeq	Mus musculus ring finger protein 25 (Rnf25), transcript variant 1, mRNA.	1.36479	9.09581	14.2114	1.19922e-06	8.8486e-05	6.02621
TC0700000153.mm.2	NM_178732	Zfp324	zinc finger protein 324	NM_178732	RefSeq	Mus musculus zinc finger protein 324 (Zfp324), mRNA.	1.36142	8.54436	12.7791	2.56458e-06	0.000154783	5.1976
TC0200001838.mm.2	NM_009735	B2m	beta-2 microglobulin	NM_009735	RefSeq	Mus musculus beta-2 microglobulin (B2m), mRNA.	1.3606	13.0446	14.427	1.07625e-06	8.29532e-05	6.1437
TC0600002422.mm.2	NM_007836	Gadd45a	growth arrest and DNA-damage-inducible 45 alpha	NM_007836	RefSeq	Mus musculus growth arrest and DNA-damage-inducible 45 alpha (Gadd45a), mRNA.	1.35949	8.67266	11.4194	5.69696e-06	0.00028341	4.32265
TC0700004288.mm.2	NM_019738	Nupr1	nuclear protein transcription regulator 1	NM_019738	RefSeq	Mus musculus nuclear protein transcription regulator 1 (Nupr1), mRNA.	1.35122	9.60077	10.727	8.84758e-06	0.000392178	3.8384
TC0100000919.mm.2	NM_175118	Dusp28	dual specificity phosphatase 28	NM_175118	RefSeq	Mus musculus dual specificity phosphatase 28 (Dusp28), mRNA.	1.34144	6.22837	6.56421	0.000245284	0.00461615	0.167997
TC1100002567.mm.2	NM_001131054	Pttg1	pituitary tumor-transforming gene 1	NM_001131054	RefSeq	Mus musculus pituitary tumor-transforming gene 1 (Pttg1), transcript variant 1, mRNA.	1.32954	9.27793	9.95011	1.49576e-05	0.000581065	3.25962
TC1000002940.mm.2	NM_001288586	Mdm2	transformed mouse 3T3 cell double minute 2	NM_001288586	RefSeq	Mus musculus transformed mouse 3T3 cell double minute 2 (Mdm2), transcript variant 2, mRNA.	1.32493	11.5079	14.2383	1.18305e-06	8.7569e-05	6.04095
TC0900003335.mm.2	NM_023738	Uba7	ubiquitin-like modifier activating enzyme 7	NM_023738	RefSeq	Mus musculus ubiquitin-like modifier activating enzyme 7 (Uba7), mRNA.	1.32296	8.17578	12.3924	3.19173e-06	0.000180905	4.95822
TC0400004170.mm.2	NM_021604	Agrn	agrin	NM_021604	RefSeq	Mus musculus agrin (Agrn), mRNA.	1.32257	9.46402	8.97376	3.05237e-05	0.00100099	2.4719
TC0500000221.mm.2	NM_016736	Nub1	negative regulator of ubiquitin-like proteins 1	NM_016736	RefSeq	Mus musculus negative regulator of ubiquitin-like proteins 1 (Nub1), transcript variant 2, mRNA.	1.31685	9.8004	14.2435	1.17995e-06	8.7569e-05	6.0438
TC0400000894.mm.2	NM_001161608	Gm13272	predicted gene 13272	NM_001161608	RefSeq	Mus musculus predicted gene 13272 (Gm13272), mRNA.	1.3046	7.11056	6.47056	0.000269019	0.00492868	0.0660213
TC0900001170.mm.2	NM_011636	Plscr1	phospholipid scramblase 1	NM_011636	RefSeq	Mus musculus phospholipid scramblase 1 (Plscr1), mRNA.	1.29794	6.90133	11.6613	4.91285e-06	0.00025352	4.4853
TC0900001720.mm.2	NM_007465	Birc2	baculoviral IAP repeat-containing 2	NM_007465	RefSeq	Mus musculus baculoviral IAP repeat-containing 2 (Birc2), transcript variant 1, mRNA.	1.29744	7.57926	13.042	2.2179e-06	0.000139785	5.35631
TC1100001004.mm.2	NM_009671	Ankfy1	ankyrin repeat and FYVE domain containing 1	NM_009671	RefSeq	Mus musculus ankyrin repeat and FYVE domain containing 1 (Ankfy1), mRNA.	1.29596	9.4989	13.8757	1.42358e-06	9.92896e-05	5.83972
TC1900000797.mm.2	NM_007611	Casp7	caspase 7	NM_007611	RefSeq	Mus musculus caspase 7 (Casp7), mRNA.	1.27867	7.06093	8.80449	3.47741e-05	0.00110592	2.3278
TC1300000009.mm.2	NM_001267724	Asb13	ankyrin repeat and SOCS box-containing 13	NM_001267724	RefSeq	Mus musculus ankyrin repeat and SOCS box-containing 13 (Asb13), transcript variant 3, mRNA.	1.27386	8.18328	10.495	1.03116e-05	0.000441704	3.66973
TC0400002980.mm.2	NM_007408	Plin2	perilipin 2	NM_007408	RefSeq	Mus musculus perilipin 2 (Plin2), mRNA.	1.27048	9.99552	10.6005	9.61423e-06	0.000420766	3.74688
TC0100001234.mm.2	NM_152895	Kdm5b	lysine (K)-specific demethylase 5B	NM_152895	RefSeq	Mus musculus lysine (K)-specific demethylase 5B (Kdm5b), mRNA.	1.26988	8.34647	12.0958	3.79106e-06	0.000208526	4.76968
TC0600002099.mm.2	NM_028421	Zc3hav1	zinc finger CCCH type, antiviral 1	NM_028421	RefSeq	Mus musculus zinc finger CCCH type, antiviral 1 (Zc3hav1), transcript variant 1, mRNA.	1.26614	9.75664	11.153	6.72882e-06	0.000320573	4.13965
TC1200000833.mm.2	NM_010234	Fos	FBJ osteosarcoma oncogene	NM_010234	RefSeq	Mus musculus FBJ osteosarcoma oncogene (Fos), mRNA.	1.2611	6.64899	8.37617	4.88355e-05	0.001415	1.95232
TC0600001252.mm.2	NM_134159	Il17rc	interleukin 17 receptor C	NM_134159	RefSeq	Mus musculus interleukin 17 receptor C (Il17rc), transcript variant 2, mRNA.	1.2583	9.73434	11.564	5.21264e-06	0.000263599	4.42025
TC1500000776.mm.2	NM_009775	Tspo	translocator protein	NM_009775	RefSeq	Mus musculus translocator protein (Tspo), mRNA.	1.25442	8.97393	12.8097	2.52127e-06	0.00015255	5.21622
TC1700000694.mm.2	NM_001008424	Cdsn	corneodesmosin	NM_001008424	RefSeq	Mus musculus corneodesmosin (Cdsn), mRNA.	1.2542	7.00622	8.46343	4.55185e-05	0.0013517	2.03011
TC1200000797.mm.2	NM_134188	Acot2	acyl-CoA thioesterase 2	NM_134188	RefSeq	Mus musculus acyl-CoA thioesterase 2 (Acot2), mRNA.	1.23445	9.91799	10.2299	1.233e-05	0.000505884	3.47269
TC0700004649.mm.2	NM_013520	Flt3l	FMS-like tyrosine kinase 3 ligand	NM_013520	RefSeq	Mus musculus FMS-like tyrosine kinase 3 ligand (Flt3l), transcript variant 1, mRNA.	1.23266	7.49155	12.44	3.10599e-06	0.000177461	4.98804
TC0700004553.mm.2	NM_008748	Dusp8	dual specificity phosphatase 8	NM_008748	RefSeq	Mus musculus dual specificity phosphatase 8 (Dusp8), mRNA.	1.23116	8.92216	10.7173	8.90377e-06	0.000393947	3.83143
TC0200002648.mm.2	NM_001163686	Dok5	docking protein 5	NM_001163686	RefSeq	Mus musculus docking protein 5 (Dok5), transcript variant 2, mRNA.	1.22803	7.50256	9.77973	1.68641e-05	0.000633767	3.12723
TC0700000390.mm.2	NM_001102613	Phldb3	pleckstrin homology-like domain, family B, member 3	NM_001102613	RefSeq	Mus musculus pleckstrin homology-like domain, family B, member 3 (Phldb3), mRNA.	1.22699	8.39966	10.1348	1.31599e-05	0.000529666	3.40087
TC1300000028.mm.2	NM_011803	Klf6	Kruppel-like factor 6	NM_011803	RefSeq	Mus musculus Kruppel-like factor 6 (Klf6), mRNA.	1.22435	10.0726	12.3078	3.35094e-06	0.000189485	4.90491
TC1100003462.mm.2	NM_001005341	Ypel2	yippee-like 2 (Drosophila)	NM_001005341	RefSeq	Mus musculus yippee-like 2 (Drosophila) (Ypel2), mRNA.	1.21692	7.43002	10.7639	8.63674e-06	0.000385657	3.86496
TC0100003804.mm.2	NM_007498	Atf3	activating transcription factor 3	NM_007498	RefSeq	Mus musculus activating transcription factor 3 (Atf3), mRNA.	1.21149	8.51439	8.96432	3.07447e-05	0.00100479	2.46393
TC0300003013.mm.2	NM_011932	Dapp1	dual adaptor for phosphotyrosine and 3-phosphoinositides 1	NM_011932	RefSeq	Mus musculus dual adaptor for phosphotyrosine and 3-phosphoinositides 1 (Dapp1), transcript variant 1, mRNA.	1.20818	7.34392	9.68595	1.80294e-05	0.000662137	3.05348
TC0400003360.mm.2	NR_024078	Btbd19	BTB (POZ) domain containing 19	NR_024078	RefSeq	Mus musculus BTB (POZ) domain containing 19 (Btbd19), long non-coding RNA.	1.20514	8.86548	7.07827	0.000150248	0.00325542	0.709515
TC1400001537.mm.2	NM_001110794	Anxa7	annexin A7	NM_001110794	RefSeq	Mus musculus annexin A7 (Anxa7), transcript variant 2, mRNA.	1.2003	8.7605	11.932	4.17604e-06	0.000224596	4.66362
TC1300001448.mm.2	NM_001199043	Lgals8	lectin, galactose binding, soluble 8	NM_001199043	RefSeq	Mus musculus lectin, galactose binding, soluble 8 (Lgals8), transcript variant 1, mRNA.	1.19962	10.3566	10.9089	7.86198e-06	0.000361054	3.96842
TC0100000681.mm.2	NM_026713	Mogat1	monoacylglycerol O-acyltransferase 1	NM_026713	RefSeq	Mus musculus monoacylglycerol O-acyltransferase 1 (Mogat1), mRNA.	1.19923	7.3785	9.05403	2.87145e-05	0.000955405	2.53943
TC1600000424.mm.2	NM_172822	Pigz	phosphatidylinositol glycan anchor biosynthesis, class Z	NM_172822	RefSeq	Mus musculus phosphatidylinositol glycan anchor biosynthesis, class Z (Pigz), mRNA.	1.19891	5.68342	8.37423	4.89122e-05	0.001415	1.95059
TC1200002267.mm.2	NM_001159502	Ddx24	DEAD (Asp-Glu-Ala-Asp) box polypeptide 24	NM_001159502	RefSeq	Mus musculus DEAD (Asp-Glu-Ala-Asp) box polypeptide 24 (Ddx24), transcript variant 1, mRNA.	1.1969	10.6963	11.411	5.7266e-06	0.00028357	4.31695
TC1100000286.mm.2	NM_027869	Pnpt1	polyribonucleotide nucleotidyltransferase 1	NM_027869	RefSeq	Mus musculus polyribonucleotide nucleotidyltransferase 1 (Pnpt1), mRNA.	1.18958	9.81571	13.1906	2.04553e-06	0.000131665	5.44465
TC1100003379.mm.2	NM_172796	Slfn9	schlafen 9	NM_172796	RefSeq	Mus musculus schlafen 9 (Slfn9), mRNA.	1.18705	9.41664	10.0648	1.38114e-05	0.000550683	3.34757
TC1100004242.mm.2	NM_145373	Sectm1a	secreted and transmembrane 1A	NM_145373	RefSeq	Mus musculus secreted and transmembrane 1A (Sectm1a), mRNA.	1.18165	6.91668	7.27173	0.000125824	0.00286277	0.905637
TC0900001774.mm.2	NM_177905	Piwil4	piwi-like RNA-mediated gene silencing 4	NM_177905	RefSeq	Mus musculus piwi-like RNA-mediated gene silencing 4 (Piwil4), mRNA.	1.18075	6.10171	11.3623	5.90225e-06	0.000288578	4.28375
TC1400002392.mm.2	NM_008410	Itm2b	integral membrane protein 2B	NM_008410	RefSeq	Mus musculus integral membrane protein 2B (Itm2b), mRNA.	1.1749	11.4226	12.7505	2.60583e-06	0.000156819	5.18016
TC0400001921.mm.2	NM_001287348	Nppb	natriuretic peptide type B	NM_001287348	RefSeq	Mus musculus natriuretic peptide type B (Nppb), transcript variant 2, mRNA.	1.16748	8.17192	10.1699	1.28465e-05	0.000523418	3.42745
TC0900001155.mm.2	NM_007801	Ctsh	cathepsin H	NM_007801	RefSeq	Mus musculus cathepsin H (Ctsh), transcript variant 1, mRNA.	1.15986	7.4973	10.3643	1.12564e-05	0.000472143	3.57313
TC0600003108.mm.2	NM_001097617	C1s1	complement component 1, s subcomponent 1	NM_001097617	RefSeq	Mus musculus complement component 1, s subcomponent 1 (C1s1), transcript variant 2, mRNA.	1.15864	6.34514	7.06542	0.000152048	0.0032856	0.696349
TC1700000707.mm.2	NM_001146710	Ppp1r18	protein phosphatase 1, regulatory subunit 18	NM_001146710	RefSeq	Mus musculus protein phosphatase 1, regulatory subunit 18 (Ppp1r18), transcript variant 2, mRNA.	1.15696	8.65933	10.8536	8.14774e-06	0.000369965	3.92913
TC0600002958.mm.2	NM_001168256	Tmem40	transmembrane protein 40	NM_001168256	RefSeq	Mus musculus transmembrane protein 40 (Tmem40), transcript variant 1, mRNA.	1.15611	7.38667	9.0655	2.8466e-05	0.000948945	2.54903
TC1400000575.mm.2	NM_001123371	Pnp2	purine-nucleoside phosphorylase 2	NM_001123371	RefSeq	Mus musculus purine-nucleoside phosphorylase 2 (Pnp2), mRNA.	1.14408	8.11417	11.8426	4.40457e-06	0.000232243	4.60517
TC0900002054.mm.2	NM_025289	Tbrg1	transforming growth factor beta regulated gene 1	NM_025289	RefSeq	Mus musculus transforming growth factor beta regulated gene 1 (Tbrg1), mRNA.	1.14298	10.8115	12.5536	2.91138e-06	0.000168972	5.05887
TC0500001011.mm.2	NM_001080798	Aff1	AF4/FMR2 family, member 1	NM_001080798	RefSeq	Mus musculus AF4/FMR2 family, member 1 (Aff1), transcript variant 1, mRNA.	1.14131	9.31027	9.58437	1.9395e-05	0.00070164	2.97288
TC0300001094.mm.2	NM_001163356	Fam212b	family with sequence similarity 212, member B	NM_001163356	RefSeq	Mus musculus family with sequence similarity 212, member B (Fam212b), transcript variant 2, mRNA.	1.14022	6.2201	7.83854	7.63777e-05	0.00199837	1.45769
TC0200004454.mm.2	NM_133838	Ehd4	EH-domain containing 4	NM_133838	RefSeq	Mus musculus EH-domain containing 4 (Ehd4), mRNA.	1.13779	9.12661	11.8361	4.42176e-06	0.000232599	4.6009
TC1300000763.mm.2	NR_029530	Mir23b	microRNA 23b	NR_029530	RefSeq	Mus musculus microRNA 23b (Mir23b), microRNA.	1.1362	7.18028	9.27688	2.42926e-05	0.000837508	2.7242
TC1000002580.mm.2	NM_177388	Slc41a2	solute carrier family 41, member 2	NM_177388	RefSeq	Mus musculus solute carrier family 41, member 2 (Slc41a2), mRNA.	1.13617	6.67612	8.76415	3.58826e-05	0.0011293	2.2931
TC0500002744.mm.2	NM_001276315	Cdkl2	cyclin-dependent kinase-like 2 (CDC2-related kinase)	NM_001276315	RefSeq	Mus musculus cyclin-dependent kinase-like 2 (CDC2-related kinase) (Cdkl2), transcript variant 3, mRNA.	1.13373	6.94054	8.76481	3.58642e-05	0.0011293	2.29367
TC0900001373.mm.2	NM_001243748	Rassf1	Ras association (RalGDS/AF-6) domain family member 1	NM_001243748	RefSeq	Mus musculus Ras association (RalGDS/AF-6) domain family member 1 (Rassf1), transcript variant 1, mRNA.	1.12945	8.6344	10.7443	8.74814e-06	0.000389913	3.85085
TC1300000607.mm.2	NM_011817	Gadd45g	growth arrest and DNA-damage-inducible 45 gamma	NM_011817	RefSeq	Mus musculus growth arrest and DNA-damage-inducible 45 gamma (Gadd45g), mRNA.	1.12701	6.40427	6.64259	0.000227208	0.00432983	0.252535
TC1300000586.mm.2	NM_175401	Fbxw17	F-box and WD-40 domain protein 17	NM_175401	RefSeq	Mus musculus F-box and WD-40 domain protein 17 (Fbxw17), mRNA.	1.12678	6.81248	10.8158	8.34992e-06	0.000375622	3.90214
TC0100002583.mm.2	NM_027154	Tmbim1	transmembrane BAX inhibitor motif containing 1	NM_027154	RefSeq	Mus musculus transmembrane BAX inhibitor motif containing 1 (Tmbim1), mRNA.	1.1196	8.93431	11.1642	6.68135e-06	0.000318939	4.14744
TC1400002368.mm.2	NM_207636	Fndc3a	fibronectin type III domain containing 3A	NM_207636	RefSeq	Mus musculus fibronectin type III domain containing 3A (Fndc3a), mRNA.	1.11589	9.81583	7.95219	6.93453e-05	0.00184631	1.56452
TC1000002657.mm.2	NM_001163504	Nr1h4	nuclear receptor subfamily 1, group H, member 4	NM_001163504	RefSeq	Mus musculus nuclear receptor subfamily 1, group H, member 4 (Nr1h4), transcript variant 2, mRNA.	1.11512	8.24515	9.01765	2.9519e-05	0.000970745	2.50889
TC1100003923.mm.2	NM_010494	Icam2	intercellular adhesion molecule 2	NM_010494	RefSeq	Mus musculus intercellular adhesion molecule 2 (Icam2), mRNA.	1.11501	6.0598	8.79926	3.49158e-05	0.00110751	2.3233
TC0600000849.mm.2	NM_144916	Tmem150a	transmembrane protein 150A	NM_144916	RefSeq	Mus musculus transmembrane protein 150A (Tmem150a), mRNA.	1.11294	7.89215	11.0711	7.08698e-06	0.000331758	4.08261
TC0X00002457.mm.2	NM_001099302	Gm5640	predicted gene 5640	NM_001099302	RefSeq	Mus musculus predicted gene 5640 (Gm5640), mRNA.	1.10958	6.8593	9.76693	1.70181e-05	0.000637571	3.11721
TC0700002974.mm.2	NM_030693	Atf5	activating transcription factor 5	NM_030693	RefSeq	Mus musculus activating transcription factor 5 (Atf5), transcript variant 1, mRNA.	1.10835	8.82208	10.3302	1.15183e-05	0.000481462	3.54777
TC0700003010.mm.2	NM_008654	Ppp1r15a	protein phosphatase 1, regulatory (inhibitor) subunit 15A	NM_008654	RefSeq	Mus musculus protein phosphatase 1, regulatory (inhibitor) subunit 15A (Ppp1r15a), mRNA.	1.10506	6.48133	8.13992	5.92636e-05	0.00163733	1.73828
TC1500001090.mm.2	NM_146064	Soat2	sterol O-acyltransferase 2	NM_146064	RefSeq	Mus musculus sterol O-acyltransferase 2 (Soat2), mRNA.	1.10218	6.00721	7.27279	0.000125703	0.00286277	0.906705
TC1300000560.mm.2	NM_013610	Ninj1	ninjurin 1	NM_013610	RefSeq	Mus musculus ninjurin 1 (Ninj1), mRNA.	1.10212	11.0363	8.79349	3.50725e-05	0.00111103	2.31835
TC1100003790.mm.2	NM_011486	Stat3	signal transducer and activator of transcription 3	NM_011486	RefSeq	Mus musculus signal transducer and activator of transcription 3 (Stat3), transcript variant 3, mRNA.	1.08727	8.98527	7.96595	6.85446e-05	0.00183103	1.57737
TC0400003731.mm.2	NM_001081047	Cnksr1	connector enhancer of kinase suppressor of Ras 1	NM_001081047	RefSeq	Mus musculus connector enhancer of kinase suppressor of Ras 1 (Cnksr1), mRNA.	1.0853	4.29294	8.41584	4.72949e-05	0.00138743	1.98777
TC0500003433.mm.2	NM_201373	Trim56	tripartite motif-containing 56	NM_201373	RefSeq	Mus musculus tripartite motif-containing 56 (Trim56), mRNA.	1.07949	10.0583	8.23959	5.45862e-05	0.00154152	1.82921
TC0600000228.mm.2	NM_001289663	Fam71f1	family with sequence similarity 71, member F1	NM_001289663	RefSeq	Mus musculus family with sequence similarity 71, member F1 (Fam71f1), transcript variant 1, mRNA.	1.0751	8.2682	9.60012	1.91758e-05	0.000696837	2.98542
TC1800000924.mm.2	NM_001110850	Crem	cAMP responsive element modulator	NM_001110850	RefSeq	Mus musculus cAMP responsive element modulator (Crem), transcript variant 4, mRNA.	1.06949	8.8981	9.57934	1.94655e-05	0.000703141	2.96887
TC1400001070.mm.2	NM_001177751	Tsc22d1	TSC22 domain family, member 1	NM_001177751	RefSeq	Mus musculus TSC22 domain family, member 1 (Tsc22d1), transcript variant 3, mRNA.	1.06629	11.0151	10.1588	1.29449e-05	0.000526544	3.41903
TC1700000881.mm.2	NM_001145979	Gtpbp2	GTP binding protein 2	NM_001145979	RefSeq	Mus musculus GTP binding protein 2 (Gtpbp2), transcript variant 2, mRNA.	1.06496	8.59398	8.14529	5.90005e-05	0.00163379	1.7432
TC0500002743.mm.2	NM_001271797	Rchy1	ring finger and CHY zinc finger domain containing 1	NM_001271797	RefSeq	Mus musculus ring finger and CHY zinc finger domain containing 1 (Rchy1), transcript variant 2, mRNA.	1.06316	9.84127	8.56054	4.21208e-05	0.00127585	2.11589
TC0600000923.mm.2	NM_001136227	Rtkn	rhotekin	NM_001136227	RefSeq	Mus musculus rhotekin (Rtkn), transcript variant 1, mRNA.	1.06076	9.63891	10.705	8.97562e-06	0.000396401	3.82258
TC0900003336.mm.2	ENSMUST00000035215	Cdhr4	cadherin-related family member 4	ENSMUST00000035215	ENSEMBL	cadherin-related family member 4 [gene_biotype:protein_coding transcript_biotype:retained_intron]	1.0569	8.17719	10.8489	8.17295e-06	0.000370415	3.92572
TC0400002220.mm.2	NM_177861	Tmem67	transmembrane protein 67	NM_177861	RefSeq	Mus musculus transmembrane protein 67 (Tmem67), transcript variant 1, mRNA.	1.05572	7.8805	7.30246	0.000122369	0.00281786	0.936423
TC0X00002084.mm.2	NM_001289727	Tmem255a	transmembrane protein 255A	NM_001289727	RefSeq	Mus musculus transmembrane protein 255A (Tmem255a), transcript variant 2, mRNA.	1.05019	6.95684	7.80376	7.86866e-05	0.00204551	1.42475
TC0700002417.mm.2	NM_153068	Ehd2	EH-domain containing 2	NM_153068	RefSeq	Mus musculus EH-domain containing 2 (Ehd2), mRNA.	1.05015	7.97804	7.61849	9.23849e-05	0.00230505	1.24725
TC0800000542.mm.2	NM_008391	Irf2	interferon regulatory factor 2	NM_008391	RefSeq	Mus musculus interferon regulatory factor 2 (Irf2), mRNA.	1.04948	8.55685	7.97187	6.82029e-05	0.00182392	1.5829
TC1400002059.mm.2	NM_010590	Ajuba	ajuba LIM protein	NM_010590	RefSeq	Mus musculus ajuba LIM protein (Ajuba), mRNA.	1.04858	9.63667	9.5454	1.99495e-05	0.000717919	2.94175
TC0600001769.mm.2	NM_001289661	2810474O19Rik	RIKEN cDNA 2810474O19 gene	NM_001289661	RefSeq	Mus musculus RIKEN cDNA 2810474O19 gene (2810474O19Rik), transcript variant 1, mRNA.	1.04433	9.74769	8.28295	5.26821e-05	0.00149474	1.86848
TC0100000103.mm.2	NM_001159711	Ly96	lymphocyte antigen 96	NM_001159711	RefSeq	Mus musculus lymphocyte antigen 96 (Ly96), transcript variant 2, mRNA.	1.03816	9.82546	6.80516	0.000194259	0.0038791	0.4256
TC0100003754.mm.2	NM_009367	Tgfb2	transforming growth factor, beta 2	NM_009367	RefSeq	Mus musculus transforming growth factor, beta 2 (Tgfb2), mRNA.	1.03502	8.51716	9.05292	2.87387e-05	0.000955405	2.53849
TC0900002305.mm.2	NM_007499	Atm	ataxia telangiectasia mutated	NM_007499	RefSeq	Mus musculus ataxia telangiectasia mutated (Atm), mRNA.	1.02327	7.92598	8.0845	6.20574e-05	0.00169516	1.68733
TC0200005114.mm.2	NM_011521	Sdc4	syndecan 4	NM_011521	RefSeq	Mus musculus syndecan 4 (Sdc4), mRNA.	1.021	9.82838	10.1528	1.29986e-05	0.000527839	3.41447
TC1300002013.mm.2	NM_017373	Nfil3	nuclear factor, interleukin 3, regulated	NM_017373	RefSeq	Mus musculus nuclear factor, interleukin 3, regulated (Nfil3), mRNA.	1.01399	7.70714	6.86658	0.000183231	0.00370783	0.490176
TC0100003057.mm.2	NM_019777	Ikbke	inhibitor of kappaB kinase epsilon	NM_019777	RefSeq	Mus musculus inhibitor of kappaB kinase epsilon (Ikbke), mRNA.	1.01346	8.14881	6.82505	0.00019061	0.00382198	0.446557
TC0100000541.mm.2	NM_001097644	Ccnyl1	cyclin Y-like 1	NM_001097644	RefSeq	Mus musculus cyclin Y-like 1 (Ccnyl1), mRNA.	1.01196	8.95062	9.06799	2.84123e-05	0.00094846	2.55112
TC0700004538.mm.2	NM_001177576	Slc25a22	solute carrier family 25 (mitochondrial carrier, glutamate), member 22	NM_001177576	RefSeq	Mus musculus solute carrier family 25 (mitochondrial carrier, glutamate), member 22 (Slc25a22), transcript variant 2, mRNA.	1.01015	8.09956	7.87316	7.4154e-05	0.00195065	1.49037
TC0300001081.mm.2	NM_007484	Rhoc	ras homolog gene family, member C	NM_007484	RefSeq	Mus musculus ras homolog gene family, member C (Rhoc), transcript variant 2, mRNA.	1.00737	11.0157	9.63859	1.86522e-05	0.000681903	3.01599
TC0500000131.mm.2	NM_013657	Sema3c	sema domain, immunoglobulin domain (Ig), short basic domain, secreted, (semaphorin) 3C	NM_013657	RefSeq	Mus musculus sema domain, immunoglobulin domain (Ig), short basic domain, secreted, (semaphorin) 3C (Sema3c), mRNA.	1.00646	6.55959	7.79227	7.94668e-05	0.00206137	1.41384
TC0300002665.mm.2	NM_001163332	Cttnbp2nl	CTTNBP2 N-terminal like	NM_001163332	RefSeq	Mus musculus CTTNBP2 N-terminal like (Cttnbp2nl), transcript variant 2, mRNA.	1.00118	8.97334	10.2296	1.23325e-05	0.000505884	3.47247
TC0800001915.mm.2	NM_173012	Letm2	leucine zipper-EF-hand containing transmembrane protein 2	NM_173012	RefSeq	Mus musculus leucine zipper-EF-hand containing transmembrane protein 2 (Letm2), mRNA.	1.00042	7.66173	8.48236	4.48326e-05	0.001342	2.0469
TC0600000609.mm.2	NM_001127348	Snx10	sorting nexin 10	NM_001127348	RefSeq	Mus musculus sorting nexin 10 (Snx10), transcript variant 2, mRNA.	0.998693	11.0708	10.603	9.59863e-06	0.000420766	3.74867
TC1400000076.mm.2	NM_145458	Pxk	PX domain containing serine/threonine kinase	NM_145458	RefSeq	Mus musculus PX domain containing serine/threonine kinase (Pxk), transcript variant L, mRNA.	0.998301	8.52319	9.93501	1.51164e-05	0.000583977	3.24797
TC1600000861.mm.2	NM_013918	Usp25	ubiquitin specific peptidase 25	NM_013918	RefSeq	Mus musculus ubiquitin specific peptidase 25 (Usp25), mRNA.	0.997966	10.5424	8.73202	3.67943e-05	0.00115051	2.26537
TC0300003210.mm.2	NM_001113420	Schip1	schwannomin interacting protein 1	NM_001113420	RefSeq	Mus musculus schwannomin interacting protein 1 (Schip1), transcript variant 2, mRNA.	0.997594	6.69534	7.50539	0.000102051	0.0024758	1.1372
TC0500001615.mm.2	NM_011962	Plod3	procollagen-lysine, 2-oxoglutarate 5-dioxygenase 3	NM_011962	RefSeq	Mus musculus procollagen-lysine, 2-oxoglutarate 5-dioxygenase 3 (Plod3), mRNA.	0.997165	8.48077	6.58549	0.000240222	0.00453498	0.191026
TC1500001101.mm.2	NM_001170911	Prr13	proline rich 13	NM_001170911	RefSeq	Mus musculus proline rich 13 (Prr13), transcript variant 2, mRNA.	0.996236	10.115	8.16113	5.82315e-05	0.00161991	1.75771
TC1000002320.mm.2	NM_023598	Arid5b	AT rich interactive domain 5B (MRF1-like)	NM_023598	RefSeq	Mus musculus AT rich interactive domain 5B (MRF1-like) (Arid5b), mRNA.	0.993994	10.0738	9.18772	2.59628e-05	0.000885002	2.65074
TC1900001070.mm.2	NM_026329	Polr2g	polymerase (RNA) II (DNA directed) polypeptide G	NM_026329	RefSeq	Mus musculus polymerase (RNA) II (DNA directed) polypeptide G (Polr2g), mRNA.	0.990513	10.0911	10.0772	1.3693e-05	0.000547765	3.35707
TC0200004589.mm.2	ENSMUST00000099385	Gm10762	predicted gene 10762 [Source:MGI Symbol;Acc:MGI:3704209]	ENSMUST00000099385	ENSEMBL	predicted gene 10762 [gene_biotype:protein_coding transcript_biotype:protein_coding]	0.988436	7.1249	7.30765	0.000121796	0.00280735	0.941608
TC0500003314.mm.2	NM_133768	Asl	argininosuccinate lyase	NM_133768	RefSeq	Mus musculus argininosuccinate lyase (Asl), mRNA.	0.985852	9.21863	8.2457	5.43132e-05	0.00153741	1.83475
TC0400001708.mm.2	NM_008305	Hspg2	perlecan (heparan sulfate proteoglycan 2)	NM_008305	RefSeq	Mus musculus perlecan (heparan sulfate proteoglycan 2) (Hspg2), mRNA.	0.984735	9.28522	8.15604	5.84775e-05	0.00162488	1.75305
TC0500002231.mm.2	NM_010753	Mxd4	Max dimerization protein 4	NM_010753	RefSeq	Mus musculus Max dimerization protein 4 (Mxd4), mRNA.	0.984674	8.35479	7.35867	0.000116321	0.00272001	0.992465
TC0300002492.mm.2	NM_023320	Plekho1	pleckstrin homology domain containing, family O member 1	NM_023320	RefSeq	Mus musculus pleckstrin homology domain containing, family O member 1 (Plekho1), mRNA.	0.981877	10.2949	9.56424	1.96791e-05	0.000709798	2.95682
TC0200005472.mm.2	NM_001146348	Eng	endoglin	NM_001146348	RefSeq	Mus musculus endoglin (Eng), transcript variant 3, mRNA.	0.981677	11.3827	9.95485	1.49081e-05	0.000580944	3.26328
TC0500003468.mm.2	NM_080450	Gjc3	gap junction protein, gamma 3	NM_080450	RefSeq	Mus musculus gap junction protein, gamma 3 (Gjc3), mRNA.	0.980348	11.6518	9.10699	2.7587e-05	0.000927308	2.58369
TC0200004545.mm.2	NM_023220	Sppl2a	signal peptide peptidase like 2A	NM_023220	RefSeq	Mus musculus signal peptide peptidase like 2A (Sppl2a), mRNA.	0.978437	10.9516	8.13023	5.97415e-05	0.00164323	1.7294
TC1800001005.mm.2	NM_145492	Zfp521	zinc finger protein 521	NM_145492	RefSeq	Mus musculus zinc finger protein 521 (Zfp521), mRNA.	0.975621	8.19635	10.5282	1.00864e-05	0.000434363	3.69406
TC1800001181.mm.2	NM_001289591	Tmem173	transmembrane protein 173	NM_001289591	RefSeq	Mus musculus transmembrane protein 173 (Tmem173), transcript variant 2, mRNA.	0.968587	9.26964	8.88945	3.25628e-05	0.00105218	2.40042
TC0900002519.mm.2	NM_001170907	Trip4	thyroid hormone receptor interactor 4	NM_001170907	RefSeq	Mus musculus thyroid hormone receptor interactor 4 (Trip4), transcript variant 2, mRNA.	0.963816	5.71088	9.76704	1.70168e-05	0.000637571	3.11729
TC1600000376.mm.2	NM_001159317	Il1rap	interleukin 1 receptor accessory protein	NM_001159317	RefSeq	Mus musculus interleukin 1 receptor accessory protein (Il1rap), transcript variant 3, mRNA.	0.962163	8.41807	8.74669	3.63749e-05	0.00113887	2.27804
TC0100000224.mm.2	NM_011206	Ptpn18	protein tyrosine phosphatase, non-receptor type 18	NM_011206	RefSeq	Mus musculus protein tyrosine phosphatase, non-receptor type 18 (Ptpn18), mRNA.	0.959286	6.68273	8.34756	4.99816e-05	0.00143835	1.92667
TC0400000439.mm.2	NM_013497	Creb3	cAMP responsive element binding protein 3	NM_013497	RefSeq	Mus musculus cAMP responsive element binding protein 3 (Creb3), mRNA.	0.955328	10.2904	7.58547	9.50962e-05	0.00235089	1.21526
TC1900000517.mm.2	NM_029508	Pcgf5	polycomb group ring finger 5	NM_029508	RefSeq	Mus musculus polycomb group ring finger 5 (Pcgf5), mRNA.	0.951124	7.95491	7.20081	0.000134221	0.00301058	0.834212
TC1500000654.mm.2	NM_027219	Cdc42ep1	CDC42 effector protein (Rho GTPase binding) 1	NM_027219	RefSeq	Mus musculus CDC42 effector protein (Rho GTPase binding) 1 (Cdc42ep1), mRNA.	0.950444	8.65864	9.52446	2.02548e-05	0.000724086	2.92498
TC0X00002995.mm.2	NM_013463	Gla	galactosidase, alpha	NM_013463	RefSeq	Mus musculus galactosidase, alpha (Gla), mRNA.	0.947706	8.57409	10.5072	1.02284e-05	0.000438915	3.67866
TC1300002249.mm.2	NM_177712	Zfp874a	zinc finger protein 874a	NM_177712	RefSeq	Mus musculus zinc finger protein 874a (Zfp874a), mRNA.	0.944228	7.51705	8.07493	6.25549e-05	0.00170682	1.6785
TC0100001409.mm.2	NM_001160180	Tor1aip2	torsin A interacting protein 2	NM_001160180	RefSeq	Mus musculus torsin A interacting protein 2 (Tor1aip2), transcript variant 1, mRNA.	0.940718	11.5865	9.90626	1.5424e-05	0.000591587	3.22574
TC0500002722.mm.2	NM_001033310	Cox18	cytochrome c oxidase assembly protein 18	NM_001033310	RefSeq	Mus musculus cytochrome c oxidase assembly protein 18 (Cox18), transcript variant 2, mRNA.	0.940296	9.16183	6.44363	0.00027631	0.00503559	0.0364993
TC0200003560.mm.2	NM_001139509	Nr4a2	nuclear receptor subfamily 4, group A, member 2	NM_001139509	RefSeq	Mus musculus nuclear receptor subfamily 4, group A, member 2 (Nr4a2), transcript variant 2, mRNA.	0.937469	7.44334	8.19586	5.65854e-05	0.0015845	1.78943
TC0600001258.mm.2	NM_001113553	Irak2	interleukin-1 receptor-associated kinase 2	NM_001113553	RefSeq	Mus musculus interleukin-1 receptor-associated kinase 2 (Irak2), transcript variant 2, mRNA.	0.936332	6.10026	7.43798	0.000108349	0.0025835	1.07098
TC1100003997.mm.2	NM_013851	Abca8b	ATP-binding cassette, sub-family A (ABC1), member 8b	NM_013851	RefSeq	Mus musculus ATP-binding cassette, sub-family A (ABC1), member 8b (Abca8b), mRNA.	0.935783	6.87301	9.11161	2.7491e-05	0.000925366	2.58754
TC1000000171.mm.2	NM_001161845	Sgk1	serum/glucocorticoid regulated kinase 1	NM_001161845	RefSeq	Mus musculus serum/glucocorticoid regulated kinase 1 (Sgk1), transcript variant 1, mRNA.	0.934817	6.57111	7.38315	0.000113792	0.00267118	1.01678
TC1500002042.mm.2	NM_027081	Dennd6b	DENN/MADD domain containing 6B	NM_027081	RefSeq	Mus musculus DENN/MADD domain containing 6B (Dennd6b), mRNA.	0.933982	6.22524	6.84323	0.00018734	0.00377454	0.465676
TC0700003998.mm.2	NR_030719	Gm8979	very large inducible GTPase 1 pseudogene	NR_030719	RefSeq	Mus musculus predicted gene 8979 (Gm8979), non-coding RNA.	0.932929	4.37935	8.47854	4.497e-05	0.001342	2.04351
TC0700004007.mm.2	uc012frt.1	Gm8989	very large inducible GTPase 1 pseudogene	uc012frt.1	UCSC Genes	Mus musculus predicted gene 8989 (Gm8989), non-coding RNA.	0.932929	4.37935	8.47854	4.497e-05	0.001342	2.04351
TC1900001710.mm.2	NM_001177796	Afap1l2	actin filament associated protein 1-like 2	NM_001177796	RefSeq	Mus musculus actin filament associated protein 1-like 2 (Afap1l2), transcript variant 1, mRNA.	0.931264	6.82688	7.24699	0.000128684	0.00291339	0.880785
TC1400002054.mm.2	NM_001253679	Slc7a7	solute carrier family 7 (cationic amino acid transporter, y+ system), member 7	NM_001253679	RefSeq	Mus musculus solute carrier family 7 (cationic amino acid transporter, y+ system), member 7 (Slc7a7), transcript variant 2, mRNA.	0.925984	7.47662	9.2957	2.39558e-05	0.000827072	2.73963
TC0300002324.mm.2	NM_018804	Syt11	synaptotagmin XI	NM_018804	RefSeq	Mus musculus synaptotagmin XI (Syt11), mRNA.	0.924699	7.80634	7.69145	8.66942e-05	0.00220165	1.31756
TC0800002577.mm.2	NM_172503	Zswim4	zinc finger SWIM-type containing 4	NM_172503	RefSeq	Mus musculus zinc finger SWIM-type containing 4 (Zswim4), mRNA.	0.923599	8.9779	9.40072	2.21698e-05	0.000774249	2.82521
TC1900000664.mm.2	NM_001178012	Sfxn3	sideroflexin 3	NM_001178012	RefSeq	Mus musculus sideroflexin 3 (Sfxn3), transcript variant 2, mRNA.	0.92337	8.13778	7.69354	8.65372e-05	0.00219997	1.31957
TC0100001755.mm.2	NM_181732	Aida	axin interactor, dorsalization associated	NM_181732	RefSeq	Mus musculus axin interactor, dorsalization associated (Aida), mRNA.	0.922126	10.4643	8.13417	5.95465e-05	0.00164318	1.73302
TC1300002250.mm.2	NM_001076791	Zfp874b	zinc finger protein 874b	NM_001076791	RefSeq	Mus musculus zinc finger protein 874b (Zfp874b), mRNA.	0.917758	7.05252	8.88721	3.26191e-05	0.0010524	2.39851
TC1200001990.mm.2	NM_134156	Actn1	actinin, alpha 1	NM_134156	RefSeq	Mus musculus actinin, alpha 1 (Actn1), mRNA.	0.910565	9.29099	9.03982	2.90258e-05	0.000962306	2.52751
TC0100001724.mm.2	NM_144794	Tmem63a	transmembrane protein 63a	NM_144794	RefSeq	Mus musculus transmembrane protein 63a (Tmem63a), mRNA.	0.907566	9.01452	9.07838	2.81899e-05	0.000942336	2.5598
TC1100003517.mm.2	NM_008711	Nog	noggin	NM_008711	RefSeq	Mus musculus noggin (Nog), mRNA.	0.903448	6.56979	7.24546	0.000128863	0.00291471	0.87925
TC0100001254.mm.2	NM_013750	Phlda3	pleckstrin homology-like domain, family A, member 3	NM_013750	RefSeq	Mus musculus pleckstrin homology-like domain, family A, member 3 (Phlda3), mRNA.	0.889421	8.84797	8.03028	6.49348e-05	0.00175429	1.63721
TC0800002529.mm.2	NM_021356	Gab1	growth factor receptor bound protein 2-associated protein 1	NM_021356	RefSeq	Mus musculus growth factor receptor bound protein 2-associated protein 1 (Gab1), transcript variant 2, mRNA.	0.88333	7.51111	8.59469	4.09944e-05	0.00124798	2.14586
TC0700003844.mm.2	NM_001122739	Inppl1	inositol polyphosphate phosphatase-like 1	NM_001122739	RefSeq	Mus musculus inositol polyphosphate phosphatase-like 1 (Inppl1), transcript variant 2, mRNA.	0.881682	10.2014	8.56567	4.19493e-05	0.00127225	2.1204
TC1900000078.mm.2	NM_009045	Rela	v-rel reticuloendotheliosis viral oncogene homolog A (avian)	NM_009045	RefSeq	Mus musculus v-rel reticuloendotheliosis viral oncogene homolog A (avian) (Rela), mRNA.	0.879418	10.8636	8.78954	3.51804e-05	0.00111153	2.31496
TC1300002774.mm.2	NM_001001186	Zfp456	zinc finger protein 456	NM_001001186	RefSeq	Mus musculus zinc finger protein 456 (Zfp456), mRNA.	0.878527	5.57376	7.42411	0.000109697	0.0026054	1.0573
TC0900002887.mm.2	NM_175537	Zbtb38	zinc finger and BTB domain containing 38	NM_175537	RefSeq	Mus musculus zinc finger and BTB domain containing 38 (Zbtb38), mRNA.	0.876671	10.2129	8.45075	4.59844e-05	0.00136053	2.01884
TC0300002938.mm.2	NM_025779	Ccdc109b	coiled-coil domain containing 109B	NM_025779	RefSeq	Mus musculus coiled-coil domain containing 109B (Ccdc109b), transcript variant 1, mRNA.	0.871715	6.24815	8.09403	6.15667e-05	0.00168556	1.69611
TC0700002786.mm.2	NM_001111073	Fxyd5	FXYD domain-containing ion transport regulator 5	NM_001111073	RefSeq	Mus musculus FXYD domain-containing ion transport regulator 5 (Fxyd5), transcript variant 1, mRNA.	0.869306	9.23266	8.06968	6.28296e-05	0.00171239	1.67366
TC1800000179.mm.2	NM_001285807	Dtna	dystrobrevin alpha	NM_001285807	RefSeq	Mus musculus dystrobrevin alpha (Dtna), transcript variant 1, mRNA.	0.869086	8.94639	7.01109	0.000159935	0.00338352	0.640455
TC1300001779.mm.2	NM_009450	Tubb2a	tubulin, beta 2A class IIA	NM_009450	RefSeq	Mus musculus tubulin, beta 2A class IIA (Tubb2a), mRNA.	0.866167	7.92657	6.47278	0.000268428	0.00492532	0.0684479
TC0400001647.mm.2	NM_026780	Syf2	SYF2 homolog, RNA splicing factor (S. cerevisiae)	NM_026780	RefSeq	Mus musculus SYF2 homolog, RNA splicing factor (S. cerevisiae) (Syf2), mRNA.	0.865968	8.29119	7.87194	7.42312e-05	0.00195065	1.48922
TC1100001628.mm.2	NM_001146318	Cnp	2,3-cyclic nucleotide 3 phosphodiesterase	NM_001146318	RefSeq	Mus musculus 2,3-cyclic nucleotide 3 phosphodiesterase (Cnp), transcript variant 1, mRNA.	0.865632	7.72306	7.8162	7.78516e-05	0.00202939	1.43655
TC0300000732.mm.2	NM_001198911	Arhgef2	rho/rac guanine nucleotide exchange factor (GEF) 2	NM_001198911	RefSeq	Mus musculus rho/rac guanine nucleotide exchange factor (GEF) 2 (Arhgef2), transcript variant 2, mRNA.	0.863623	10.5165	8.80884	3.4657e-05	0.00110364	2.33152
TC0100001252.mm.2	NM_007791	Csrp1	cysteine and glycine-rich protein 1	NM_007791	RefSeq	Mus musculus cysteine and glycine-rich protein 1 (Csrp1), mRNA.	0.862346	11.7027	8.64589	3.93684e-05	0.00120913	2.19061
TC1800001222.mm.2	NM_001205336	Arap3	ArfGAP with RhoGAP domain, ankyrin repeat and PH domain 3	NM_001205336	RefSeq	Mus musculus ArfGAP with RhoGAP domain, ankyrin repeat and PH domain 3 (Arap3), transcript variant 2, mRNA.	0.862212	6.11013	7.92068	7.12197e-05	0.00188791	1.53502
TC1100000585.mm.2	NM_001166653	Cdkl3	cyclin-dependent kinase-like 3	NM_001166653	RefSeq	Mus musculus cyclin-dependent kinase-like 3 (Cdkl3), transcript variant 1, mRNA.	0.861019	8.44203	8.7648	3.58647e-05	0.0011293	2.29366
TC0500000992.mm.2	NM_173370	Cds1	CDP-diacylglycerol synthase 1	NM_173370	RefSeq	Mus musculus CDP-diacylglycerol synthase 1 (Cds1), mRNA.	0.858376	3.67346	6.49767	0.000261895	0.00484868	0.0956471
TC0900002358.mm.2	NM_198673	Odf3l1	outer dense fiber of sperm tails 3-like 1	NM_198673	RefSeq	Mus musculus outer dense fiber of sperm tails 3-like 1 (Odf3l1), mRNA.	0.855022	8.63882	6.49596	0.000262338	0.00484868	0.0937848
TC0500003585.mm.2	NM_001038627	Smurf1	SMAD specific E3 ubiquitin protein ligase 1	NM_001038627	RefSeq	Mus musculus SMAD specific E3 ubiquitin protein ligase 1 (Smurf1), transcript variant 1, mRNA.	0.851459	9.16312	8.83006	3.40913e-05	0.00109137	2.34972
TC1200000279.mm.2	NM_021524	Nampt	nicotinamide phosphoribosyltransferase	NM_021524	RefSeq	Mus musculus nicotinamide phosphoribosyltransferase (Nampt), mRNA.	0.851023	9.91833	8.40254	4.78052e-05	0.00139732	1.9759
TC1300000958.mm.2	NM_001042591	Arrdc3	arrestin domain containing 3	NM_001042591	RefSeq	Mus musculus arrestin domain containing 3 (Arrdc3), mRNA.	0.846016	8.52488	7.84407	7.60176e-05	0.00199326	1.46292
TC1700002816.mm.2	NM_001142706	Cfb	complement factor B	NM_001142706	RefSeq	Mus musculus complement factor B (Cfb), transcript variant 2, mRNA.	0.844443	6.14014	6.94283	0.000170499	0.00352987	0.569763
TC0100001581.mm.2	NM_172845	Adamts4	a disintegrin-like and metallopeptidase (reprolysin type) with thrombospondin type 1 motif, 4	NM_172845	RefSeq	Mus musculus a disintegrin-like and metallopeptidase (reprolysin type) with thrombospondin type 1 motif, 4 (Adamts4), mRNA.	0.84044	8.18155	7.40595	0.000111492	0.00262995	1.03935
TC1100000916.mm.2	NM_001127233	Trp53	transformation related protein 53	NM_001127233	RefSeq	Mus musculus transformation related protein 53 (Trp53), transcript variant 2, mRNA.	0.836426	10.9107	7.50407	0.000102171	0.0024758	1.1359
TC1500001870.mm.2	NM_001253817	Tmem184b	transmembrane protein 184b	NM_001253817	RefSeq	Mus musculus transmembrane protein 184b (Tmem184b), transcript variant 2, mRNA.	0.834613	10.5738	8.48021	4.491e-05	0.001342	2.04499
TC1700001987.mm.2	NM_025878	Mrps18b	mitochondrial ribosomal protein S18B	NM_025878	RefSeq	Mus musculus mitochondrial ribosomal protein S18B (Mrps18b), mRNA.	0.834607	9.19734	7.57071	9.63374e-05	0.00236466	1.20092
TC1700000751.mm.2	NM_029602	Znrd1as	Znrd1 antisense	NM_029602	RefSeq	Mus musculus Znrd1 antisense (Znrd1as), mRNA.	0.834155	7.33915	8.29575	5.21343e-05	0.00148617	1.88003
TC0300000411.mm.2	NM_019995	Supt20	suppressor of Ty 20	NM_019995	RefSeq	Mus musculus suppressor of Ty 20 (Supt20), mRNA.	0.83209	8.56142	6.78341	0.000198341	0.00393464	0.402625
TC1700000703.mm.2	NM_133662	Ier3	immediate early response 3	NM_133662	RefSeq	Mus musculus immediate early response 3 (Ier3), mRNA.	0.829128	9.33161	7.14773	0.000140916	0.00311457	0.780396
TC1100001688.mm.2	NM_008175	Grn	granulin	NM_008175	RefSeq	Mus musculus granulin (Grn), mRNA.	0.828765	10.7448	7.57792	9.5729e-05	0.0023569	1.20792
TC1200002524.mm.2	NM_001033335	Serpina3f	serine (or cysteine) peptidase inhibitor, clade A, member 3F	NM_001033335	RefSeq	Mus musculus serine (or cysteine) peptidase inhibitor, clade A, member 3F (Serpina3f), transcript variant 2, mRNA.	0.828337	4.84763	7.42452	0.000109657	0.0026054	1.0577
TC0700002507.mm.2	NM_027514	Pvr	poliovirus receptor	NM_027514	RefSeq	Mus musculus poliovirus receptor (Pvr), mRNA.	0.828112	10.0154	6.84166	0.00018762	0.00377454	0.464025
TC1000001183.mm.2	NM_007569	Btg1	B cell translocation gene 1, anti-proliferative	NM_007569	RefSeq	Mus musculus B cell translocation gene 1, anti-proliferative (Btg1), mRNA.	0.82755	8.86741	6.84205	0.000187549	0.00377454	0.46444
TC1300000602.mm.2	NM_029279	Secisbp2	SECIS binding protein 2	NM_029279	RefSeq	Mus musculus SECIS binding protein 2 (Secisbp2), transcript variant 1, mRNA.	0.826805	8.13525	8.70963	3.74446e-05	0.00116546	2.246
TC0X00001798.mm.2	NM_001166437	Tbc1d25	TBC1 domain family, member 25	NM_001166437	RefSeq	Mus musculus TBC1 domain family, member 25 (Tbc1d25), transcript variant 2, mRNA.	0.826171	7.55737	7.02858	0.000157347	0.0033483	0.658483
TC0100002600.mm.2	NM_026977	Cnppd1	cyclin Pas1/PHO80 domain containing 1	NM_026977	RefSeq	Mus musculus cyclin Pas1/PHO80 domain containing 1 (Cnppd1), mRNA.	0.824709	8.75541	6.59273	0.000238527	0.00451003	0.198843
TC1200001988.mm.2	NM_007564	Zfp36l1	zinc finger protein 36, C3H type-like 1	NM_007564	RefSeq	Mus musculus zinc finger protein 36, C3H type-like 1 (Zfp36l1), mRNA.	0.822048	10.0006	7.6429	9.04356e-05	0.00227755	1.27083
TC0200004973.mm.2	NM_010579	Eif6	eukaryotic translation initiation factor 6	NM_010579	RefSeq	Mus musculus eukaryotic translation initiation factor 6 (Eif6), mRNA.	0.819424	9.96332	6.74667	0.000205457	0.00403936	0.363689
TC0400000696.mm.2	NM_025286	Slc31a2	solute carrier family 31, member 2	NM_025286	RefSeq	Mus musculus solute carrier family 31, member 2 (Slc31a2), transcript variant 1, mRNA.	0.818835	8.30613	7.51052	0.000101589	0.00246853	1.14222
TC0900003004.mm.2	NM_020559	Alas1	aminolevulinic acid synthase 1	NM_020559	RefSeq	Mus musculus aminolevulinic acid synthase 1 (Alas1), transcript variant 2, mRNA.	0.815692	8.98524	7.29151	0.000123587	0.00283513	0.925469
TC1700002788.mm.2	NM_023124	H2-Q8	histocompatibility 2, Q region locus 8	NM_023124	RefSeq	Mus musculus histocompatibility 2, Q region locus 8 (H2-Q8), mRNA.	0.815319	5.41042	7.32996	0.000119367	0.00276452	0.963885
TC0300002939.mm.2	NM_207209	Sec24b	Sec24 related gene family, member B (S. cerevisiae)	NM_207209	RefSeq	Mus musculus Sec24 related gene family, member B (S. cerevisiae) (Sec24b), mRNA.	0.814877	9.09428	7.70973	8.5331e-05	0.00217616	1.33509
TC1700002107.mm.2	NM_027834	9130008F23Rik	RIKEN cDNA 9130008F23 gene	NM_027834	RefSeq	Mus musculus RIKEN cDNA 9130008F23 gene (9130008F23Rik), mRNA.	0.8144	7.28482	7.12855	0.000143426	0.00314991	0.760878
TC1700000419.mm.2	NM_029870	Crebrf	CREB3 regulatory factor	NM_029870	RefSeq	Mus musculus CREB3 regulatory factor (Crebrf), mRNA.	0.813479	6.21195	6.88061	0.000180811	0.00367729	0.504872
TC0500000008.mm.2	NM_009873	Cdk6	cyclin-dependent kinase 6	NM_009873	RefSeq	Mus musculus cyclin-dependent kinase 6 (Cdk6), mRNA.	0.812702	10.2747	6.97992	0.000164665	0.0034534	0.608241
TC0400000367.mm.2	NM_023305	Ubap1	ubiquitin-associated protein 1	NM_023305	RefSeq	Mus musculus ubiquitin-associated protein 1 (Ubap1), transcript variant 1, mRNA.	0.812362	10.5054	8.54618	4.26046e-05	0.00128729	2.10326
TC0700002148.mm.2	NM_021454	Cdc42ep5	CDC42 effector protein (Rho GTPase binding) 5	NM_021454	RefSeq	Mus musculus CDC42 effector protein (Rho GTPase binding) 5 (Cdc42ep5), mRNA.	0.811435	8.87876	7.89098	7.3038e-05	0.00192766	1.50714
TC1700000904.mm.2	NM_178385	Tbcc	tubulin-specific chaperone C	NM_178385	RefSeq	Mus musculus tubulin-specific chaperone C (Tbcc), mRNA.	0.810587	9.11733	7.27497	0.000125455	0.00286277	0.908887
TC1700001938.mm.2	BC027314	D17H6S56E-5	DNA segment, Chr 17, human D6S56E 5	BC027314	GenBank	Mus musculus DNA segment, Chr 17, human D6S56E 5, mRNA (cDNA clone MGC:28170 IMAGE:3985942), complete cds.	0.806198	9.34583	6.57121	0.000243607	0.00458816	0.175572
TC1800001512.mm.2	NM_001127177	Ptpn2	protein tyrosine phosphatase, non-receptor type 2	NM_001127177	RefSeq	Mus musculus protein tyrosine phosphatase, non-receptor type 2 (Ptpn2), transcript variant 2, mRNA.	0.805556	9.5662	7.44032	0.000108123	0.0025832	1.07329
TC1200000865.mm.2	NM_001289429	Cipc	CLOCK interacting protein, circadian	NM_001289429	RefSeq	Mus musculus CLOCK interacting protein, circadian (Cipc), transcript variant 2, mRNA.	0.805011	9.90328	7.31678	0.000120795	0.00278749	0.950734
TC0900003339.mm.2	NM_023483	1110032A03Rik	RIKEN cDNA 1110032A03 gene	NM_023483	RefSeq	Mus musculus RIKEN cDNA 1110032A03 gene (1110032A03Rik), transcript variant 1, mRNA.	0.802576	7.94498	7.94607	6.97051e-05	0.00185385	1.5588
TC1300001886.mm.2	NM_001081059	Mcur1	mitochondrial calcium uniporter regulator 1	NM_001081059	RefSeq	Mus musculus mitochondrial calcium uniporter regulator 1 (Mcur1), mRNA.	0.793818	7.71651	6.77068	0.000200777	0.00397968	0.389144
TC1700002647.mm.2	NM_001001806	Zfp36l2	zinc finger protein 36, C3H type-like 2	NM_001001806	RefSeq	Mus musculus zinc finger protein 36, C3H type-like 2 (Zfp36l2), mRNA.	0.79273	9.069	6.47789	0.000267072	0.0049116	0.0740405
TC0200005462.mm.2	NM_009849	Entpd2	ectonucleoside triphosphate diphosphohydrolase 2	NM_009849	RefSeq	Mus musculus ectonucleoside triphosphate diphosphohydrolase 2 (Entpd2), mRNA.	0.792307	7.80621	8.02607	6.51642e-05	0.00175429	1.63331
TC0700002705.mm.2	NM_010908	Nfkbib	nuclear factor of kappa light polypeptide gene enhancer in B cells inhibitor, beta	NM_010908	RefSeq	Mus musculus nuclear factor of kappa light polypeptide gene enhancer in B cells inhibitor, beta (Nfkbib), transcript variant 1, mRNA.	0.78895	10.6045	6.80089	0.000195055	0.00388856	0.421086
TC0300002325.mm.2	NR_015498	1500004A13Rik	RIKEN cDNA 1500004A13 gene	NR_015498	RefSeq	Mus musculus RIKEN cDNA 1500004A13 gene (1500004A13Rik), long non-coding RNA.	0.785456	7.39303	6.49662	0.000262166	0.00484868	0.0945052
TC0500002760.mm.2	NM_007644	Scarb2	scavenger receptor class B, member 2	NM_007644	RefSeq	Mus musculus scavenger receptor class B, member 2 (Scarb2), mRNA.	0.78321	9.43115	7.43507	0.00010863	0.00258515	1.06811
TC1900000527.mm.2	NM_001164336	2018-03-05	membrane-associated ring finger (C3HC4) 5	NM_001164336	RefSeq	Mus musculus membrane-associated ring finger (C3HC4) 5 (March5), transcript variant 2, mRNA.	0.78282	10.7103	8.14357	5.90841e-05	0.00163423	1.74164
TC1700002774.mm.2	NM_028791	Cmtr1	cap methyltransferase 1	NM_028791	RefSeq	Mus musculus cap methyltransferase 1 (Cmtr1), mRNA.	0.777223	9.47978	8.42237	4.70468e-05	0.00138519	1.99359
TC1800000396.mm.2	NM_001164621	Rnf14	ring finger protein 14	NM_001164621	RefSeq	Mus musculus ring finger protein 14 (Rnf14), transcript variant 1, mRNA.	0.776048	10.7826	8.20255	5.62742e-05	0.00157999	1.79553
TC1000000050.mm.2	NM_011835	Katna1	katanin p60 (ATPase-containing) subunit A1	NM_011835	RefSeq	Mus musculus katanin p60 (ATPase-containing) subunit A1 (Katna1), mRNA.	0.775807	8.76549	7.14063	0.000141839	0.00312617	0.773179
TC1500000031.mm.2	NM_001008702	Dab2	disabled 2, mitogen-responsive phosphoprotein	NM_001008702	RefSeq	Mus musculus disabled 2, mitogen-responsive phosphoprotein (Dab2), transcript variant 2, mRNA.	0.775523	9.4665	6.99312	0.000162644	0.00342585	0.621891
TC0200004913.mm.2	NM_001289716	Bcl2l1	BCL2-like 1	NM_001289716	RefSeq	Mus musculus BCL2-like 1 (Bcl2l1), transcript variant 1, mRNA.	0.774372	9.55403	7.41674	0.000110421	0.00261233	1.05002
TC0500000532.mm.2	NM_025951	Pi4k2b	phosphatidylinositol 4-kinase type 2 beta	NM_025951	RefSeq	Mus musculus phosphatidylinositol 4-kinase type 2 beta (Pi4k2b), transcript variant 1, mRNA.	0.773741	9.20866	6.98532	0.000163835	0.00344354	0.613826
TC1500002258.mm.2	NM_028770	Krt80	keratin 80	NM_028770	RefSeq	Mus musculus keratin 80 (Krt80), mRNA.	0.769387	9.02624	7.34534	0.000117725	0.00273572	0.979207
TC0500003495.mm.2	NM_001159908	Zfand2a	zinc finger, AN1-type domain 2A	NM_001159908	RefSeq	Mus musculus zinc finger, AN1-type domain 2A (Zfand2a), transcript variant 2, mRNA.	0.768653	10.5644	7.77149	8.08992e-05	0.00208956	1.39408
TC1600000353.mm.2	NM_001145952	Lpp	LIM domain containing preferred translocation partner in lipoma	NM_001145952	RefSeq	Mus musculus LIM domain containing preferred translocation partner in lipoma (Lpp), transcript variant 2, mRNA.	0.763622	9.5958	8.13008	5.97489e-05	0.00164323	1.72926
TC0100001500.mm.2	NM_001276455	Slc19a2	solute carrier family 19 (thiamine transporter), member 2	NM_001276455	RefSeq	Mus musculus solute carrier family 19 (thiamine transporter), member 2 (Slc19a2), transcript variant 2, mRNA.	0.763184	8.875	7.06146	0.000152608	0.00328597	0.692285
TC1500002301.mm.2	NM_026192	Calcoco1	calcium binding and coiled coil domain 1	NM_026192	RefSeq	Mus musculus calcium binding and coiled coil domain 1 (Calcoco1), mRNA.	0.761961	9.28639	7.60359	9.35973e-05	0.0023281	1.23283
TC1200001601.mm.2	NM_153198	Hbp1	high mobility group box transcription factor 1	NM_153198	RefSeq	Mus musculus high mobility group box transcription factor 1 (Hbp1), transcript variant 1, mRNA.	0.758997	10.0203	8.37362	4.89364e-05	0.001415	1.95004
TC1000001207.mm.2	NM_026268	Dusp6	dual specificity phosphatase 6	NM_026268	RefSeq	Mus musculus dual specificity phosphatase 6 (Dusp6), mRNA.	0.758931	9.84701	7.35144	0.00011708	0.00272983	0.985281
TC0900001422.mm.2	NM_029634	Ip6k2	inositol hexaphosphate kinase 2	NM_029634	RefSeq	Mus musculus inositol hexaphosphate kinase 2 (Ip6k2), mRNA.	0.75881	8.77327	7.52	0.000100741	0.00245531	1.15149
TC0600000711.mm.2	NM_011920	Abcg2	ATP-binding cassette, sub-family G (WHITE), member 2	NM_011920	RefSeq	Mus musculus ATP-binding cassette, sub-family G (WHITE), member 2 (Abcg2), mRNA.	0.758705	8.8453	6.80309	0.000194645	0.0038836	0.423408
TC1100002770.mm.2	NM_001199275	Tnip1	TNFAIP3 interacting protein 1	NM_001199275	RefSeq	Mus musculus TNFAIP3 interacting protein 1 (Tnip1), transcript variant 2, mRNA.	0.758126	8.88728	7.7424	8.29536e-05	0.00213126	1.36634
TC1100001706.mm.2	NM_138753	Hexim1	hexamethylene bis-acetamide inducible 1	NM_138753	RefSeq	Mus musculus hexamethylene bis-acetamide inducible 1 (Hexim1), mRNA.	0.756836	8.71927	6.88521	0.000180025	0.00366748	0.509683
TC0600003307.mm.2	NM_001048054	Dusp16	dual specificity phosphatase 16	NM_001048054	RefSeq	Mus musculus dual specificity phosphatase 16 (Dusp16), transcript variant B1, mRNA.	0.756656	9.22154	7.72958	8.38772e-05	0.00214814	1.3541
TC0700002628.mm.2	NM_010155	Erf	Ets2 repressor factor	NM_010155	RefSeq	Mus musculus Ets2 repressor factor (Erf), mRNA.	0.756565	9.8707	7.10823	0.00014614	0.0032008	0.740158
TC0200005023.mm.2	NM_016916	Blcap	bladder cancer associated protein homolog (human)	NM_016916	RefSeq	Mus musculus bladder cancer associated protein homolog (human) (Blcap), mRNA.	0.755156	8.41237	6.88165	0.000180632	0.00367675	0.505966
TC0600001129.mm.2	NM_022992	Arl6ip5	ADP-ribosylation factor-like 6 interacting protein 5	NM_022992	RefSeq	Mus musculus ADP-ribosylation factor-like 6 interacting protein 5 (Arl6ip5), mRNA.	0.751397	9.58057	7.64738	9.0083e-05	0.0022734	1.27515
TC0100001227.mm.2	NM_028057	Cyb5r1	cytochrome b5 reductase 1	NM_028057	RefSeq	Mus musculus cytochrome b5 reductase 1 (Cyb5r1), mRNA.	0.750597	8.33944	6.54535	0.00024987	0.00466977	0.147544
TC0900001555.mm.2	NM_001048146	Azi2	5-azacytidine induced gene 2	NM_001048146	RefSeq	Mus musculus 5-azacytidine induced gene 2 (Azi2), transcript variant 2, mRNA.	0.75006	9.40822	6.57406	0.000242927	0.0045789	0.178661
TC0400001904.mm.2	ENSMUST00000133078	Gm13145	predicted gene 13145 [Source:MGI Symbol;Acc:MGI:3701123]	ENSMUST00000133078	ENSEMBL	predicted gene 13145 [gene_biotype:protein_coding transcript_biotype:protein_coding]	0.748899	6.85706	6.81867	0.000191771	0.00383891	0.439843
TC1300001722.mm.2	NM_009238	Sox4	SRY (sex determining region Y)-box 4	NM_009238	RefSeq	Mus musculus SRY (sex determining region Y)-box 4 (Sox4), mRNA.	0.748799	8.16478	6.94024	0.000170914	0.00353544	0.567074
TC1700000269.mm.2	NM_172486	Zfp677	zinc finger protein 677	NM_172486	RefSeq	Mus musculus zinc finger protein 677 (Zfp677), mRNA.	0.74462	7.73698	6.99891	0.000161765	0.00341032	0.627877
TC1400000941.mm.2	NM_145944	Ccdc25	coiled-coil domain containing 25	NM_145944	RefSeq	Mus musculus coiled-coil domain containing 25 (Ccdc25), mRNA.	0.744359	8.2839	7.67556	8.78996e-05	0.00222992	1.30229
TC0100000268.mm.2	NM_027098	Mrpl30	mitochondrial ribosomal protein L30	NM_027098	RefSeq	Mus musculus mitochondrial ribosomal protein L30 (Mrpl30), mRNA.	0.742827	10.2727	6.84517	0.000186995	0.00377137	0.467713
TC1100001097.mm.2	NM_183263	Rnmtl1	RNA methyltransferase like 1	NM_183263	RefSeq	Mus musculus RNA methyltransferase like 1 (Rnmtl1), mRNA.	0.741125	7.99592	7.31656	0.00012082	0.00278749	0.950513
TC0100003797.mm.2	NM_001081259	Mfsd7b	major facilitator superfamily domain containing 7B	NM_001081259	RefSeq	Mus musculus major facilitator superfamily domain containing 7B (Mfsd7b), transcript variant 1, mRNA.	0.741096	8.42428	7.33161	0.00011919	0.00276305	0.965531
TC0700001519.mm.2	NM_001013616	Trim6	tripartite motif-containing 6	NM_001013616	RefSeq	Mus musculus tripartite motif-containing 6 (Trim6), mRNA.	0.739707	5.30527	6.56173	0.000245883	0.00462308	0.165305
TC1800001345.mm.2	NM_175751	Zfp608	zinc finger protein 608	NM_175751	RefSeq	Mus musculus zinc finger protein 608 (Zfp608), mRNA.	0.739129	8.55444	7.39385	0.000112707	0.00265085	1.02737
TC1100000798.mm.2	NM_001039536	Pigl	phosphatidylinositol glycan anchor biosynthesis, class L	NM_001039536	RefSeq	Mus musculus phosphatidylinositol glycan anchor biosynthesis, class L (Pigl), mRNA.	0.738188	8.92886	7.79373	7.9367e-05	0.00206099	1.41523
TC0800000979.mm.2	NM_026791	Fbxw9	F-box and WD-40 domain protein 9	NM_026791	RefSeq	Mus musculus F-box and WD-40 domain protein 9 (Fbxw9), mRNA.	0.737471	7.34591	6.50367	0.000260346	0.00483198	0.102196
TC1400001002.mm.2	NM_153136	Nudt18	nudix (nucleoside diphosphate linked moiety X)-type motif 18	NM_153136	RefSeq	Mus musculus nudix (nucleoside diphosphate linked moiety X)-type motif 18 (Nudt18), mRNA.	0.736366	7.70685	6.52812	0.000254144	0.00473502	0.128818
TC0200001535.mm.2	NM_178890	Abtb2	ankyrin repeat and BTB (POZ) domain containing 2	NM_178890	RefSeq	Mus musculus ankyrin repeat and BTB (POZ) domain containing 2 (Abtb2), mRNA.	0.736078	7.68828	6.67764	0.000219607	0.00422491	0.290114
TC0700002053.mm.2	NM_001163689	Pnpla2	patatin-like phospholipase domain containing 2	NM_001163689	RefSeq	Mus musculus patatin-like phospholipase domain containing 2 (Pnpla2), transcript variant 1, mRNA.	0.734773	9.90434	6.83	0.000189713	0.00381032	0.451766
TC1600000184.mm.2	NM_011415	Snai2	snail family zinc finger 2	NM_011415	RefSeq	Mus musculus snail family zinc finger 2 (Snai2), mRNA.	0.733603	9.1513	6.68193	0.000218697	0.0042141	0.294701
TC1100000722.mm.2	NM_001205068	Jmjd4	jumonji domain containing 4	NM_001205068	RefSeq	Mus musculus jumonji domain containing 4 (Jmjd4), transcript variant 2, mRNA.	0.731284	8.42292	7.63001	9.14589e-05	0.00229648	1.25839
TC0500003590.mm.2	NM_133735	Ptcd1	pentatricopeptide repeat domain 1	NM_133735	RefSeq	Mus musculus pentatricopeptide repeat domain 1 (Ptcd1), mRNA.	0.729212	6.27479	7.627	9.16999e-05	0.00229981	1.25548
TC1700000662.mm.2	NM_033444	Clic1	chloride intracellular channel 1	NM_033444	RefSeq	Mus musculus chloride intracellular channel 1 (Clic1), mRNA.	0.727488	9.60602	6.80959	0.00019344	0.00386593	0.43027
TC1800000457.mm.2	NM_027490	Dcp2	DCP2 decapping enzyme homolog (S. cerevisiae)	NM_027490	RefSeq	Mus musculus DCP2 decapping enzyme homolog (S. cerevisiae) (Dcp2), mRNA.	0.72217	9.21772	6.89404	0.000178527	0.00364924	0.518919
TC0800003235.mm.2	NM_001168621	Znrf1	zinc and ring finger 1	NM_001168621	RefSeq	Mus musculus zinc and ring finger 1 (Znrf1), transcript variant 2, mRNA.	0.721252	10.0964	6.41228	0.000285077	0.00517473	0.00202269
TC0800000592.mm.2	NM_001253754	Gpm6a	glycoprotein m6a	NM_001253754	RefSeq	Mus musculus glycoprotein m6a (Gpm6a), transcript variant 2, mRNA.	0.720017	5.11387	7.07999	0.000150008	0.00325314	0.711278
TC0X00002826.mm.2	NM_001001176	Taf9b	TAF9B RNA polymerase II, TATA box binding protein (TBP)-associated factor	NM_001001176	RefSeq	Mus musculus TAF9B RNA polymerase II, TATA box binding protein (TBP)-associated factor (Taf9b), transcript variant 2, mRNA.	0.711993	9.60693	7.18829	0.000135766	0.00303617	0.821554
TC1600001093.mm.2	ENSMUST00000113729	B230307C23Rik	RIKEN cDNA B230307C23 gene [Source:MGI Symbol;Acc:MGI:3643396]	ENSMUST00000113729	ENSEMBL	RIKEN cDNA B230307C23 gene [gene_biotype:protein_coding transcript_biotype:protein_coding]	0.711701	8.57194	7.41435	0.000110658	0.00261538	1.04766
TC0800001038.mm.2	NM_001128170	Cyld	cylindromatosis (turban tumor syndrome)	NM_001128170	RefSeq	Mus musculus cylindromatosis (turban tumor syndrome) (Cyld), transcript variant 3, mRNA.	0.703306	8.22196	7.37035	0.000115107	0.00269682	1.00407
TC1900001118.mm.2	NM_023731	Ccdc86	coiled-coil domain containing 86	NM_023731	RefSeq	Mus musculus coiled-coil domain containing 86 (Ccdc86), mRNA.	0.701254	8.1343	7.16918	0.000138166	0.00306499	0.802184
TC0100003127.mm.2	NM_175259	Shisa4	shisa family member 4	NM_175259	RefSeq	Mus musculus shisa family member 4 (Shisa4), mRNA.	0.699364	8.44698	7.07091	0.000151276	0.00327183	0.701979
TC1000000784.mm.2	NM_007793	Cstb	cystatin B	NM_007793	RefSeq	Mus musculus cystatin B (Cstb), mRNA.	0.697916	9.97502	6.53189	0.0002532	0.00472106	0.132927
TC1100003152.mm.2	NM_001024926	Cyb5d2	cytochrome b5 domain containing 2	NM_001024926	RefSeq	Mus musculus cytochrome b5 domain containing 2 (Cyb5d2), mRNA.	0.697693	7.46398	6.41175	0.000285228	0.00517473	0.00143928
TC0900003024.mm.2	NM_178907	Mapkapk3	mitogen-activated protein kinase-activated protein kinase 3	NM_178907	RefSeq	Mus musculus mitogen-activated protein kinase-activated protein kinase 3 (Mapkapk3), transcript variant 1, mRNA.	0.695791	8.14222	6.89118	0.00017901	0.00365604	0.515931
TC1700000948.mm.2	NM_020042	Mocs1	molybdenum cofactor synthesis 1	NM_020042	RefSeq	Mus musculus molybdenum cofactor synthesis 1 (Mocs1), transcript variant 1, mRNA.	0.694513	9.2603	6.92459	0.000173452	0.00357572	0.550784
TC0400000377.mm.2	NM_175138	Dnaic1	dynein, axonemal, intermediate chain 1	NM_175138	RefSeq	Mus musculus dynein, axonemal, intermediate chain 1 (Dnaic1), mRNA.	0.693784	11.16	7.55977	9.72688e-05	0.00238511	1.19028
TC0100002468.mm.2	NM_025964	Mettl21a	methyltransferase like 21A	NM_025964	RefSeq	Mus musculus methyltransferase like 21A (Mettl21a), mRNA.	0.690133	9.38674	6.97637	0.000165214	0.00345592	0.604564
TC1400000609.mm.2	NM_023434	Tox4	TOX high mobility group box family member 4	NM_023434	RefSeq	Mus musculus TOX high mobility group box family member 4 (Tox4), mRNA.	0.688761	10.386	7.25266	0.000128022	0.00290532	0.886492
TC1100002664.mm.2	NM_011018	Sqstm1	sequestosome 1	NM_011018	RefSeq	Mus musculus sequestosome 1 (Sqstm1), transcript variant 1, mRNA.	0.688483	11.5973	7.40706	0.000111382	0.00262992	1.04045
TC0200004896.mm.2	NM_175093	Trib3	tribbles homolog 3 (Drosophila)	NM_175093	RefSeq	Mus musculus tribbles homolog 3 (Drosophila) (Trib3), mRNA.	0.688249	9.11131	7.18381	0.000136325	0.00304159	0.817013
TC1100003318.mm.2	NM_001042565	Wsb1	WD repeat and SOCS box-containing 1	NM_001042565	RefSeq	Mus musculus WD repeat and SOCS box-containing 1 (Wsb1), transcript variant 2, mRNA.	0.686973	9.6197	6.65364	0.000224779	0.00429369	0.264405
TC1000003163.mm.2	NM_178066	Tmem198b	transmembrane protein 198b	NM_178066	RefSeq	Mus musculus transmembrane protein 198b (Tmem198b), mRNA.	0.686889	7.59732	7.04004	0.000155677	0.00332214	0.670276
TC0700001557.mm.2	NM_001161724	Ilk	integrin linked kinase	NM_001161724	RefSeq	Mus musculus integrin linked kinase (Ilk), transcript variant 1, mRNA.	0.686833	11.092	6.97408	0.000165569	0.00346036	0.602191
TC1300002326.mm.2	NM_009817	Cast	calpastatin	NM_009817	RefSeq	Mus musculus calpastatin (Cast), transcript variant 2, mRNA.	0.686734	9.97681	6.90326	0.000176978	0.00362371	0.528546
TC1600001143.mm.2	NM_145359	Ubald1	UBA-like domain containing 1	NM_145359	RefSeq	Mus musculus UBA-like domain containing 1 (Ubald1), mRNA.	0.685602	8.35396	7.39559	0.00011253	0.00264928	1.0291
TC1000002870.mm.2	NM_172554	Zdhhc17	zinc finger, DHHC domain containing 17	NM_172554	RefSeq	Mus musculus zinc finger, DHHC domain containing 17 (Zdhhc17), mRNA.	0.684028	8.23491	6.51468	0.000257531	0.00479075	0.1142
TC1300000522.mm.2	NM_153789	Mylip	myosin regulatory light chain interacting protein	NM_153789	RefSeq	Mus musculus myosin regulatory light chain interacting protein (Mylip), mRNA.	0.679274	8.80872	7.12275	0.000144195	0.00316105	0.754973
TC0400001523.mm.2	NM_133889	Bsdc1	BSD domain containing 1	NM_133889	RefSeq	Mus musculus BSD domain containing 1 (Bsdc1), mRNA.	0.678023	8.79258	6.58084	0.000241318	0.00455213	0.185996
TC1900000888.mm.2	NM_001136091	Tcirg1	T cell, immune regulator 1, ATPase, H+ transporting, lysosomal V0 protein A3	NM_001136091	RefSeq	Mus musculus T cell, immune regulator 1, ATPase, H+ transporting, lysosomal V0 protein A3 (Tcirg1), transcript variant 2, mRNA.	0.677905	9.92171	7.1501	0.000140609	0.0031122	0.782806
TC1700001145.mm.2	NM_027166	Ypel5	yippee-like 5 (Drosophila)	NM_027166	RefSeq	Mus musculus yippee-like 5 (Drosophila) (Ypel5), mRNA.	0.6776	9.34431	6.73761	0.000207254	0.00404513	0.354065
TC1000003130.mm.2	NM_001039080	Rbms2	RNA binding motif, single stranded interacting protein 2	NM_001039080	RefSeq	Mus musculus RNA binding motif, single stranded interacting protein 2 (Rbms2), transcript variant 2, mRNA.	0.676867	10.0944	7.20745	0.000133408	0.003001	0.84093
TC0800002008.mm.2	NM_178648	Ubxn8	UBX domain protein 8	NM_178648	RefSeq	Mus musculus UBX domain protein 8 (Ubxn8), mRNA.	0.67355	8.82135	6.68958	0.000217084	0.00419861	0.30288
TC1200000287.mm.2	NM_001033436	Atxn7l1	ataxin 7-like 1	NM_001033436	RefSeq	Mus musculus ataxin 7-like 1 (Atxn7l1), transcript variant 1, mRNA.	0.663357	8.3429	6.65943	0.00022352	0.00427977	0.270608
TC1100004100.mm.2	NM_008211	H3f3b	H3 histone, family 3B	NM_008211	RefSeq	Mus musculus H3 histone, family 3B (H3f3b), mRNA.	0.651732	11.1226	7.06308	0.00015238	0.00328597	0.693942
TC0300000017.mm.2	NM_030708	Zfhx4	zinc finger homeodomain 4	NM_030708	RefSeq	Mus musculus zinc finger homeodomain 4 (Zfhx4), mRNA.	0.64565	7.13817	6.71859	0.000211086	0.00411661	0.333826
TC0900000550.mm.2	NM_027498	Sik3	SIK family kinase 3	NM_027498	RefSeq	Mus musculus SIK family kinase 3 (Sik3), mRNA.	0.638864	9.98925	6.64271	0.000227181	0.00432983	0.252665
TC1300000482.mm.2	NM_001005740	Phactr1	phosphatase and actin regulator 1	NM_001005740	RefSeq	Mus musculus phosphatase and actin regulator 1 (Phactr1), transcript variant 2, mRNA.	0.634536	8.55737	6.46468	0.000270592	0.00495375	0.0595855
TC0X00000216.mm.2	NM_001159645	Araf	v-raf murine sarcoma 3611 viral oncogene homolog	NM_001159645	RefSeq	Mus musculus v-raf murine sarcoma 3611 viral oncogene homolog (Araf), transcript variant 2, mRNA.	0.630149	9.65843	6.63866	0.000228077	0.00434298	0.248316
TC0200003512.mm.2	NM_028810	Rnd3	Rho family GTPase 3	NM_028810	RefSeq	Mus musculus Rho family GTPase 3 (Rnd3), mRNA.	0.626136	7.88722	6.75846	0.000203144	0.00402003	0.376193
TC0700000223.mm.2	NM_001277988	Meis3	Meis homeobox 3	NM_001277988	RefSeq	Mus musculus Meis homeobox 3 (Meis3), transcript variant 2, mRNA.	0.625369	7.97351	6.67365	0.000220459	0.00423456	0.28584
TC0200002295.mm.2	NM_001159551	H13	histocompatibility 13	NM_001159551	RefSeq	Mus musculus histocompatibility 13 (H13), transcript variant 1, mRNA.	0.607993	10.6818	6.45535	0.000273109	0.00499048	0.0493647
TC1600000454.mm.2	NM_001081255	Lrch3	leucine-rich repeats and calponin homology (CH) domain containing 3	NM_001081255	RefSeq	Mus musculus leucine-rich repeats and calponin homology (CH) domain containing 3 (Lrch3), transcript variant 1, mRNA.	0.593805	10.4932	6.42316	0.000282	0.00512769	0.0140029
TC1100000426.mm.2	NM_148673	Slu7	SLU7 splicing factor homolog (S. cerevisiae)	NM_148673	RefSeq	Mus musculus SLU7 splicing factor homolog (S. cerevisiae) (Slu7), transcript variant 1, mRNA.	0.593399	10.1865	6.43261	0.000279357	0.00508728	0.0243958
TC0200002577.mm.2	NM_023565	Cse1l	chromosome segregation 1-like (S. cerevisiae)	NM_023565	RefSeq	Mus musculus chromosome segregation 1-like (S. cerevisiae) (Cse1l), mRNA.	-0.604238	10.1691	-6.60395	0.000235925	0.00446431	0.210957
TC0700001580.mm.2	NM_172907	Olfml1	olfactomedin-like 1	NM_172907	RefSeq	Mus musculus olfactomedin-like 1 (Olfml1), mRNA.	-0.623341	5.44529	-6.53952	0.000251308	0.0046894	0.141209
TC0800002558.mm.2	NM_001163029	Adgre5	adhesion G protein-coupled receptor E5	NM_001163029	RefSeq	Mus musculus adhesion G protein-coupled receptor E5 (Adgre5), transcript variant 2, mRNA.	-0.62799	8.69965	-6.55003	0.000248723	0.00465553	0.152622
TC1100000582.mm.2	NM_029976	Cdkn2aipnl	CDKN2A interacting protein N-terminal like	NM_029976	RefSeq	Mus musculus CDKN2A interacting protein N-terminal like (Cdkn2aipnl), mRNA.	-0.633578	11.1422	-6.88722	0.000179683	0.00366359	0.511788
TC0900001042.mm.2	NM_134255	Elovl5	ELOVL family member 5, elongation of long chain fatty acids (yeast)	NM_134255	RefSeq	Mus musculus ELOVL family member 5, elongation of long chain fatty acids (yeast) (Elovl5), mRNA.	-0.633592	10.4767	-6.98102	0.000164496	0.00345284	0.609377
TC0900001921.mm.2	NM_172920	Dpy19l1	dpy-19-like 1 (C. elegans)	NM_172920	RefSeq	Mus musculus dpy-19-like 1 (C. elegans) (Dpy19l1), mRNA.	-0.637024	7.00419	-6.45244	0.0002739	0.00499542	0.0461722
TC0700000979.mm.2	NM_028626	Mcee	methylmalonyl CoA epimerase	NM_028626	RefSeq	Mus musculus methylmalonyl CoA epimerase (Mcee), mRNA.	-0.637196	8.0312	-6.86966	0.000182695	0.00370628	0.493413
TC0600000655.mm.2	NM_001001335	Plekha8	pleckstrin homology domain containing, family A (phosphoinositide binding specific) member 8	NM_001001335	RefSeq	Mus musculus pleckstrin homology domain containing, family A (phosphoinositide binding specific) member 8 (Plekha8), transcript variant 2, mRNA.	-0.641096	8.99606	-6.68903	0.000217199	0.00419861	0.302291
TC0500003648.mm.2	NM_010439	Hmgb1	high mobility group box 1	NM_010439	RefSeq	Mus musculus high mobility group box 1 (Hmgb1), transcript variant 2, mRNA.	-0.644134	11.9111	-6.48326	0.000265654	0.00488925	0.0799159
TC1400002430.mm.2	NM_026232	Slc25a30	solute carrier family 25, member 30	NM_026232	RefSeq	Mus musculus solute carrier family 25, member 30 (Slc25a30), mRNA.	-0.645086	7.23326	-6.49213	0.000263333	0.00485819	0.0896043
TC0600003205.mm.2	NM_010219	Fkbp4	FK506 binding protein 4	NM_010219	RefSeq	Mus musculus FK506 binding protein 4 (Fkbp4), mRNA.	-0.652075	10.4993	-6.75084	0.000204634	0.00403303	0.368119
TC0500001462.mm.2	NM_029752	Bri3bp	Bri3 binding protein	NM_029752	RefSeq	Mus musculus Bri3 binding protein (Bri3bp), mRNA.	-0.653847	8.74213	-6.86677	0.000183197	0.00370783	0.490382
TC1900000882.mm.2	NM_008513	Lrp5	low density lipoprotein receptor-related protein 5	NM_008513	RefSeq	Mus musculus low density lipoprotein receptor-related protein 5 (Lrp5), mRNA.	-0.655165	7.91902	-6.47315	0.00026833	0.00492532	0.0688531
TC1000002453.mm.2	NM_172134	Pdxk	pyridoxal (pyridoxine, vitamin B6) kinase	NM_172134	RefSeq	Mus musculus pyridoxal (pyridoxine, vitamin B6) kinase (Pdxk), mRNA.	-0.656581	9.52852	-6.50415	0.000260222	0.00483198	0.102723
TC1100000907.mm.2	NM_001024206	Trappc1	trafficking protein particle complex 1	NM_001024206	RefSeq	Mus musculus trafficking protein particle complex 1 (Trappc1), mRNA.	-0.65892	9.7659	-6.61943	0.000232389	0.00441119	0.227635
TC0500000602.mm.2	NM_026667	Fam114a1	family with sequence similarity 114, member A1	NM_026667	RefSeq	Mus musculus family with sequence similarity 114, member A1 (Fam114a1), mRNA.	-0.666906	8.08379	-6.76033	0.000202779	0.00401608	0.378182
TC0700002788.mm.2	NM_019503	Fxyd1	FXYD domain-containing ion transport regulator 1	NM_019503	RefSeq	Mus musculus FXYD domain-containing ion transport regulator 1 (Fxyd1), transcript variant 1, mRNA.	-0.667516	6.19275	-6.71641	0.00021153	0.00411803	0.331507
TC0500000303.mm.2	NM_001048192	Agbl5	ATP/GTP binding protein-like 5	NM_001048192	RefSeq	Mus musculus ATP/GTP binding protein-like 5 (Agbl5), transcript variant 3, mRNA.	-0.672294	6.93832	-6.42119	0.000282552	0.00513388	0.0118415
TC1900001037.mm.2	NM_027643	Naa40	N(alpha)-acetyltransferase 40, NatD catalytic subunit, homolog (S. cerevisiae)	NM_027643	RefSeq	Mus musculus N(alpha)-acetyltransferase 40, NatD catalytic subunit, homolog (S. cerevisiae) (Naa40), mRNA.	-0.673713	8.9392	-6.96933	0.000166307	0.00347279	0.597273
TC0700003770.mm.2	NM_001256081	Myo7a	myosin VIIA	NM_001256081	RefSeq	Mus musculus myosin VIIA (Myo7a), transcript variant 1, mRNA.	-0.673941	11.5175	-7.00854	0.000160316	0.00338861	0.637826
TC0600002697.mm.2	NM_008881	Plxna1	plexin A1	NM_008881	RefSeq	Mus musculus plexin A1 (Plxna1), mRNA.	-0.67466	10.2943	-6.82895	0.000189903	0.00381096	0.450662
TC1200002224.mm.2	NM_001033213	Ttc7b	tetratricopeptide repeat domain 7B	NM_001033213	RefSeq	Mus musculus tetratricopeptide repeat domain 7B (Ttc7b), mRNA.	-0.677699	8.45269	-7.29773	0.000122893	0.00282217	0.931694
TC0200003689.mm.2	NM_016866	Stk39	serine/threonine kinase 39	NM_016866	RefSeq	Mus musculus serine/threonine kinase 39 (Stk39), mRNA.	-0.678289	9.68979	-7.27391	0.000125575	0.00286277	0.907827
TC1700001457.mm.2	NM_026310	Mrpl18	mitochondrial ribosomal protein L18	NM_026310	RefSeq	Mus musculus mitochondrial ribosomal protein L18 (Mrpl18), mRNA.	-0.678329	9.11906	-6.75171	0.000204463	0.00403303	0.369041
TC0300001149.mm.2	NM_025444	Taf13	TAF13 RNA polymerase II, TATA box binding protein (TBP)-associated factor	NM_025444	RefSeq	Mus musculus TAF13 RNA polymerase II, TATA box binding protein (TBP)-associated factor (Taf13), mRNA.	-0.6801	7.48164	-6.47189	0.000268664	0.00492591	0.067479
TC0500002461.mm.2	NM_145923	Rell1	RELT-like 1	NM_145923	RefSeq	Mus musculus RELT-like 1 (Rell1), mRNA.	-0.682753	9.25332	-6.4891	0.000264124	0.0048685	0.0862913
TC0200005516.mm.2	NM_145538	Tmem189	transmembrane protein 189	NM_145538	RefSeq	Mus musculus transmembrane protein 189 (Tmem189), mRNA.	-0.683538	10.1932	-7.20632	0.000133546	0.003001	0.839787
TC0400003746.mm.2	NM_145554	Ldlrap1	low density lipoprotein receptor adaptor protein 1	NM_145554	RefSeq	Mus musculus low density lipoprotein receptor adaptor protein 1 (Ldlrap1), mRNA.	-0.685184	7.82481	-7.35401	0.000116809	0.00272614	0.98784
TC0100002288.mm.2	NM_172653	Slc39a10	solute carrier family 39 (zinc transporter), member 10	NM_172653	RefSeq	Mus musculus solute carrier family 39 (zinc transporter), member 10 (Slc39a10), mRNA.	-0.688471	9.9356	-7.25127	0.000128184	0.00290532	0.885091
TC0300001137.mm.2	NM_001271599	Sort1	sortilin 1	NM_001271599	RefSeq	Mus musculus sortilin 1 (Sort1), transcript variant 1, mRNA.	-0.695587	10.3095	-6.98612	0.000163713	0.00344354	0.614651
TC1400000859.mm.2	XR_105614.1	Gm17778	PREDICTED: predicted gene, 17778 (Gm17778), miscRNA.	XR_105614.1	MGI/Jackson Lab	PREDICTED: predicted gene, 17778 (Gm17778), miscRNA.	-0.695615	6.05666	-6.91241	0.000175455	0.00360167	0.538096
TC0900002377.mm.2	NM_007783	Csk	c-src tyrosine kinase	NM_007783	RefSeq	Mus musculus c-src tyrosine kinase (Csk), transcript variant 1, mRNA.	-0.695731	9.22763	-7.14955	0.00014068	0.0031122	0.782248
TC1700001084.mm.2	NM_001003919	Ddx11	DEAD/H (Asp-Glu-Ala-Asp/His) box helicase 11	NM_001003919	RefSeq	Mus musculus DEAD/H (Asp-Glu-Ala-Asp/His) box helicase 11 (Ddx11), mRNA.	-0.698359	7.18196	-6.98483	0.000163911	0.00344354	0.613316
TC0500001702.mm.2	NM_177879	Sdk1	sidekick homolog 1 (chicken)	NM_177879	RefSeq	Mus musculus sidekick homolog 1 (chicken) (Sdk1), mRNA.	-0.698607	6.52433	-6.70751	0.000213356	0.00414417	0.322014
TC1100002036.mm.2	NM_001038230	Anapc11	anaphase promoting complex subunit 11	NM_001038230	RefSeq	Mus musculus anaphase promoting complex subunit 11 (Anapc11), transcript variant 1, mRNA.	-0.700383	9.65818	-7.38467	0.000113637	0.00267013	1.01828
TC0100002025.mm.2	ENSMUST00000073196	Gm2710	predicted gene 2710 [Source:MGI Symbol;Acc:MGI:3780879]	ENSMUST00000073196	ENSEMBL	predicted gene 2710 [gene_biotype:processed_pseudogene transcript_biotype:processed_pseudogene]	-0.70248	11.0087	-6.59157	0.000238797	0.00451161	0.197592
TC0900002737.mm.2	NM_009945	Cox7a2	cytochrome c oxidase subunit VIIa 2	NM_009945	RefSeq	Mus musculus cytochrome c oxidase subunit VIIa 2 (Cox7a2), mRNA.	-0.703816	9.95378	-7.09615	0.000147782	0.00322217	0.727811
TC0600000591.mm.2	NM_001164733	Mpp6	membrane protein, palmitoylated 6 (MAGUK p55 subfamily member 6)	NM_001164733	RefSeq	Mus musculus membrane protein, palmitoylated 6 (MAGUK p55 subfamily member 6) (Mpp6), transcript variant 2, mRNA.	-0.707925	10.1854	-6.60536	0.000235601	0.00446166	0.212476
TC1200001262.mm.2	NM_007421	Adssl1	adenylosuccinate synthetase like 1	NM_007421	RefSeq	Mus musculus adenylosuccinate synthetase like 1 (Adssl1), mRNA.	-0.708465	5.42234	-7.13972	0.000141958	0.00312617	0.772255
TC1500001872.mm.2	NM_001289898	Csnk1e	casein kinase 1, epsilon	NM_001289898	RefSeq	Mus musculus casein kinase 1, epsilon (Csnk1e), transcript variant 2, mRNA.	-0.714215	10.4713	-6.94371	0.000170358	0.00352987	0.570677
TC1100000753.mm.2	NM_025757	Gid4	GID complex subunit 4, VID24 homolog (S. cerevisiae)	NM_025757	RefSeq	Mus musculus GID complex subunit 4, VID24 homolog (S. cerevisiae) (Gid4), mRNA.	-0.715751	9.89992	-7.34057	0.000118231	0.00274346	0.974459
TC1300001557.mm.2	NM_178211	Hist1h4k	histone cluster 1, H4k	NM_178211	RefSeq	Mus musculus histone cluster 1, H4k (Hist1h4k), mRNA.	-0.718437	10.7187	-7.27144	0.000125857	0.00286277	0.90535
TC0X00000668.mm.2	NM_010941	Nsdhl	NAD(P) dependent steroid dehydrogenase-like	NM_010941	RefSeq	Mus musculus NAD(P) dependent steroid dehydrogenase-like (Nsdhl), mRNA.	-0.71992	10.5495	-7.09391	0.000148087	0.00322593	0.725526
TC0X00000933.mm.2	NM_199018	Stard8	START domain containing 8	NM_199018	RefSeq	Mus musculus START domain containing 8 (Stard8), mRNA.	-0.724532	7.9166	-7.3274	0.000119643	0.00276825	0.961337
TC1100000713.mm.2	NM_031172	Trim17	tripartite motif-containing 17	NM_031172	RefSeq	Mus musculus tripartite motif-containing 17 (Trim17), mRNA.	-0.724732	9.33393	-6.74973	0.000204854	0.00403407	0.366934
TC0200003872.mm.2	NM_001033166	2700094K13Rik	RIKEN cDNA 2700094K13 gene	NM_001033166	RefSeq	Mus musculus RIKEN cDNA 2700094K13 gene (2700094K13Rik), transcript variant 1, mRNA.	-0.725334	7.73649	-6.49554	0.000262448	0.00484868	0.0933201
TC1200000069.mm.2	NM_011519	Sdc1	syndecan 1	NM_011519	RefSeq	Mus musculus syndecan 1 (Sdc1), mRNA.	-0.725972	8.31885	-7.46514	0.00010576	0.00254434	1.09772
TC1100003491.mm.2	NM_001168471	Dynll2	dynein light chain LC8-type 2	NM_001168471	RefSeq	Mus musculus dynein light chain LC8-type 2 (Dynll2), transcript variant 3, mRNA.	-0.726619	6.93089	-6.64904	0.000225787	0.00430954	0.259463
TC0500001798.mm.2	NM_025652	Gtf3a	general transcription factor III A	NM_025652	RefSeq	Mus musculus general transcription factor III A (Gtf3a), mRNA.	-0.7276	9.76671	-6.90857	0.000176094	0.00361171	0.534083
TC1000000502.mm.2	NM_008297	Hsf2	heat shock factor 2	NM_008297	RefSeq	Mus musculus heat shock factor 2 (Hsf2), mRNA.	-0.728532	8.5662	-6.70284	0.00021432	0.0041529	0.317033
TC1100002329.mm.2	NM_008618	Mdh1	malate dehydrogenase 1, NAD (soluble)	NM_008618	RefSeq	Mus musculus malate dehydrogenase 1, NAD (soluble) (Mdh1), transcript variant 1, mRNA.	-0.72871	10.6187	-7.37591	0.000114534	0.002686	1.00959
TC0100000420.mm.2	NM_028546	1700066M21Rik	RIKEN cDNA 1700066M21 gene	NM_028546	RefSeq	Mus musculus RIKEN cDNA 1700066M21 gene (1700066M21Rik), mRNA.	-0.73064	6.73391	-6.79399	0.000196344	0.00390783	0.413806
TC0700001736.mm.2	NM_001267710	Eef2k	eukaryotic elongation factor-2 kinase	NM_001267710	RefSeq	Mus musculus eukaryotic elongation factor-2 kinase (Eef2k), transcript variant 2, mRNA.	-0.732422	9.14897	-7.60937	9.31246e-05	0.00231873	1.23843
TC1000001198.mm.2	NM_026482	Atp2b1	ATPase, Ca++ transporting, plasma membrane 1	NM_026482	RefSeq	Mus musculus ATPase, Ca++ transporting, plasma membrane 1 (Atp2b1), mRNA.	-0.733955	7.96739	-7.34798	0.000117445	0.00273532	0.981837
TC1400001152.mm.2	NM_175265	Bora	bora, aurora kinase A activator	NM_175265	RefSeq	Mus musculus bora, aurora kinase A activator (Bora), mRNA.	-0.735121	7.67157	-6.54907	0.000248958	0.00465633	0.15158
TC0800003069.mm.2	NM_138656	Mvd	mevalonate (diphospho) decarboxylase	NM_138656	RefSeq	Mus musculus mevalonate (diphospho) decarboxylase (Mvd), transcript variant 1, mRNA.	-0.736043	7.93794	-7.62308	9.20146e-05	0.00230214	1.25169
TC0600001813.mm.2	NM_001177572	Slc25a13	solute carrier family 25 (mitochondrial carrier, adenine nucleotide translocator), member 13	NM_001177572	RefSeq	Mus musculus solute carrier family 25 (mitochondrial carrier, adenine nucleotide translocator), member 13 (Slc25a13), transcript variant 2, mRNA.	-0.736553	9.05859	-7.09074	0.000148523	0.0032296	0.722281
TC1100000537.mm.2	NM_026543	3010026O09Rik	RIKEN cDNA 3010026O09 gene	NM_026543	RefSeq	Mus musculus RIKEN cDNA 3010026O09 gene (3010026O09Rik), mRNA.	-0.737613	8.40952	-8.10127	6.11967e-05	0.00167733	1.70278
TC0100002413.mm.2	NM_001045513	Raph1	Ras association (RalGDS/AF-6) and pleckstrin homology domains 1	NM_001045513	RefSeq	Mus musculus Ras association (RalGDS/AF-6) and pleckstrin homology domains 1 (Raph1), mRNA.	-0.737934	8.83041	-6.67249	0.000220706	0.00423594	0.284602
TC0600003185.mm.2	NM_175414	Tspan9	tetraspanin 9	NM_175414	RefSeq	Mus musculus tetraspanin 9 (Tspan9), mRNA.	-0.738012	9.13268	-7.61371	9.27716e-05	0.00231231	1.24263
TC0600000964.mm.2	NM_145223	Alms1	Alstrom syndrome 1	NM_145223	RefSeq	Mus musculus Alstrom syndrome 1 (Alms1), mRNA.	-0.738068	8.22026	-6.73887	0.000207004	0.00404513	0.355399
TC0400002523.mm.2	NM_001110320	Cd72	CD72 antigen	NM_001110320	RefSeq	Mus musculus CD72 antigen (Cd72), transcript variant 1, mRNA.	-0.738341	8.26152	-8.02225	6.53734e-05	0.00175796	1.62976
TC0200002453.mm.2	NM_021280	Plcg1	phospholipase C, gamma 1	NM_021280	RefSeq	Mus musculus phospholipase C, gamma 1 (Plcg1), mRNA.	-0.738416	8.83024	-7.10005	0.000147249	0.00321925	0.731805
TC1000000465.mm.2	NM_025705	Dcbld1	discoidin, CUB and LCCL domain containing 1	NM_025705	RefSeq	Mus musculus discoidin, CUB and LCCL domain containing 1 (Dcbld1), mRNA.	-0.739245	9.22586	-7.50379	0.000102195	0.0024758	1.13564
TC1500000736.mm.2	NM_010247	Xrcc6	X-ray repair complementing defective repair in Chinese hamster cells 6	NM_010247	RefSeq	Mus musculus X-ray repair complementing defective repair in Chinese hamster cells 6 (Xrcc6), mRNA.	-0.741172	8.99127	-6.55676	0.000247083	0.00463559	0.159927
TC0500001302.mm.2	NM_145564	Fbxo21	F-box protein 21	NM_145564	RefSeq	Mus musculus F-box protein 21 (Fbxo21), mRNA.	-0.742369	7.87009	-6.91912	0.000174349	0.0035836	0.545088
TC0600003474.mm.2	NM_019643	Fam60a	family with sequence similarity 60, member A	NM_019643	RefSeq	Mus musculus family with sequence similarity 60, member A (Fam60a), mRNA.	-0.742448	10.1457	-6.62078	0.000232082	0.00440883	0.229093
TC0500003504.mm.2	NM_010752	Mad1l1	MAD1 mitotic arrest deficient 1-like 1	NM_010752	RefSeq	Mus musculus MAD1 mitotic arrest deficient 1-like 1 (Mad1l1), mRNA.	-0.744372	7.84967	-7.24225	0.00012924	0.00292052	0.876018
TC1500001996.mm.2	NM_001033273	5031439G07Rik	RIKEN cDNA 5031439G07 gene	NM_001033273	RefSeq	Mus musculus RIKEN cDNA 5031439G07 gene (5031439G07Rik), mRNA.	-0.744401	11.0769	-7.88894	7.3165e-05	0.00192861	1.50522
TC1200002213.mm.2	NM_030172	Efcab11	EF-hand calcium binding domain 11	NM_030172	RefSeq	Mus musculus EF-hand calcium binding domain 11 (Efcab11), mRNA.	-0.74464	7.37581	-6.50512	0.000259973	0.00483198	0.103781
TC0300002549.mm.2	NM_016966	Phgdh	3-phosphoglycerate dehydrogenase	NM_016966	RefSeq	Mus musculus 3-phosphoglycerate dehydrogenase (Phgdh), mRNA.	-0.744757	9.72087	-6.68069	0.00021896	0.0042158	0.293377
TC0900002158.mm.2	NM_001110251	Hmbs	hydroxymethylbilane synthase	NM_001110251	RefSeq	Mus musculus hydroxymethylbilane synthase (Hmbs), transcript variant 2, mRNA.	-0.749197	7.59688	-7.66149	8.8982e-05	0.00225165	1.28875
TC0500003169.mm.2	NM_145853	Tpcn1	two pore channel 1	NM_145853	RefSeq	Mus musculus two pore channel 1 (Tpcn1), mRNA.	-0.750726	8.29609	-6.74324	0.000206136	0.00404513	0.360039
TC1100002207.mm.2	NM_001083587	Tns3	tensin 3	NM_001083587	RefSeq	Mus musculus tensin 3 (Tns3), mRNA.	-0.752103	7.64821	-6.9487	0.000169561	0.00352855	0.575862
TC0100003700.mm.2	NM_001083120	Enah	enabled homolog (Drosophila)	NM_001083120	RefSeq	Mus musculus enabled homolog (Drosophila) (Enah), transcript variant 3, mRNA.	-0.752752	9.31874	-7.05635	0.000153334	0.00329573	0.68704
TC0500003705.mm.2	NM_027009	Rfc3	replication factor C (activator 1) 3	NM_027009	RefSeq	Mus musculus replication factor C (activator 1) 3 (Rfc3), mRNA.	-0.75536	7.31167	-7.09217	0.000148327	0.00322824	0.723742
TC0700000896.mm.2	NM_001111016	Nav2	neuron navigator 2	NM_001111016	RefSeq	Mus musculus neuron navigator 2 (Nav2), transcript variant 2, mRNA.	-0.757819	10.072	-6.93587	0.000171619	0.00354683	0.562527
TC0200005146.mm.2	NM_080287	Elmo2	engulfment and cell motility 2	NM_080287	RefSeq	Mus musculus engulfment and cell motility 2 (Elmo2), transcript variant 3, mRNA.	-0.759348	7.92118	-6.78684	0.000197692	0.00392498	0.406247
TC1800001000.mm.2	NM_001252489	Osbpl1a	oxysterol binding protein-like 1A	NM_001252489	RefSeq	Mus musculus oxysterol binding protein-like 1A (Osbpl1a), transcript variant 2, mRNA.	-0.768278	8.64635	-7.49591	0.000102911	0.00248676	1.12791
TC0200000413.mm.2	NM_001081085	Sapcd2	suppressor APC domain containing 2	NM_001081085	RefSeq	Mus musculus suppressor APC domain containing 2 (Sapcd2), transcript variant 1, mRNA.	-0.768786	6.40352	-7.62229	9.20779e-05	0.00230214	1.25093
TC1500001506.mm.2	NM_009009	Rad21	RAD21 homolog (S. pombe)	NM_009009	RefSeq	Mus musculus RAD21 homolog (S. pombe) (Rad21), mRNA.	-0.774574	10.5034	-8.50254	4.41143e-05	0.00132628	2.06476
TC0400002141.mm.2	NM_177730	Impad1	inositol monophosphatase domain containing 1	NM_177730	RefSeq	Mus musculus inositol monophosphatase domain containing 1 (Impad1), mRNA.	-0.776132	9.90733	-6.49565	0.000262419	0.00484868	0.0934438
TC0300001423.mm.2	NM_019571	Tspan5	tetraspanin 5	NM_019571	RefSeq	Mus musculus tetraspanin 5 (Tspan5), transcript variant 1, mRNA.	-0.77783	8.92132	-6.68346	0.000218374	0.00421122	0.296335
TC1200000606.mm.2	NM_001163378	2700049A03Rik	RIKEN cDNA 2700049A03 gene	NM_001163378	RefSeq	Mus musculus RIKEN cDNA 2700049A03 gene (2700049A03Rik), transcript variant 1, mRNA.	-0.777913	7.85593	-8.33163	5.06324e-05	0.00145362	1.91236
TC1700001313.mm.2	NM_008628	Msh2	mutS homolog 2 (E. coli)	NM_008628	RefSeq	Mus musculus mutS homolog 2 (E. coli) (Msh2), mRNA.	-0.784419	9.35231	-8.12662	5.99209e-05	0.00164609	1.72608
TC0300001491.mm.2	NM_001253768	Ssx2ip	synovial sarcoma, X breakpoint 2 interacting protein	NM_001253768	RefSeq	Mus musculus synovial sarcoma, X breakpoint 2 interacting protein (Ssx2ip), transcript variant 2, mRNA.	-0.785915	7.08192	-7.44881	0.000107308	0.00257599	1.08165
TC1800000908.mm.2	NM_175542	Rttn	rotatin	NM_175542	RefSeq	Mus musculus rotatin (Rttn), mRNA.	-0.789499	7.02075	-6.79014	0.00019707	0.00391905	0.40973
TC0700002173.mm.2	NM_133777	Ube2s	ubiquitin-conjugating enzyme E2S	NM_133777	RefSeq	Mus musculus ubiquitin-conjugating enzyme E2S (Ube2s), mRNA.	-0.790758	10.5412	-7.05963	0.000152868	0.00328863	0.690405
TC1200001248.mm.2	NM_026752	Zfyve21	zinc finger, FYVE domain containing 21	NM_026752	RefSeq	Mus musculus zinc finger, FYVE domain containing 21 (Zfyve21), mRNA.	-0.791386	7.53116	-7.104	0.000146713	0.00321044	0.735834
TC0700003657.mm.2	NM_010176	Fah	fumarylacetoacetate hydrolase	NM_010176	RefSeq	Mus musculus fumarylacetoacetate hydrolase (Fah), mRNA.	-0.791604	9.61295	-6.4542	0.000273423	0.00499048	0.0480966
TC1300000177.mm.2	NM_178201	Hist1h2bn	histone cluster 1, H2bn	NM_178201	RefSeq	Mus musculus histone cluster 1, H2bn (Hist1h2bn), mRNA.	-0.793418	9.36054	-6.4567	0.000272745	0.00498941	0.0508343
TC1100001276.mm.2	NM_133360	Acaca	acetyl-Coenzyme A carboxylase alpha	NM_133360	RefSeq	Mus musculus acetyl-Coenzyme A carboxylase alpha (Acaca), mRNA.	-0.795798	9.2115	-7.58595	9.50566e-05	0.00235089	1.21572
TC0300002212.mm.2	NM_001281969	Glrb	glycine receptor, beta subunit	NM_001281969	RefSeq	Mus musculus glycine receptor, beta subunit (Glrb), transcript variant 2, mRNA.	-0.796161	10.7896	-8.23818	5.46493e-05	0.00154152	1.82793
TC1200002528.mm.2	NM_027269	Dnaaf2	dynein, axonemal assembly factor 2	NM_027269	RefSeq	Mus musculus dynein, axonemal assembly factor 2 (Dnaaf2), mRNA.	-0.796446	7.32019	-7.49542	0.000102956	0.00248676	1.12744
TC0600001203.mm.2	NM_011498	Bhlhe40	basic helix-loop-helix family, member e40	NM_011498	RefSeq	Mus musculus basic helix-loop-helix family, member e40 (Bhlhe40), mRNA.	-0.79699	9.12602	-7.27949	0.000124941	0.00285535	0.913425
TC1100000475.mm.2	NM_134250	Havcr2	hepatitis A virus cellular receptor 2	NM_134250	RefSeq	Mus musculus hepatitis A virus cellular receptor 2 (Havcr2), mRNA.	-0.798771	5.15428	-6.62189	0.000231832	0.00440754	0.230284
TC1900001428.mm.2	NM_001114339	Pank1	pantothenate kinase 1	NM_001114339	RefSeq	Mus musculus pantothenate kinase 1 (Pank1), transcript variant 1, mRNA.	-0.802235	7.01086	-6.8999	0.00017754	0.00363215	0.525041
TC0X00000313.mm.2	NM_001009947	Dock11	dedicator of cytokinesis 11	NM_001009947	RefSeq	Mus musculus dedicator of cytokinesis 11 (Dock11), mRNA.	-0.802592	8.77223	-6.74095	0.000206589	0.00404513	0.357615
TC0900002320.mm.2	NM_172771	Dmxl2	Dmx-like 2	NM_172771	RefSeq	Mus musculus Dmx-like 2 (Dmxl2), mRNA.	-0.805799	11.0062	-8.13286	5.96113e-05	0.00164318	1.73181
TC0900001295.mm.2	NM_001042607	Ryk	receptor-like tyrosine kinase	NM_001042607	RefSeq	Mus musculus receptor-like tyrosine kinase (Ryk), transcript variant 2, mRNA.	-0.806722	10.8351	-7.08803	0.000148896	0.0032338	0.719508
TC0600002200.mm.2	NM_001146689	Ezh2	enhancer of zeste 2 polycomb repressive complex 2 subunit	NM_001146689	RefSeq	Mus musculus enhancer of zeste homolog 2 (Drosophila) (Ezh2), transcript variant 2, mRNA.	-0.807123	10.1211	-7.28128	0.000124739	0.00285535	0.915216
TC0400000234.mm.2	NM_001122889	Epha7	Eph receptor A7	NM_001122889	RefSeq	Mus musculus Eph receptor A7 (Epha7), transcript variant 2, mRNA.	-0.807349	7.53473	-7.35477	0.00011673	0.00272614	0.98859
TC0400003330.mm.2	NM_025641	Uqcrh	ubiquinol-cytochrome c reductase hinge protein	NM_025641	RefSeq	Mus musculus ubiquinol-cytochrome c reductase hinge protein (Uqcrh), mRNA.	-0.809643	10.6047	-7.81603	7.78631e-05	0.00202939	1.43639
TC1400000119.mm.2	NM_001033270	Slc4a7	solute carrier family 4, sodium bicarbonate cotransporter, member 7	NM_001033270	RefSeq	Mus musculus solute carrier family 4, sodium bicarbonate cotransporter, member 7 (Slc4a7), mRNA.	-0.811666	8.86216	-8.17097	5.77596e-05	0.00161234	1.76671
TC1800001087.mm.2	NM_001004361	Tpgs2	tubulin polyglutamylase complex subunit 2	NM_001004361	RefSeq	Mus musculus tubulin polyglutamylase complex subunit 2 (Tpgs2), transcript variant 1, mRNA.	-0.811902	10.3023	-8.45735	4.5741e-05	0.00135499	2.02471
TC1500000663.mm.2	NM_001161712	Gcat	glycine C-acetyltransferase (2-amino-3-ketobutyrate-coenzyme A ligase)	NM_001161712	RefSeq	Mus musculus glycine C-acetyltransferase (2-amino-3-ketobutyrate-coenzyme A ligase) (Gcat), transcript variant 2, mRNA.	-0.815434	6.5687	-7.44323	0.000107843	0.00257906	1.07616
TC0500001724.mm.2	NM_007984	Fscn1	fascin homolog 1, actin bundling protein (Strongylocentrotus purpuratus)	NM_007984	RefSeq	Mus musculus fascin homolog 1, actin bundling protein (Strongylocentrotus purpuratus) (Fscn1), mRNA.	-0.816556	9.58518	-7.43505	0.000108631	0.00258515	1.0681
TC1800000712.mm.2	NM_027556	Cep192	centrosomal protein 192	NM_027556	RefSeq	Mus musculus centrosomal protein 192 (Cep192), mRNA.	-0.81741	9.28568	-6.66358	0.000222622	0.00426595	0.275056
TC1200001263.mm.2	NM_001161737	Siva1	SIVA1, apoptosis-inducing factor	NM_001161737	RefSeq	Mus musculus SIVA1, apoptosis-inducing factor (Siva1), transcript variant 2, mRNA.	-0.81937	8.79403	-7.91501	7.15628e-05	0.00189286	1.52971
TC0700001841.mm.2	NM_001253872	Itgal	integrin alpha L	NM_001253872	RefSeq	Mus musculus integrin alpha L (Itgal), transcript variant 1, mRNA.	-0.822449	6.23069	-7.01643	0.000159141	0.00337015	0.645958
TC1800001026.mm.2	NM_007664	Cdh2	cadherin 2	NM_007664	RefSeq	Mus musculus cadherin 2 (Cdh2), mRNA.	-0.823358	10.4787	-8.24051	5.45453e-05	0.00154152	1.83004
TC1500000053.mm.2	NM_133227	Nup155	nucleoporin 155	NM_133227	RefSeq	Mus musculus nucleoporin 155 (Nup155), mRNA.	-0.824432	9.39225	-7.47624	0.000104723	0.0025244	1.10862
TC1100003300.mm.2	NM_133706	Tmem97	transmembrane protein 97	NM_133706	RefSeq	Mus musculus transmembrane protein 97 (Tmem97), mRNA.	-0.825578	9.54012	-6.9445	0.000170232	0.00352987	0.571497
TC0900002018.mm.2	NM_029762	Hyls1	hydrolethalus syndrome 1	NM_029762	RefSeq	Mus musculus hydrolethalus syndrome 1 (Hyls1), mRNA.	-0.827872	8.40504	-7.36105	0.000116072	0.0027168	0.994838
TC1700002368.mm.2	NM_010109	Efna5	ephrin A5	NM_010109	RefSeq	Mus musculus ephrin A5 (Efna5), transcript variant 2, mRNA.	-0.828016	8.99525	-7.43816	0.000108331	0.0025835	1.07116
TC1000002003.mm.2	ENSMUST00000080898	Amd2	S-adenosylmethionine decarboxylase 2	ENSMUST00000080898	ENSEMBL	S-adenosylmethionine decarboxylase 2 [gene_biotype:protein_coding transcript_biotype:protein_coding]	-0.829661	8.27396	-7.5736	9.60932e-05	0.00236106	1.20372
TC0500003738.mm.2	NM_008788	Pcolce	procollagen C-endopeptidase enhancer protein	NM_008788	RefSeq	Mus musculus procollagen C-endopeptidase enhancer protein (Pcolce), mRNA.	-0.830068	8.01466	-8.61073	4.0477e-05	0.0012369	2.1599
TC0900002115.mm.2	NM_172769	Sc5d	sterol-C5-desaturase (fungal ERG3, delta-5-desaturase) homolog (S. cerevisae)	NM_172769	RefSeq	Mus musculus sterol-C5-desaturase (fungal ERG3, delta-5-desaturase) homolog (S. cerevisae) (Sc5d), mRNA.	-0.830617	10.376	-7.5782	9.57052e-05	0.0023569	1.2082
TC0100002063.mm.2	NM_001081079	Ogfrl1	opioid growth factor receptor-like 1	NM_001081079	RefSeq	Mus musculus opioid growth factor receptor-like 1 (Ogfrl1), mRNA.	-0.834627	7.83105	-8.32514	5.09005e-05	0.00145959	1.90652
TC1300002053.mm.2	NM_016662	Mxd3	Max dimerization protein 3	NM_016662	RefSeq	Mus musculus Max dimerization protein 3 (Mxd3), mRNA.	-0.838201	6.62874	-8.6942	3.79007e-05	0.0011775	2.23261
TC1200001351.mm.2	NM_134046	Cenpo	centromere protein O	NM_134046	RefSeq	Mus musculus centromere protein O (Cenpo), mRNA.	-0.838333	7.516	-7.63481	9.10764e-05	0.0022913	1.26302
TC0900002047.mm.2	NM_001081429	Ccdc15	coiled-coil domain containing 15	NM_001081429	RefSeq	Mus musculus coiled-coil domain containing 15 (Ccdc15), mRNA.	-0.841314	8.4839	-8.19487	5.66315e-05	0.0015845	1.78853
TC0X00002053.mm.2	NM_001177323	2018-09-06	septin 6	NM_001177323	RefSeq	Mus musculus septin 6 (Sept6), transcript variant 3, mRNA.	-0.842581	7.42898	-7.25603	0.00012763	0.00290038	0.889877
TC0500001546.mm.2	NM_030719	Gatsl2	GATS protein-like 2	NM_030719	RefSeq	Mus musculus GATS protein-like 2 (Gatsl2), mRNA.	-0.843766	7.23493	-6.93501	0.000171758	0.00354683	0.561634
TC0100001387.mm.2	NM_008131	Glul	glutamate-ammonia ligase (glutamine synthetase)	NM_008131	RefSeq	Mus musculus glutamate-ammonia ligase (glutamine synthetase) (Glul), mRNA.	-0.843777	8.60163	-9.20529	2.56237e-05	0.000877239	2.66527
TC0900002003.mm.2	NM_009178	St3gal4	ST3 beta-galactoside alpha-2,3-sialyltransferase 4	NM_009178	RefSeq	Mus musculus ST3 beta-galactoside alpha-2,3-sialyltransferase 4 (St3gal4), mRNA.	-0.844336	9.60489	-7.28036	0.000124843	0.00285535	0.914295
TC1100002592.mm.2	NM_028185	Lsm11	U7 snRNP-specific Sm-like protein LSM11	NM_028185	RefSeq	Mus musculus U7 snRNP-specific Sm-like protein LSM11 (Lsm11), mRNA.	-0.844788	7.16612	-7.86776	7.44963e-05	0.00195549	1.48527
TC0200000587.mm.2	NM_001025310	St6galnac6	ST6 (alpha-N-acetyl-neuraminyl-2,3-beta-galactosyl-1,3)-N-acetylgalactosaminide alpha-2,6-sialyltransferase 6	NM_001025310	RefSeq	Mus musculus ST6 (alpha-N-acetyl-neuraminyl-2,3-beta-galactosyl-1, 3)-N-acetylgalactosaminide alpha-2,6-sialyltransferase 6 (St6galnac6), transcript variant 2, mRNA.	-0.844954	8.36451	-9.17327	2.62455e-05	0.000892126	2.63877
TC1100001329.mm.2	NM_025377	Ska2	spindle and kinetochore associated complex subunit 2	NM_025377	RefSeq	Mus musculus spindle and kinetochore associated complex subunit 2 (Ska2), mRNA.	-0.84686	9.42089	-7.67248	8.81347e-05	0.00223355	1.29934
TC0300002334.mm.2	NM_001253751	Fdps	farnesyl diphosphate synthetase	NM_001253751	RefSeq	Mus musculus farnesyl diphosphate synthetase (Fdps), transcript variant 1, mRNA.	-0.850724	8.32888	-7.6608	8.90354e-05	0.00225165	1.28809
TC0100000055.mm.2	NM_001033636	Prex2	phosphatidylinositol-3,4,5-trisphosphate-dependent Rac exchange factor 2	NM_001033636	RefSeq	Mus musculus phosphatidylinositol-3,4,5-trisphosphate-dependent Rac exchange factor 2 (Prex2), transcript variant 2, mRNA.	-0.852461	9.22021	-6.75295	0.000204222	0.00403303	0.370348
TC0400000726.mm.2	NM_144905	6330416G13Rik	RIKEN cDNA 6330416G13 gene	NM_144905	RefSeq	Mus musculus RIKEN cDNA 6330416G13 gene (6330416G13Rik), mRNA.	-0.853664	8.89436	-6.61678	0.00023299	0.00441572	0.224783
TC1200001562.mm.2	NM_009234	Sox11	SRY (sex determining region Y)-box 11	NM_009234	RefSeq	Mus musculus SRY (sex determining region Y)-box 11 (Sox11), mRNA.	-0.855151	9.4924	-7.18307	0.000136417	0.00304159	0.816267
TC0900000126.mm.2	NM_172289	Slc36a4	solute carrier family 36 (proton/amino acid symporter), member 4	NM_172289	RefSeq	Mus musculus solute carrier family 36 (proton/amino acid symporter), member 4 (Slc36a4), mRNA.	-0.855688	7.53517	-8.43026	4.67484e-05	0.00137808	2.00062
TC1900000077.mm.2	NM_026616	Rnaseh2c	ribonuclease H2, subunit C	NM_026616	RefSeq	Mus musculus ribonuclease H2, subunit C (Rnaseh2c), mRNA.	-0.858431	7.90903	-7.71976	8.4593e-05	0.0021619	1.3447
TC1400002714.mm.2	NM_001033336	Abcc4	ATP-binding cassette, sub-family C (CFTR/MRP), member 4	NM_001033336	RefSeq	Mus musculus ATP-binding cassette, sub-family C (CFTR/MRP), member 4 (Abcc4), transcript variant 1, mRNA.	-0.862185	9.05714	-7.04781	0.000154556	0.00331611	0.678263
TC1700002564.mm.2	NM_026514	Cdc42ep3	CDC42 effector protein (Rho GTPase binding) 3	NM_026514	RefSeq	Mus musculus CDC42 effector protein (Rho GTPase binding) 3 (Cdc42ep3), mRNA.	-0.862432	7.23413	-8.81384	3.45226e-05	0.00110081	2.33582
TC0700004388.mm.2	NM_001162855	Nsmce4a	non-SMC element 4 homolog A (S. cerevisiae)	NM_001162855	RefSeq	Mus musculus non-SMC element 4 homolog A (S. cerevisiae) (Nsmce4a), mRNA.	-0.862459	8.04144	-9.01756	2.95211e-05	0.000970745	2.50881
TC1600001805.mm.2	NM_174848	Crybg3	beta-gamma crystallin domain containing 3	NM_174848	RefSeq	Mus musculus beta-gamma crystallin domain containing 3 (Crybg3), mRNA.	-0.863353	6.82017	-8.53684	4.2923e-05	0.00129368	2.09503
TC1600002182.mm.2	NM_021720	Donson	downstream neighbor of SON	NM_021720	RefSeq	Mus musculus downstream neighbor of SON (Donson), mRNA.	-0.864866	8.16978	-6.68584	0.000217872	0.00420489	0.298877
TC0300002310.mm.2	NM_025928	Pmf1	polyamine-modulated factor 1	NM_025928	RefSeq	Mus musculus polyamine-modulated factor 1 (Pmf1), transcript variant 1, mRNA.	-0.867723	8.10397	-9.13265	2.70587e-05	0.000913355	2.60506
TC0400000992.mm.2	NM_146144	Usp1	ubiquitin specific peptidase 1	NM_146144	RefSeq	Mus musculus ubiquitin specific peptidase 1 (Usp1), transcript variant 2, mRNA.	-0.868051	10.1515	-8.6037	4.07029e-05	0.00124224	2.15375
TC0700001576.mm.2	NM_021889	Syt9	synaptotagmin IX	NM_021889	RefSeq	Mus musculus synaptotagmin IX (Syt9), mRNA.	-0.869951	9.22346	-7.44557	0.000107618	0.00257623	1.07846
TC0100000380.mm.2	NM_001142647	Tmem194b	transmembrane protein 194B	NM_001142647	RefSeq	Mus musculus transmembrane protein 194B (Tmem194b), transcript variant 1, mRNA.	-0.870919	6.72593	-6.54087	0.000250974	0.00468678	0.142678
TC0800002421.mm.2	NM_001163042	Haus8	4HAUS augmin-like complex, subunit 8	NM_001163042	RefSeq	Mus musculus 4HAUS augmin-like complex, subunit 8 (Haus8), transcript variant 1, mRNA.	-0.871094	7.6034	-8.55335	4.23624e-05	0.00128157	2.10956
TC1500000008.mm.2	NM_024188	Oxct1	3-oxoacid CoA transferase 1	NM_024188	RefSeq	Mus musculus 3-oxoacid CoA transferase 1 (Oxct1), mRNA.	-0.871808	10.9695	-6.68678	0.000217674	0.00420442	0.299881
TC1400002096.mm.2	NM_145705	Tinf2	Terf1 (TRF1)-interacting nuclear factor 2	NM_145705	RefSeq	Mus musculus Terf1 (TRF1)-interacting nuclear factor 2 (Tinf2), mRNA.	-0.874592	7.82563	-8.05145	6.37938e-05	0.00173087	1.65681
TC1300000882.mm.2	NM_145376	Lpcat1	lysophosphatidylcholine acyltransferase 1	NM_145376	RefSeq	Mus musculus lysophosphatidylcholine acyltransferase 1 (Lpcat1), mRNA.	-0.874707	7.49474	-7.03844	0.000155909	0.00332214	0.668631
TC1600001280.mm.2	NM_022324	Sdf2l1	stromal cell-derived factor 2-like 1	NM_022324	RefSeq	Mus musculus stromal cell-derived factor 2-like 1 (Sdf2l1), mRNA.	-0.876986	9.24792	-8.01535	6.57533e-05	0.00176622	1.62335
TC0700000991.mm.2	NM_001081163	Chsy1	chondroitin sulfate synthase 1	NM_001081163	RefSeq	Mus musculus chondroitin sulfate synthase 1 (Chsy1), mRNA.	-0.877478	8.83954	-6.95239	0.000168974	0.00351937	0.579691
TC1400000158.mm.2	NM_008695	Nid2	nidogen 2	NM_008695	RefSeq	Mus musculus nidogen 2 (Nid2), mRNA.	-0.878938	6.5212	-7.01629	0.000159161	0.00337015	0.645812
TC1600000760.mm.2	NM_028523	Dcbld2	discoidin, CUB and LCCL domain containing 2	NM_028523	RefSeq	Mus musculus discoidin, CUB and LCCL domain containing 2 (Dcbld2), mRNA.	-0.879426	8.5853	-8.6626	3.88537e-05	0.00120094	2.20516
TC0700002426.mm.2	NM_001285891	Sae1	SUMO1 activating enzyme subunit 1	NM_001285891	RefSeq	Mus musculus SUMO1 activating enzyme subunit 1 (Sae1), transcript variant 2, mRNA.	-0.881715	9.62918	-9.04733	2.88608e-05	0.000958148	2.53381
TC0400001856.mm.2	NM_001172424	Dhrs3	dehydrogenase/reductase (SDR family) member 3	NM_001172424	RefSeq	Mus musculus dehydrogenase/reductase (SDR family) member 3 (Dhrs3), transcript variant 2, mRNA.	-0.884305	6.59243	-6.65592	0.000224283	0.00428759	0.266846
TC0400001773.mm.2	NM_001164366	Atp13a2	ATPase type 13A2	NM_001164366	RefSeq	Mus musculus ATPase type 13A2 (Atp13a2), transcript variant 2, mRNA.	-0.885181	8.75084	-6.97655	0.000165186	0.00345592	0.604749
TC0100002838.mm.2	NM_001105667	Dtymk	deoxythymidylate kinase	NM_001105667	RefSeq	Mus musculus deoxythymidylate kinase (Dtymk), transcript variant 1, mRNA.	-0.885648	8.98085	-8.04572	6.41006e-05	0.00173725	1.65151
TC0500001487.mm.2	NM_177005	Glt1d1	glycosyltransferase 1 domain containing 1	NM_177005	RefSeq	Mus musculus glycosyltransferase 1 domain containing 1 (Glt1d1), mRNA.	-0.885708	4.83002	-7.03826	0.000155935	0.00332214	0.668446
TC0400004190.mm.2	NM_146151	Tesk2	testis-specific kinase 2	NM_146151	RefSeq	Mus musculus testis-specific kinase 2 (Tesk2), mRNA.	-0.886193	7.55397	-7.23008	0.000130681	0.00294757	0.86376
TC1400001676.mm.2	NM_011894	Sh3bp5	SH3-domain binding protein 5 (BTK-associated)	NM_011894	RefSeq	Mus musculus SH3-domain binding protein 5 (BTK-associated) (Sh3bp5), mRNA.	-0.890278	8.51213	-8.34807	4.99607e-05	0.00143835	1.92713
TC0500001096.mm.2	NM_028481	Ccdc18	coiled-coil domain containing 18	NM_028481	RefSeq	Mus musculus coiled-coil domain containing 18 (Ccdc18), mRNA.	-0.891039	5.32276	-7.23236	0.00013041	0.0029442	0.866057
TC0X00002192.mm.2	NM_134163	Mbnl3	muscleblind-like 3 (Drosophila)	NM_134163	RefSeq	Mus musculus muscleblind-like 3 (Drosophila) (Mbnl3), transcript variant 1, mRNA.	-0.891734	6.71572	-6.67552	0.00022006	0.00423026	0.287839
TC1300001927.mm.2	NM_016785	Tpmt	thiopurine methyltransferase	NM_016785	RefSeq	Mus musculus thiopurine methyltransferase (Tpmt), mRNA.	-0.892021	7.27299	-8.75369	3.61766e-05	0.00113413	2.28409
TC0700001822.mm.2	NM_172746	Hirip3	HIRA interacting protein 3	NM_172746	RefSeq	Mus musculus HIRA interacting protein 3 (Hirip3), mRNA.	-0.892117	6.70177	-7.30025	0.000122614	0.00282082	0.934212
TC0500003221.mm.2	NM_001003953	Kdm2b	lysine (K)-specific demethylase 2B	NM_001003953	RefSeq	Mus musculus lysine (K)-specific demethylase 2B (Kdm2b), transcript variant 1, mRNA.	-0.893405	6.34127	-8.43843	4.64422e-05	0.00137095	2.00789
TC1900001617.mm.2	NM_001164363	Nt5c2	5-nucleotidase, cytosolic II	NM_001164363	RefSeq	Mus musculus 5-nucleotidase, cytosolic II (Nt5c2), transcript variant 1, mRNA.	-0.893822	9.2872	-7.72085	8.45135e-05	0.0021619	1.34574
TC0600001922.mm.2	NM_138587	Fam3c	family with sequence similarity 3, member C	NM_138587	RefSeq	Mus musculus family with sequence similarity 3, member C (Fam3c), mRNA.	-0.896121	8.95262	-7.95486	6.91894e-05	0.00184419	1.56701
TC1200001899.mm.2	NM_026038	L3hypdh	L-3-hydroxyproline dehydratase (trans-)	NM_026038	RefSeq	Mus musculus L-3-hydroxyproline dehydratase (trans-) (L3hypdh), mRNA.	-0.897007	7.65585	-6.92662	0.000173121	0.00357193	0.552898
TC0100003836.mm.2	NM_001044751	Hsd11b1	hydroxysteroid 11-beta dehydrogenase 1	NM_001044751	RefSeq	Mus musculus hydroxysteroid 11-beta dehydrogenase 1 (Hsd11b1), transcript variant 2, mRNA.	-0.897929	7.20299	-6.65715	0.000224015	0.00428587	0.268163
TC1800000092.mm.2	NM_001081223	Rbbp8	retinoblastoma binding protein 8	NM_001081223	RefSeq	Mus musculus retinoblastoma binding protein 8 (Rbbp8), transcript variant 1, mRNA.	-0.898163	8.93003	-6.70522	0.000213828	0.00414915	0.31957
TC1200001110.mm.2	NM_001163394	Evl	Ena-vasodilator stimulated phosphoprotein	NM_001163394	RefSeq	Mus musculus Ena-vasodilator stimulated phosphoprotein (Evl), transcript variant 1, mRNA.	-0.899009	9.2684	-7.19515	0.000134918	0.00302341	0.828487
TC1900001027.mm.2	NM_001185164	Vegfb	vascular endothelial growth factor B	NM_001185164	RefSeq	Mus musculus vascular endothelial growth factor B (Vegfb), transcript variant 2, mRNA.	-0.904211	9.32831	-8.06134	6.32684e-05	0.00171854	1.66596
TC0600003311.mm.2	NM_001167694	Gpr19	G protein-coupled receptor 19	NM_001167694	RefSeq	Mus musculus G protein-coupled receptor 19 (Gpr19), transcript variant 3, mRNA.	-0.908474	7.46601	-8.29687	5.20869e-05	0.00148617	1.88104
TC0900002142.mm.2	NM_153762	Rnf26	ring finger protein 26	NM_153762	RefSeq	Mus musculus ring finger protein 26 (Rnf26), mRNA.	-0.909146	8.91996	-7.21537	0.000132447	0.00298462	0.848922
TC0800002832.mm.2	NM_198299	Enkd1	enkurin domain containing 1	NM_198299	RefSeq	Mus musculus enkurin domain containing 1 (Enkd1), mRNA.	-0.909879	7.05711	-7.06439	0.000152194	0.00328582	0.695288
TC1100003221.mm.2	NM_001164223	Rpa1	replication protein A1	NM_001164223	RefSeq	Mus musculus replication protein A1 (Rpa1), transcript variant 1, mRNA.	-0.911807	9.71595	-9.72311	1.75572e-05	0.000649725	3.08278
TC0200002850.mm.2	NM_022724	Suv39h2	suppressor of variegation 3-9 homolog 2 (Drosophila)	NM_022724	RefSeq	Mus musculus suppressor of variegation 3-9 homolog 2 (Drosophila) (Suv39h2), transcript variant 1, mRNA.	-0.912799	7.55088	-8.50666	4.39693e-05	0.00132356	2.0684
TC0400003832.mm.2	NM_001122954	Pla2g5	phospholipase A2, group V	NM_001122954	RefSeq	Mus musculus phospholipase A2, group V (Pla2g5), transcript variant 1, mRNA.	-0.915218	7.76009	-6.92219	0.000173845	0.00358077	0.548283
TC1200002439.mm.2	NM_028023	Cdca4	cell division cycle associated 4	NM_028023	RefSeq	Mus musculus cell division cycle associated 4 (Cdca4), mRNA.	-0.915356	9.34387	-6.7155	0.000211716	0.00411803	0.330535
TC1500000407.mm.2	NM_001081396	Tbc1d31	TBC1 domain family, member 31	NM_001081396	RefSeq	Mus musculus TBC1 domain family, member 31 (Tbc1d31), transcript variant 1, mRNA.	-0.918923	8.67423	-8.43822	4.64498e-05	0.00137095	2.00771
TC0800000126.mm.2	NM_009361	Tfdp1	transcription factor Dp 1	NM_009361	RefSeq	Mus musculus transcription factor Dp 1 (Tfdp1), transcript variant 1, mRNA.	-0.92061	10.2709	-8.20953	5.59519e-05	0.00157276	1.80188
TC1300000175.mm.2	NM_178200	Hist1h2bm	histone cluster 1, H2bm	NM_178200	RefSeq	Mus musculus histone cluster 1, H2bm (Hist1h2bm), mRNA.	-0.921608	9.27859	-6.85865	0.000184614	0.00372957	0.481871
TC0X00001322.mm.2	NM_011712	Wbp5	WW domain binding protein 5	NM_011712	RefSeq	Mus musculus WW domain binding protein 5 (Wbp5), mRNA.	-0.921625	9.28019	-6.56014	0.000246266	0.00462384	0.163587
TC1800001632.mm.2	NM_146089	Haus1	HAUS augmin-like complex, subunit 1	NM_146089	RefSeq	Mus musculus HAUS augmin-like complex, subunit 1 (Haus1), mRNA.	-0.923559	8.73357	-8.02622	6.51563e-05	0.00175429	1.63344
TC0600002963.mm.2	NM_010774	Mbd4	methyl-CpG binding domain protein 4	NM_010774	RefSeq	Mus musculus methyl-CpG binding domain protein 4 (Mbd4), mRNA.	-0.923603	6.85297	-6.78701	0.00019766	0.00392498	0.406424
TC1900001205.mm.2	NM_198019	Cep78	centrosomal protein 78	NM_198019	RefSeq	Mus musculus centrosomal protein 78 (Cep78), mRNA.	-0.926311	7.42576	-9.59109	1.93011e-05	0.000699291	2.97823
TC1300000191.mm.2	NM_175665	Hist1h2bk	histone cluster 1, H2bk	NM_175665	RefSeq	Mus musculus histone cluster 1, H2bk (Hist1h2bk), mRNA.	-0.927723	8.90707	-6.86969	0.00018269	0.00370628	0.493444
TC0600002946.mm.2	NM_026894	Tamm41	TAM41, mitochondrial translocator assembly and maintenance protein, homolog (S. cerevisiae)	NM_026894	RefSeq	Mus musculus TAM41, mitochondrial translocator assembly and maintenance protein, homolog (S. cerevisiae) (Tamm41), mRNA.	-0.928319	8.22399	-9.35457	2.29355e-05	0.000798684	2.78771
TC0300002711.mm.2	NM_172271	Slc6a17	solute carrier family 6 (neurotransmitter transporter), member 17	NM_172271	RefSeq	Mus musculus solute carrier family 6 (neurotransmitter transporter), member 17 (Slc6a17), transcript variant 2, mRNA.	-0.93336	9.45916	-9.8417	1.61407e-05	0.000612285	3.17562
TC0500000307.mm.2	NM_001289522	Cad	carbamoyl-phosphate synthetase 2, aspartate transcarbamylase, and dihydroorotase	NM_001289522	RefSeq	Mus musculus carbamoyl-phosphate synthetase 2, aspartate transcarbamylase, and dihydroorotase (Cad), transcript variant 2, mRNA.	-0.934834	7.24574	-6.4862	0.000264884	0.00487878	0.0831215
TC0800000936.mm.2	NM_181039	Adgrl1	adhesion G protein-coupled receptor L1	NM_181039	RefSeq	Mus musculus adhesion G protein-coupled receptor L1 (Adgrl1), mRNA.	-0.941049	7.45085	-9.03117	2.92171e-05	0.000967321	2.52025
TC0200005015.mm.2	NM_001139516	Rbl1	retinoblastoma-like 1 (p107)	NM_001139516	RefSeq	Mus musculus retinoblastoma-like 1 (p107) (Rbl1), transcript variant 2, mRNA.	-0.941126	8.98309	-8.0138	6.58386e-05	0.00176655	1.62192
TC1200002346.mm.2	NM_001159910	Ccdc85c	coiled-coil domain containing 85C	NM_001159910	RefSeq	Mus musculus coiled-coil domain containing 85C (Ccdc85c), mRNA.	-0.941523	7.32033	-7.84208	7.61468e-05	0.00199449	1.46104
TC0300003113.mm.2	NM_001081298	Adgrl2	adhesion G protein-coupled receptor L2	NM_001081298	RefSeq	Mus musculus adhesion G protein-coupled receptor L2 (Adgrl2), mRNA.	-0.942229	8.94506	-8.39238	4.81992e-05	0.00140375	1.96683
TC0400000514.mm.2	NM_172693	Galnt12	UDP-N-acetyl-alpha-D-galactosamine:polypeptide N-acetylgalactosaminyltransferase 12	NM_172693	RefSeq	Mus musculus UDP-N-acetyl-alpha-D-galactosamine:polypeptide N-acetylgalactosaminyltransferase 12 (Galnt12), mRNA.	-0.942862	6.56693	-7.96311	6.87087e-05	0.00183339	1.57472
TC0400001107.mm.2	NM_053272	Dhcr24	24-dehydrocholesterol reductase	NM_053272	RefSeq	Mus musculus 24-dehydrocholesterol reductase (Dhcr24), mRNA.	-0.943267	8.44531	-9.09075	2.79274e-05	0.00093615	2.57014
TC0800000987.mm.2	NM_001163791	Orc6	origin recognition complex, subunit 6	NM_001163791	RefSeq	Mus musculus origin recognition complex, subunit 6 (Orc6), transcript variant 2, mRNA.	-0.944209	8.47794	-8.71329	3.73377e-05	0.00116449	2.24916
TC0200004207.mm.2	NM_178886	Ldlrad3	low density lipoprotein receptor class A domain containing 3	NM_178886	RefSeq	Mus musculus low density lipoprotein receptor class A domain containing 3 (Ldlrad3), transcript variant 1, mRNA.	-0.945974	8.62285	-7.18255	0.000136483	0.00304159	0.815733
TC0800000371.mm.2	NM_001012517	Fut10	fucosyltransferase 10	NM_001012517	RefSeq	Mus musculus fucosyltransferase 10 (Fut10), transcript variant 2, mRNA.	-0.9461	8.26784	-10.3097	1.16794e-05	0.000485677	3.53246
TC1700000657.mm.2	NM_001110101	Lsm2	LSM2 homolog, U6 small nuclear RNA associated (S. cerevisiae)	NM_001110101	RefSeq	Mus musculus LSM2 homolog, U6 small nuclear RNA associated (S. cerevisiae) (Lsm2), transcript variant 2, mRNA.	-0.950249	8.271	-9.73324	1.74309e-05	0.000647029	3.09075
TC1200002411.mm.2	NM_021273	Ckb	creatine kinase, brain	NM_021273	RefSeq	Mus musculus creatine kinase, brain (Ckb), mRNA.	-0.950278	10.578	-8.28721	5.24993e-05	0.00149281	1.87232
TC1600001089.mm.2	NM_019517	Bace2	beta-site APP-cleaving enzyme 2	NM_019517	RefSeq	Mus musculus beta-site APP-cleaving enzyme 2 (Bace2), mRNA.	-0.952939	10.4795	-9.60059	1.91693e-05	0.000696837	2.9858
TC0300000574.mm.2	NM_133786	Smc4	structural maintenance of chromosomes 4	NM_133786	RefSeq	Mus musculus structural maintenance of chromosomes 4 (Smc4), mRNA.	-0.953584	10.1523	-8.19814	5.6479e-05	0.0015839	1.79151
TC0X00002236.mm.2	NM_001166365	Fam122b	family with sequence similarity 122, member B	NM_001166365	RefSeq	Mus musculus family with sequence similarity 122, member B (Fam122b), transcript variant 1, mRNA.	-0.95636	7.37604	-7.58854	9.48403e-05	0.00234936	1.21824
TC0200004671.mm.2	NM_011045	Pcna	proliferating cell nuclear antigen	NM_011045	RefSeq	Mus musculus proliferating cell nuclear antigen (Pcna), mRNA.	-0.956521	11.8656	-9.95926	1.48624e-05	0.000580944	3.26667
TC0200000636.mm.2	NM_001206367	Gsn	gelsolin	NM_001206367	RefSeq	Mus musculus gelsolin (Gsn), transcript variant 2, mRNA.	-0.958269	8.58396	-7.97771	6.78683e-05	0.00181698	1.58834
TC0700004409.mm.2	NM_016978	Oat	ornithine aminotransferase	NM_016978	RefSeq	Mus musculus ornithine aminotransferase (Oat), mRNA.	-0.959611	10.8269	-8.31547	5.13028e-05	0.00146939	1.89781
TC0300002725.mm.2	NM_010358	Gstm1	glutathione S-transferase, mu 1	NM_010358	RefSeq	Mus musculus glutathione S-transferase, mu 1 (Gstm1), mRNA.	-0.960416	9.87746	-6.91864	0.000174427	0.0035836	0.544592
TC0X00003329.mm.2	NM_009173	Siah1b	seven in absentia 1B	NM_009173	RefSeq	Mus musculus seven in absentia 1B (Siah1b), transcript variant 2, mRNA.	-0.960457	6.86343	-7.28821	0.000123957	0.00284092	0.922164
TC1600001827.mm.2	NM_010140	Epha3	Eph receptor A3	NM_010140	RefSeq	Mus musculus Eph receptor A3 (Epha3), mRNA.	-0.963898	9.69093	-8.88573	3.26565e-05	0.0010524	2.39725
TC1400002757.mm.2	NM_028651	Tmtc4	transmembrane and tetratricopeptide repeat containing 4	NM_028651	RefSeq	Mus musculus transmembrane and tetratricopeptide repeat containing 4 (Tmtc4), mRNA.	-0.965249	8.48572	-8.02891	6.50092e-05	0.00175429	1.63594
TC1100001331.mm.2	NM_197987	Trim37	tripartite motif-containing 37	NM_197987	RefSeq	Mus musculus tripartite motif-containing 37 (Trim37), mRNA.	-0.967128	8.88003	-9.99461	1.45005e-05	0.000571563	3.29387
TC1100001994.mm.2	NM_007623	Cbx2	chromobox 2	NM_007623	RefSeq	Mus musculus chromobox 2 (Cbx2), mRNA.	-0.96948	6.93268	-7.34707	0.000117541	0.00273532	0.98093
TC0500002272.mm.2	NM_021292	Evc	Ellis van Creveld gene syndrome	NM_021292	RefSeq	Mus musculus Ellis van Creveld gene syndrome (Evc), mRNA.	-0.97269	7.45119	-7.1301	0.000143221	0.00314826	0.762464
TC0700001689.mm.2	NM_175645	Xylt1	xylosyltransferase 1	NM_175645	RefSeq	Mus musculus xylosyltransferase 1 (Xylt1), mRNA.	-0.974476	8.82152	-6.96668	0.000166722	0.00347845	0.594521
TC0200004665.mm.2	NM_175445	Rassf2	Ras association (RalGDS/AF-6) domain family member 2	NM_175445	RefSeq	Mus musculus Ras association (RalGDS/AF-6) domain family member 2 (Rassf2), mRNA.	-0.974955	8.3166	-7.44679	0.000107501	0.00257599	1.07966
TC1600000485.mm.2	NM_172824	Ccdc14	coiled-coil domain containing 14	NM_172824	RefSeq	Mus musculus coiled-coil domain containing 14 (Ccdc14), mRNA.	-0.980039	7.44161	-7.17469	0.00013747	0.00305794	0.807771
TC0800001142.mm.2	NM_030198	Gins3	GINS complex subunit 3 (Psf3 homolog)	NM_030198	RefSeq	Mus musculus GINS complex subunit 3 (Psf3 homolog) (Gins3), mRNA.	-0.980914	8.40713	-7.62984	9.14721e-05	0.00229648	1.25823
TC1300000660.mm.2	NM_001038018	Grk6	G protein-coupled receptor kinase 6	NM_001038018	RefSeq	Mus musculus G protein-coupled receptor kinase 6 (Grk6), transcript variant 1, mRNA.	-0.981113	7.36526	-8.38408	4.85236e-05	0.00140812	1.95941
TC1700001634.mm.2	NM_023055	Slc9a3r2	solute carrier family 9 (sodium/hydrogen exchanger), member 3 regulator 2	NM_023055	RefSeq	Mus musculus solute carrier family 9 (sodium/hydrogen exchanger), member 3 regulator 2 (Slc9a3r2), transcript variant A, mRNA.	-0.981529	7.15974	-9.81727	1.64217e-05	0.000619361	3.15658
TC0800002060.mm.2	NM_001081150	Lonrf1	LON peptidase N-terminal domain and ring finger 1	NM_001081150	RefSeq	Mus musculus LON peptidase N-terminal domain and ring finger 1 (Lonrf1), mRNA.	-0.982591	7.77189	-8.45809	4.57137e-05	0.00135499	2.02537
TC0500002386.mm.2	NM_133911	Adgra3	adhesion G protein-coupled receptor A3	NM_133911	RefSeq	Mus musculus adhesion G protein-coupled receptor A3 (Adgra3), mRNA.	-0.982902	9.44298	-8.02856	6.50282e-05	0.00175429	1.63561
TC0800003178.mm.2	NM_053207	Egln1	egl-9 family hypoxia-inducible factor 1	NM_053207	RefSeq	Mus musculus egl-9 family hypoxia-inducible factor 1 (Egln1), mRNA.	-0.983707	9.99808	-8.28969	5.2393e-05	0.00149178	1.87456
TC1200000348.mm.2	NM_001163154	Etv1	ets variant 1	NM_001163154	RefSeq	Mus musculus ets variant 1 (Etv1), transcript variant 2, mRNA.	-0.985076	6.46558	-8.57854	4.15229e-05	0.0012609	2.1317
TC0X00000652.mm.2	NM_008253	Hmgb3	high mobility group box 3	NM_008253	RefSeq	Mus musculus high mobility group box 3 (Hmgb3), transcript variant 2, mRNA.	-0.98629	7.99067	-8.33954	5.03079e-05	0.00144602	1.91947
TC1300002470.mm.2	NM_001042714	Ankdd1b	ankyrin repeat and death domain containing 1B	NM_001042714	RefSeq	Mus musculus ankyrin repeat and death domain containing 1B (Ankdd1b), mRNA.	-0.987236	5.2832	-6.9574	0.00016818	0.00350585	0.584897
TC0100001550.mm.2	NM_019993	Aldh9a1	aldehyde dehydrogenase 9, subfamily A1	NM_019993	RefSeq	Mus musculus aldehyde dehydrogenase 9, subfamily A1 (Aldh9a1), mRNA.	-0.98851	8.91943	-8.92673	3.16428e-05	0.00102933	2.4321
TC0X00002833.mm.2	NM_001007580	Fndc3c1	fibronectin type III domain containing 3C1	NM_001007580	RefSeq	Mus musculus fibronectin type III domain containing 3C1 (Fndc3c1), mRNA.	-0.988605	10.3989	-7.73622	8.33978e-05	0.00213996	1.36044
TC1300000244.mm.2	NM_153173	Hist1h4h	histone cluster 1, H4h	NM_153173	RefSeq	Mus musculus histone cluster 1, H4h (Hist1h4h), mRNA.	-0.989953	9.46151	-8.06641	6.30011e-05	0.0017132	1.67064
TC0700003437.mm.2	NM_053080	Aldh1a3	aldehyde dehydrogenase family 1, subfamily A3	NM_053080	RefSeq	Mus musculus aldehyde dehydrogenase family 1, subfamily A3 (Aldh1a3), mRNA.	-0.990942	6.78992	-9.01905	2.94875e-05	0.000970745	2.51007
TC1400001000.mm.2	NM_180588	Reep4	receptor accessory protein 4	NM_180588	RefSeq	Mus musculus receptor accessory protein 4 (Reep4), mRNA.	-0.993062	8.80909	-7.31804	0.000120658	0.00278749	0.951996
TC0900000793.mm.2	NM_001033175	Cln6	ceroid-lipofuscinosis, neuronal 6	NM_001033175	RefSeq	Mus musculus ceroid-lipofuscinosis, neuronal 6 (Cln6), mRNA.	-0.993871	8.92756	-10.5398	1.0009e-05	0.000432952	3.70255
TC1100000925.mm.2	NM_026982	Tmem256	transmembrane protein 256	NM_026982	RefSeq	Mus musculus transmembrane protein 256 (Tmem256), mRNA.	-0.996604	6.2251	-8.49052	4.45404e-05	0.00133743	2.05412
TC0300001338.mm.2	NM_001289477	Papss1	3-phosphoadenosine 5-phosphosulfate synthase 1	NM_001289477	RefSeq	Mus musculus 3-phosphoadenosine 5-phosphosulfate synthase 1 (Papss1), transcript variant 2, mRNA.	-0.998755	8.91404	-7.09709	0.000147652	0.00322217	0.728778
TC1400002182.mm.2	NM_011892	Sgcg	sarcoglycan, gamma (dystrophin-associated glycoprotein)	NM_011892	RefSeq	Mus musculus sarcoglycan, gamma (dystrophin-associated glycoprotein) (Sgcg), mRNA.	-1.00048	7.02937	-10.9407	7.70278e-06	0.000356568	3.99093
TC1100001209.mm.2	NM_029537	Tmem98	transmembrane protein 98	NM_029537	RefSeq	Mus musculus transmembrane protein 98 (Tmem98), mRNA.	-1.00102	5.94359	-7.46362	0.000105904	0.00254526	1.09622
TC1700001674.mm.2	NM_133719	Metrn	meteorin, glial cell differentiation regulator	NM_133719	RefSeq	Mus musculus meteorin, glial cell differentiation regulator (Metrn), mRNA.	-1.00182	9.86184	-8.61136	4.04571e-05	0.0012369	2.16045
TC1200000236.mm.2	NM_134052	Adi1	acireductone dioxygenase 1	NM_134052	RefSeq	Mus musculus acireductone dioxygenase 1 (Adi1), mRNA.	-1.0037	9.80559	-7.02347	0.000158098	0.00335934	0.653222
TC1200002178.mm.2	NM_008079	Galc	galactosylceramidase	NM_008079	RefSeq	Mus musculus galactosylceramidase (Galc), mRNA.	-1.00399	7.992	-7.76316	8.14814e-05	0.00210012	1.38615
TC0200001781.mm.2	NM_019392	Tyro3	TYRO3 protein tyrosine kinase 3	NM_019392	RefSeq	Mus musculus TYRO3 protein tyrosine kinase 3 (Tyro3), transcript variant 1, mRNA.	-1.00447	6.84943	-6.83964	0.00018798	0.00377864	0.461907
TC0400003422.mm.2	NM_001110129	Ppih	peptidyl prolyl isomerase H	NM_001110129	RefSeq	Mus musculus peptidyl prolyl isomerase H (Ppih), transcript variant 2, mRNA.	-1.00513	8.97206	-9.98649	1.45827e-05	0.000572012	3.28762
TC1900000247.mm.2	NM_026640	Fam111a	family with sequence similarity 111, member A	NM_026640	RefSeq	Mus musculus family with sequence similarity 111, member A (Fam111a), mRNA.	-1.0053	8.20489	-8.65947	3.89495e-05	0.00120237	2.20243
TC1000000566.mm.2	NM_153542	Lrrc20	leucine rich repeat containing 20	NM_153542	RefSeq	Mus musculus leucine rich repeat containing 20 (Lrrc20), mRNA.	-1.00567	7.35897	-9.90736	1.54121e-05	0.000591587	3.22659
TC1000002671.mm.2	NM_001080129	Tmpo	thymopoietin	NM_001080129	RefSeq	Mus musculus thymopoietin (Tmpo), transcript variant 3, mRNA.	-1.00568	9.22375	-8.67269	3.85463e-05	0.00119449	2.21394
TC1000000846.mm.2	NM_023431	Mum1	melanoma associated antigen (mutated) 1	NM_023431	RefSeq	Mus musculus melanoma associated antigen (mutated) 1 (Mum1), mRNA.	-1.00724	7.16947	-8.47244	4.51903e-05	0.00134526	2.03811
TC0500001413.mm.2	NM_029850	Bcl7a	B cell CLL/lymphoma 7A	NM_029850	RefSeq	Mus musculus B cell CLL/lymphoma 7A (Bcl7a), mRNA.	-1.00896	8.56381	-7.57847	9.56828e-05	0.0023569	1.20846
TC1300002360.mm.2	NM_001081176	Polr3g	polymerase (RNA) III (DNA directed) polypeptide G	NM_001081176	RefSeq	Mus musculus polymerase (RNA) III (DNA directed) polypeptide G (Polr3g), mRNA.	-1.00972	7.51312	-10.3018	1.17422e-05	0.000487451	3.52655
TC0500001560.mm.2	NM_020022	Rfc2	replication factor C (activator 1) 2	NM_020022	RefSeq	Mus musculus replication factor C (activator 1) 2 (Rfc2), mRNA.	-1.01146	8.43563	-9.43532	2.16145e-05	0.000761447	2.85323
TC1400001533.mm.2	NM_134081	Dnajc9	DnaJ (Hsp40) homolog, subfamily C, member 9	NM_134081	RefSeq	Mus musculus DnaJ (Hsp40) homolog, subfamily C, member 9 (Dnajc9), mRNA.	-1.01316	9.32693	-9.49684	2.06654e-05	0.000732277	2.90282
TC1700000896.mm.2	NM_207161	Dnph1	2-deoxynucleoside 5-phosphate N-hydrolase 1	NM_207161	RefSeq	Mus musculus 2-deoxynucleoside 5-phosphate N-hydrolase 1 (Dnph1), mRNA.	-1.01337	8.70391	-9.17535	2.62045e-05	0.000891985	2.6405
TC0700002291.mm.2	NM_001105076	Vmn2r46	vomeronasal 2, receptor 46	NM_001105076	RefSeq	Mus musculus vomeronasal 2, receptor 46 (Vmn2r46), mRNA.	-1.01949	4.6939	-6.61677	0.000232992	0.00441572	0.224771
TC1300000330.mm.2	NM_153546	Mboat1	membrane bound O-acyltransferase domain containing 1	NM_153546	RefSeq	Mus musculus membrane bound O-acyltransferase domain containing 1 (Mboat1), mRNA.	-1.02167	6.7995	-7.42184	0.00010992	0.00260704	1.05506
TC0300002237.mm.2	NM_172681	D930015E06Rik	RIKEN cDNA D930015E06 gene	NM_172681	RefSeq	Mus musculus RIKEN cDNA D930015E06 gene (D930015E06Rik), mRNA.	-1.02363	8.0562	-8.80049	3.48824e-05	0.00110751	2.32436
TC1000001366.mm.2	NM_027468	Cpm	carboxypeptidase M	NM_027468	RefSeq	Mus musculus carboxypeptidase M (Cpm), mRNA.	-1.02364	6.79486	-8.21785	5.55701e-05	0.00156384	1.80945
TC1100004233.mm.2	NM_007988	Fasn	fatty acid synthase	NM_007988	RefSeq	Mus musculus fatty acid synthase (Fasn), mRNA.	-1.02754	9.4609	-8.59914	4.085e-05	0.00124515	2.14976
TC0400000275.mm.2	NM_027491	Rragd	Ras-related GTP binding D	NM_027491	RefSeq	Mus musculus Ras-related GTP binding D (Rragd), mRNA.	-1.02757	9.5716	-8.84249	3.37649e-05	0.00108456	2.36035
TC1800000184.mm.2	NM_001162941	Mapre2	microtubule-associated protein, RP/EB family, member 2	NM_001162941	RefSeq	Mus musculus microtubule-associated protein, RP/EB family, member 2 (Mapre2), transcript variant 2, mRNA.	-1.02789	9.7206	-10.2146	1.24594e-05	0.000509364	3.46118
TC0100003876.mm.2	NM_029368	Tex30	testis expressed 30	NM_029368	RefSeq	Mus musculus testis expressed 30 (Tex30), mRNA.	-1.03189	8.9802	-9.34957	2.30202e-05	0.000799331	2.78364
TC1300000250.mm.2	NM_175654	Hist1h4d	histone cluster 1, H4d	NM_175654	RefSeq	Mus musculus histone cluster 1, H4d (Hist1h4d), mRNA.	-1.03263	11.3307	-8.78974	3.51749e-05	0.00111153	2.31513
TC0900000285.mm.2	NM_001195632	Arhgap32	Rho GTPase activating protein 32	NM_001195632	RefSeq	Mus musculus Rho GTPase activating protein 32 (Arhgap32), transcript variant 1, mRNA.	-1.03431	7.37694	-6.5611	0.000246034	0.00462308	0.164625
TC0100003099.mm.2	NM_054077	Prelp	proline arginine-rich end leucine-rich repeat	NM_054077	RefSeq	Mus musculus proline arginine-rich end leucine-rich repeat (Prelp), mRNA.	-1.04012	6.30578	-8.35989	4.9484e-05	0.00142743	1.93773
TC0X00002266.mm.2	NM_146234	Mmgt1	membrane magnesium transporter 1	NM_146234	RefSeq	Mus musculus membrane magnesium transporter 1 (Mmgt1), mRNA.	-1.04119	8.79952	-7.17193	0.000137818	0.00306075	0.804972
TC0300002955.mm.2	NM_008212	Hadh	hydroxyacyl-Coenzyme A dehydrogenase	NM_008212	RefSeq	Mus musculus hydroxyacyl-Coenzyme A dehydrogenase (Hadh), mRNA.	-1.04211	9.16976	-7.65107	8.97934e-05	0.00226845	1.27872
TC0900000336.mm.2	NM_021339	Cdon	cell adhesion molecule-related/down-regulated by oncogenes	NM_021339	RefSeq	Mus musculus cell adhesion molecule-related/down-regulated by oncogenes (Cdon), mRNA.	-1.0435	6.88525	-9.72985	1.7473e-05	0.000647599	3.08808
TC0500001152.mm.2	NM_016681	Chek2	checkpoint kinase 2	NM_016681	RefSeq	Mus musculus checkpoint kinase 2 (Chek2), mRNA.	-1.0443	8.19676	-9.09312	2.78775e-05	0.000935771	2.57212
TC1100002170.mm.2	NM_029938	H2afv	H2A histone family, member V	NM_029938	RefSeq	Mus musculus H2A histone family, member V (H2afv), mRNA.	-1.04653	8.24004	-8.11021	6.07434e-05	0.00166679	1.711
TC1000001554.mm.2	NM_001113211	Tmem194	transmembrane protein 194	NM_001113211	RefSeq	Mus musculus transmembrane protein 194 (Tmem194), transcript variant 1, mRNA.	-1.04667	8.90037	-8.84157	3.3789e-05	0.00108456	2.35956
TC0400000269.mm.2	NM_001122978	Casp8ap2	caspase 8 associated protein 2	NM_001122978	RefSeq	Mus musculus caspase 8 associated protein 2 (Casp8ap2), transcript variant 2, mRNA.	-1.04972	8.22123	-6.47282	0.000268416	0.00492532	0.068497
TC1700001315.mm.2	NM_010830	Msh6	mutS homolog 6 (E. coli)	NM_010830	RefSeq	Mus musculus mutS homolog 6 (E. coli) (Msh6), mRNA.	-1.05048	8.13866	-7.14081	0.000141815	0.00312617	0.773366
TC1000002944.mm.2	NM_134010	Nup107	nucleoporin 107	NM_134010	RefSeq	Mus musculus nucleoporin 107 (Nup107), mRNA.	-1.05137	8.679	-10.6547	9.27683e-06	0.000407474	3.78623
TC1000001374.mm.2	NM_001162904	Mdm1	transformed mouse 3T3 cell double minute 1	NM_001162904	RefSeq	Mus musculus transformed mouse 3T3 cell double minute 1 (Mdm1), transcript variant 3, mRNA.	-1.05161	7.66112	-9.93776	1.50873e-05	0.000583977	3.2501
TC1300000268.mm.2	NM_175658	Hist1h2aa	histone cluster 1, H2aa	NM_175658	RefSeq	Mus musculus histone cluster 1, H2aa (Hist1h2aa), mRNA.	-1.05174	7.80131	-8.48292	4.48125e-05	0.001342	2.04739
TC1900000748.mm.2	NM_001164099	Add3	adducin 3 (gamma)	NM_001164099	RefSeq	Mus musculus adducin 3 (gamma) (Add3), transcript variant 1, mRNA.	-1.05206	8.58625	-6.86569	0.000183385	0.00370784	0.48925
TC0300000725.mm.2	NM_198410	Paqr6	progestin and adipoQ receptor family member VI	NM_198410	RefSeq	Mus musculus progestin and adipoQ receptor family member VI (Paqr6), transcript variant 1, mRNA.	-1.0531	7.73704	-7.01627	0.000159164	0.00337015	0.645795
TC0800003162.mm.2	NM_172288	Nup133	nucleoporin 133	NM_172288	RefSeq	Mus musculus nucleoporin 133 (Nup133), mRNA.	-1.05602	8.79754	-11.4177	5.70287e-06	0.00028341	4.32151
TC0400001918.mm.2	NM_010244	Fv1	Friend virus susceptibility 1	NM_010244	RefSeq	Mus musculus Friend virus susceptibility 1 (Fv1), mRNA.	-1.0569	6.07569	-7.62514	9.18489e-05	0.00230117	1.25368
TC0600002518.mm.2	BC004739	Rnf26	ring finger protein 26	BC004739	GenBank	Mus musculus ring finger protein 26, mRNA (cDNA clone MGC:7865 IMAGE:3501511), complete cds.	-1.05795	8.84474	-10.0935	1.35402e-05	0.000542548	3.36945
TC0100002349.mm.2	NM_001163314	Pgap1	post-GPI attachment to proteins 1	NM_001163314	RefSeq	Mus musculus post-GPI attachment to proteins 1 (Pgap1), mRNA.	-1.06056	8.27914	-6.86708	0.000183143	0.00370783	0.490706
TC0900001786.mm.2	NM_176976	Cep295	centrosomal protein 295	NM_176976	RefSeq	Mus musculus centrosomal protein 295 (Cep295), mRNA.	-1.06179	8.17375	-10.1947	1.26301e-05	0.000515469	3.44618
TC0700002968.mm.2	NM_011131	Pold1	polymerase (DNA directed), delta 1, catalytic subunit	NM_011131	RefSeq	Mus musculus polymerase (DNA directed), delta 1, catalytic subunit (Pold1), mRNA.	-1.06498	6.90349	-10.1334	1.31732e-05	0.000529666	3.39975
TC0600002903.mm.2	NM_001167730	Rad18	RAD18 E3 ubiquitin protein ligase	NM_001167730	RefSeq	Mus musculus RAD18 E3 ubiquitin protein ligase (Rad18), transcript variant 1, mRNA.	-1.06629	9.37186	-9.40613	2.20819e-05	0.000773632	2.8296
TC0400004119.mm.2	NM_001177995	Prdm16	PR domain containing 16	NM_001177995	RefSeq	Mus musculus PR domain containing 16 (Prdm16), transcript variant 2, mRNA.	-1.06637	8.19972	-7.18751	0.000135863	0.00303617	0.820765
TC0500002642.mm.2	NM_172146	Ppat	phosphoribosyl pyrophosphate amidotransferase	NM_172146	RefSeq	Mus musculus phosphoribosyl pyrophosphate amidotransferase (Ppat), mRNA.	-1.06885	8.40108	-7.04283	0.000155273	0.00332001	0.673148
TC1100002255.mm.2	NM_026576	Etaa1	Ewing tumor-associated antigen 1	NM_026576	RefSeq	Mus musculus Ewing tumor-associated antigen 1 (Etaa1), mRNA.	-1.06919	7.50722	-8.19289	5.6724e-05	0.00158526	1.78672
TC0400000133.mm.2	NM_181401	Tmem64	transmembrane protein 64	NM_181401	RefSeq	Mus musculus transmembrane protein 64 (Tmem64), mRNA.	-1.07103	9.34165	-9.15171	2.66736e-05	0.000904137	2.6209
TC1500001927.mm.2	NM_001146174	Rangap1	RAN GTPase activating protein 1	NM_001146174	RefSeq	Mus musculus RAN GTPase activating protein 1 (Rangap1), transcript variant 2, mRNA.	-1.07103	9.116	-6.6685	0.000221562	0.00424901	0.280324
TC1000003224.mm.2	NM_010124	Eif4ebp2	eukaryotic translation initiation factor 4E binding protein 2	NM_010124	RefSeq	Mus musculus eukaryotic translation initiation factor 4E binding protein 2 (Eif4ebp2), mRNA.	-1.07195	8.76799	-7.93967	7.00833e-05	0.00185982	1.55282
TC0600002722.mm.2	NM_018815	Nup210	nucleoporin 210	NM_018815	RefSeq	Mus musculus nucleoporin 210 (Nup210), mRNA.	-1.07232	8.69539	-9.59583	1.92352e-05	0.000697947	2.98201
TC0X00000439.mm.2	NM_173376	Rbmx2	RNA binding motif protein, X-linked 2	NM_173376	RefSeq	Mus musculus RNA binding motif protein, X-linked 2 (Rbmx2), mRNA.	-1.07433	8.36246	-9.74719	1.72586e-05	0.000643299	3.10172
TC1700001870.mm.2	NM_009542	Zfp101	zinc finger protein 101	NM_009542	RefSeq	Mus musculus zinc finger protein 101 (Zfp101), mRNA.	-1.07746	7.10655	-9.66195	1.8342e-05	0.000672596	3.03451
TC0400003717.mm.2	NM_001285505	Rps6ka1	ribosomal protein S6 kinase polypeptide 1	NM_001285505	RefSeq	Mus musculus ribosomal protein S6 kinase polypeptide 1 (Rps6ka1), transcript variant 2, mRNA.	-1.07883	6.03306	-7.18151	0.000136612	0.00304166	0.814688
TC0200001798.mm.2	ENSMUST00000070420	Stard9	START domain containing 9	ENSMUST00000070420	ENSEMBL	START domain containing 9 [gene_biotype:protein_coding transcript_biotype:protein_coding]	-1.07928	9.81291	-7.04912	0.000154368	0.00331501	0.679613
TC1100003941.mm.2	NM_010655	Kpna2	karyopherin (importin) alpha 2	NM_010655	RefSeq	Mus musculus karyopherin (importin) alpha 2 (Kpna2), mRNA.	-1.08123	11.26	-10.1332	1.31749e-05	0.000529666	3.39961
TC0800003031.mm.2	NM_028071	Cotl1	coactosin-like 1 (Dictyostelium)	NM_028071	RefSeq	Mus musculus coactosin-like 1 (Dictyostelium) (Cotl1), mRNA.	-1.08281	9.13273	-7.51271	0.000101392	0.00246621	1.14437
TC0200000702.mm.2	NM_001159631	Nek6	NIMA (never in mitosis gene a)-related expressed kinase 6	NM_001159631	RefSeq	Mus musculus NIMA (never in mitosis gene a)-related expressed kinase 6 (Nek6), transcript variant 1, mRNA.	-1.08499	9.21295	-6.74777	0.000205239	0.00403837	0.364858
TC0900001563.mm.2	NM_001113514	Itga9	integrin alpha 9	NM_001113514	RefSeq	Mus musculus integrin alpha 9 (Itga9), transcript variant 2, mRNA.	-1.09013	8.05181	-7.58346	9.52642e-05	0.00235264	1.21331
TC1300001006.mm.2	NM_013500	Hapln1	hyaluronan and proteoglycan link protein 1	NM_013500	RefSeq	Mus musculus hyaluronan and proteoglycan link protein 1 (Hapln1), mRNA.	-1.09036	8.14748	-7.64384	9.03614e-05	0.00227755	1.27174
TC1100002092.mm.2	NM_001159284	Smtn	smoothelin	NM_001159284	RefSeq	Mus musculus smoothelin (Smtn), transcript variant 1, mRNA.	-1.09095	8.28956	-8.91046	3.20408e-05	0.0010367	2.41829
TC0600002562.mm.2	NM_023790	Wdr54	WD repeat domain 54	NM_023790	RefSeq	Mus musculus WD repeat domain 54 (Wdr54), mRNA.	-1.09354	7.98064	-7.51794	0.000100924	0.00245731	1.14948
TC0100003483.mm.2	NM_025569	Mgst3	microsomal glutathione S-transferase 3	NM_025569	RefSeq	Mus musculus microsomal glutathione S-transferase 3 (Mgst3), mRNA.	-1.09361	5.39156	-9.32878	2.33764e-05	0.000810538	2.76667
TC1300001645.mm.2	NM_178192	Hist1h4a	histone cluster 1, H4a	NM_178192	RefSeq	Mus musculus histone cluster 1, H4a (Hist1h4a), mRNA.	-1.09623	11.8141	-9.27237	2.43742e-05	0.000839123	2.7205
TC0800003224.mm.2	NM_178395	Zdhhc2	zinc finger, DHHC domain containing 2	NM_178395	RefSeq	Mus musculus zinc finger, DHHC domain containing 2 (Zdhhc2), mRNA.	-1.0973	7.72234	-7.75528	8.20369e-05	0.00211219	1.37863
TC1100002504.mm.2	NM_027411	Spdl1	spindle apparatus coiled-coil protein 1	NM_027411	RefSeq	Mus musculus spindle apparatus coiled-coil protein 1 (Spdl1), mRNA.	-1.09757	7.97767	-10.5378	1.00224e-05	0.000432952	3.70108
TC0800000541.mm.2	NM_001284409	Casp3	caspase 3	NM_001284409	RefSeq	Mus musculus caspase 3 (Casp3), transcript variant 1, mRNA.	-1.09898	6.93697	-7.53512	9.94045e-05	0.00242764	1.16626
TC1300000247.mm.2	NM_013548	Hist1h3f	histone cluster 1, H3f	NM_013548	RefSeq	Mus musculus histone cluster 1, H3f (Hist1h3f), mRNA.	-1.09899	8.96208	-9.51302	2.04238e-05	0.000725515	2.91581
TC1500001192.mm.2	NM_001285980	Skp2	S-phase kinase-associated protein 2 (p45)	NM_001285980	RefSeq	Mus musculus S-phase kinase-associated protein 2 (p45) (Skp2), transcript variant 3, mRNA.	-1.09992	8.89108	-7.71116	8.52254e-05	0.00217577	1.33646
TC1500001095.mm.2	NM_001014976	Espl1	extra spindle pole bodies 1, separase	NM_001014976	RefSeq	Mus musculus extra spindle pole bodies 1, separase (Espl1), mRNA.	-1.10167	7.70513	-10.1428	1.30879e-05	0.000529666	3.40691
TC1300000240.mm.2	NM_178188	Hist1h2ad	histone cluster 1, H2ad	NM_178188	RefSeq	Mus musculus histone cluster 1, H2ad (Hist1h2ad), mRNA.	-1.10366	11.2565	-10.5402	1.00063e-05	0.000432952	3.70285
TC0200001378.mm.2	NM_001165989	Ckap5	cytoskeleton associated protein 5	NM_001165989	RefSeq	Mus musculus cytoskeleton associated protein 5 (Ckap5), transcript variant 1, mRNA.	-1.10561	10.5045	-9.81761	1.64177e-05	0.000619361	3.15685
TC0500002526.mm.2	NM_001164806	Bend4	BEN domain containing 4	NM_001164806	RefSeq	Mus musculus BEN domain containing 4 (Bend4), mRNA.	-1.11041	7.28469	-8.38764	4.83844e-05	0.00140576	1.96259
TC0200001036.mm.2	NM_026115	Hat1	histone aminotransferase 1	NM_026115	RefSeq	Mus musculus histone aminotransferase 1 (Hat1), mRNA.	-1.1106	10.2985	-8.0283	6.50424e-05	0.00175429	1.63537
TC0900001419.mm.2	NM_008924	Prkar2a	protein kinase, cAMP dependent regulatory, type II alpha	NM_008924	RefSeq	Mus musculus protein kinase, cAMP dependent regulatory, type II alpha (Prkar2a), mRNA.	-1.1118	8.27596	-10.3244	1.15641e-05	0.00048171	3.5434
TC1300002197.mm.2	NM_175494	Zfp367	zinc finger protein 367	NM_175494	RefSeq	Mus musculus zinc finger protein 367 (Zfp367), mRNA.	-1.11624	9.01419	-10.474	1.04571e-05	0.000445568	3.6543
TC1500000488.mm.2	NM_009375	Tg	thyroglobulin	NM_009375	RefSeq	Mus musculus thyroglobulin (Tg), mRNA.	-1.12055	7.42978	-7.44714	0.000107468	0.00257599	1.08001
TC1300000249.mm.2	NM_178196	Hist1h2bg	histone cluster 1, H2bg	NM_178196	RefSeq	Mus musculus histone cluster 1, H2bg (Hist1h2bg), mRNA.	-1.12208	8.66869	-9.53076	2.01623e-05	0.000721846	2.93003
TC0600000841.mm.2	NM_001035228	St3gal5	ST3 beta-galactoside alpha-2,3-sialyltransferase 5	NM_001035228	RefSeq	Mus musculus ST3 beta-galactoside alpha-2,3-sialyltransferase 5 (St3gal5), transcript variant 1, mRNA.	-1.12258	8.15249	-9.6022	1.9147e-05	0.000696837	2.98708
TC0400003702.mm.2	NM_001081156	Trnp1	TMF1-regulated nuclear protein 1	NM_001081156	RefSeq	Mus musculus TMF1-regulated nuclear protein 1 (Trnp1), mRNA.	-1.12339	8.53597	-9.54442	1.99636e-05	0.000717919	2.94097
TC1600002080.mm.2	NM_030018	Tmem50b	transmembrane protein 50B	NM_030018	RefSeq	Mus musculus transmembrane protein 50B (Tmem50b), mRNA.	-1.1258	8.70349	-9.54151	2.00057e-05	0.000718366	2.93864
TC0700003581.mm.2	NM_173011	Idh2	isocitrate dehydrogenase 2 (NADP+), mitochondrial	NM_173011	RefSeq	Mus musculus isocitrate dehydrogenase 2 (NADP+), mitochondrial (Idh2), mRNA.	-1.12589	10.5314	-10.7715	8.5943e-06	0.000384472	3.87038
TC0900002307.mm.2	NM_144784	Acat1	acetyl-Coenzyme A acetyltransferase 1	NM_144784	RefSeq	Mus musculus acetyl-Coenzyme A acetyltransferase 1 (Acat1), mRNA.	-1.12928	9.70906	-9.30349	2.38179e-05	0.000824667	2.746
TC0700001264.mm.2	NM_008055	Fzd4	frizzled homolog 4 (Drosophila)	NM_008055	RefSeq	Mus musculus frizzled homolog 4 (Drosophila) (Fzd4), mRNA.	-1.13409	6.36167	-8.24876	5.41772e-05	0.00153536	1.83753
TC1500002349.mm.2	NM_183091	Tonsl	tonsoku-like, DNA repair protein	NM_183091	RefSeq	Mus musculus tonsoku-like, DNA repair protein (Tonsl), mRNA.	-1.13534	6.23454	-7.74349	8.28759e-05	0.00213126	1.36738
TC0400002467.mm.2	NM_024241	Kif24	kinesin family member 24	NM_024241	RefSeq	Mus musculus kinesin family member 24 (Kif24), mRNA.	-1.13749	7.34798	-6.84526	0.000186977	0.00377137	0.467814
TC1000002655.mm.2	NM_001033331	Gas2l3	growth arrest-specific 2 like 3	NM_001033331	RefSeq	Mus musculus growth arrest-specific 2 like 3 (Gas2l3), transcript variant 1, mRNA.	-1.13792	10.0723	-9.89608	1.55346e-05	0.000593946	3.21786
TC1300000182.mm.2	NM_001195421	Hist1h4m	histone cluster 1, H4m	NM_001195421	RefSeq	Mus musculus histone cluster 1, H4m (Hist1h4m), mRNA.	-1.13832	10.9807	-11.5725	5.18543e-06	0.000263599	4.426
TC1300001564.mm.2	OTTMUST00000001028	Hist1h4n	histone cluster 1, H4n	OTTMUST00000001028	Havana transcript	histone cluster 1, H4n[gene_biotype:protein_coding transcript_biotype:protein_coding]	-1.13832	10.9807	-11.5725	5.18543e-06	0.000263599	4.426
TC0400001129.mm.2	NM_028355	Ndc1	NDC1 transmembrane nucleoporin	NM_028355	RefSeq	Mus musculus NDC1 transmembrane nucleoporin (Ndc1), mRNA.	-1.14046	10.3149	-11.7999	4.51864e-06	0.000236199	4.57711
TC0600002098.mm.2	NM_172467	Zc3hav1l	zinc finger CCCH-type, antiviral 1-like	NM_172467	RefSeq	Mus musculus zinc finger CCCH-type, antiviral 1-like (Zc3hav1l), mRNA.	-1.1432	7.99035	-8.5919	4.10853e-05	0.00124918	2.14341
TC1300001640.mm.2	NM_178208	Hist1h4c	histone cluster 1, H4c	NM_178208	RefSeq	Mus musculus histone cluster 1, H4c (Hist1h4c), mRNA.	-1.14568	10.9177	-8.84466	3.37084e-05	0.00108456	2.3622
TC0X00003066.mm.2	NM_001193309	Morc4	microrchidia 4	NM_001193309	RefSeq	Mus musculus microrchidia 4 (Morc4), transcript variant A, mRNA.	-1.14618	7.86765	-6.55336	0.00024791	0.00464749	0.156241
TC0300002504.mm.2	NM_033596	Hist2h4	histone cluster 2, H4	NM_033596	RefSeq	Mus musculus histone cluster 2, H4 (Hist2h4), mRNA.	-1.14685	10.5592	-10.9005	7.90489e-06	0.000362338	3.96243
TC0900001344.mm.2	NM_027354	Poc1a	POC1 centriolar protein homolog A (Chlamydomonas)	NM_027354	RefSeq	Mus musculus POC1 centriolar protein homolog A (Chlamydomonas) (Poc1a), mRNA.	-1.15078	6.93713	-10.0507	1.39469e-05	0.000553348	3.33681
TC1700002492.mm.2	NM_028887	Smchd1	SMC hinge domain containing 1	NM_028887	RefSeq	Mus musculus SMC hinge domain containing 1 (Smchd1), mRNA.	-1.15478	7.44935	-6.87521	0.000181738	0.00369306	0.499218
TC0400002977.mm.2	NM_173400	Haus6	HAUS augmin-like complex, subunit 6	NM_173400	RefSeq	Mus musculus HAUS augmin-like complex, subunit 6 (Haus6), mRNA.	-1.15571	8.94892	-8.71653	3.7243e-05	0.00116304	2.25197
TC1200000415.mm.2	NM_001015099	G2e3	G2/M-phase specific E3 ubiquitin ligase	NM_001015099	RefSeq	Mus musculus G2/M-phase specific E3 ubiquitin ligase (G2e3), transcript variant 1, mRNA.	-1.15805	8.21282	-6.69304	0.000216359	0.00418906	0.306574
TC0300001194.mm.2	NM_001289568	Sass6	spindle assembly 6 homolog (C. elegans)	NM_001289568	RefSeq	Mus musculus spindle assembly 6 homolog (C. elegans) (Sass6), transcript variant 3, mRNA.	-1.1588	8.5413	-8.2252	5.52351e-05	0.00155623	1.81614
TC1700002346.mm.2	NM_025877	Slc25a23	solute carrier family 25 (mitochondrial carrier; phosphate carrier), member 23	NM_025877	RefSeq	Mus musculus solute carrier family 25 (mitochondrial carrier; phosphate carrier), member 23 (Slc25a23), mRNA.	-1.15936	8.53398	-7.00182	0.000161326	0.00340402	0.630882
TC0200005010.mm.2	NM_025853	Dsn1	DSN1, MIND kinetochore complex component, homolog (S. cerevisiae)	NM_025853	RefSeq	Mus musculus DSN1, MIND kinetochore complex component, homolog (S. cerevisiae) (Dsn1), mRNA.	-1.16017	7.34992	-8.06744	6.2947e-05	0.0017132	1.67159
TC0300000714.mm.2	NM_001033484	Iqgap3	IQ motif containing GTPase activating protein 3	NM_001033484	RefSeq	Mus musculus IQ motif containing GTPase activating protein 3 (Iqgap3), mRNA.	-1.16429	9.10592	-10.8272	8.28838e-06	0.000374245	3.91029
TC0800003037.mm.2	NM_178856	Gins2	GINS complex subunit 2 (Psf2 homolog)	NM_178856	RefSeq	Mus musculus GINS complex subunit 2 (Psf2 homolog) (Gins2), mRNA.	-1.16551	7.41254	-7.9005	7.24494e-05	0.00191422	1.51609
TC1600000447.mm.2	NM_011638	Tfrc	transferrin receptor	NM_011638	RefSeq	Mus musculus transferrin receptor (Tfrc), mRNA.	-1.16561	9.76338	-10.8398	8.22095e-06	0.000371894	3.91928
TC0900001883.mm.2	NM_026282	Spc24	SPC24, NDC80 kinetochore complex component, homolog (S. cerevisiae)	NM_026282	RefSeq	Mus musculus SPC24, NDC80 kinetochore complex component, homolog (S. cerevisiae) (Spc24), mRNA.	-1.17275	7.1813	-11.3126	6.08745e-06	0.000296436	4.24979
TC0200004528.mm.2	NM_001081091	Cep152	centrosomal protein 152	NM_001081091	RefSeq	Mus musculus centrosomal protein 152 (Cep152), mRNA.	-1.17962	6.8073	-9.02161	2.94303e-05	0.000970745	2.51222
TC0100002481.mm.2	NM_001111320	Idh1	isocitrate dehydrogenase 1 (NADP+), soluble	NM_001111320	RefSeq	Mus musculus isocitrate dehydrogenase 1 (NADP+), soluble (Idh1), transcript variant 1, mRNA.	-1.17972	9.24685	-11.3034	6.12247e-06	0.000297542	4.24348
TC0600001729.mm.2	NM_010656	Sspn	sarcospan	NM_010656	RefSeq	Mus musculus sarcospan (Sspn), transcript variant 1, mRNA.	-1.18039	8.1596	-6.50122	0.000260978	0.00483999	0.0995206
TC0900001568.mm.2	NM_133710	Ctdspl	CTD (carboxy-terminal domain, RNA polymerase II, polypeptide A) small phosphatase-like	NM_133710	RefSeq	Mus musculus CTD (carboxy-terminal domain, RNA polymerase II, polypeptide A) small phosphatase-like (Ctdspl), mRNA.	-1.18337	8.08849	-7.06169	0.000152576	0.00328597	0.692518
TC0800003160.mm.2	NM_028536	Ccsap	centriole, cilia and spindle associated protein	NM_028536	RefSeq	Mus musculus centriole, cilia and spindle associated protein (Ccsap), mRNA.	-1.18558	6.65941	-6.82049	0.000191439	0.00383545	0.441756
TC0700002749.mm.2	NM_146186	Wdr62	WD repeat domain 62	NM_146186	RefSeq	Mus musculus WD repeat domain 62 (Wdr62), mRNA.	-1.18796	6.52974	-7.76845	8.11113e-05	0.00209281	1.39118
TC0400001555.mm.2	NM_011520	Sdc3	syndecan 3	NM_011520	RefSeq	Mus musculus syndecan 3 (Sdc3), mRNA.	-1.18907	8.86462	-8.65458	3.90999e-05	0.00120394	2.19817
TC0200001843.mm.2	NM_146126	Sord	sorbitol dehydrogenase	NM_146126	RefSeq	Mus musculus sorbitol dehydrogenase (Sord), mRNA.	-1.19453	9.73176	-11.9244	4.19484e-06	0.000225108	4.65869
TC1200001324.mm.2	NM_146040	Cdca7l	cell division cycle associated 7 like	NM_146040	RefSeq	Mus musculus cell division cycle associated 7 like (Cdca7l), mRNA.	-1.1947	10.0566	-9.19942	2.57364e-05	0.000879762	2.66042
TC1400000179.mm.2	NM_001243041	Adk	adenosine kinase	NM_001243041	RefSeq	Mus musculus adenosine kinase (Adk), transcript variant 2, mRNA.	-1.19616	8.87821	-7.53824	9.91316e-05	0.00242587	1.1693
TC1100002052.mm.2	NM_001038653	Slc16a3	solute carrier family 16 (monocarboxylic acid transporters), member 3	NM_001038653	RefSeq	Mus musculus solute carrier family 16 (monocarboxylic acid transporters), member 3 (Slc16a3), mRNA.	-1.20033	9.00662	-7.39995	0.000112092	0.00264154	1.03341
TC1000001840.mm.2	NM_001198914	Myb	myeloblastosis oncogene	NM_001198914	RefSeq	Mus musculus myeloblastosis oncogene (Myb), transcript variant 1, mRNA.	-1.20099	5.62776	-10.2656	1.20344e-05	0.000496055	3.49945
TC1300002311.mm.2	NM_028959	Cep72	centrosomal protein 72	NM_028959	RefSeq	Mus musculus centrosomal protein 72 (Cep72), mRNA.	-1.20163	6.08086	-12.4329	3.11852e-06	0.000177461	4.98363
TC0900001050.mm.2	NM_001122660	Gm10639	predicted gene 10639	NM_001122660	RefSeq	Mus musculus predicted gene 10639 (Gm10639), mRNA.	-1.2019	7.35005	-6.75435	0.000203947	0.00403262	0.371834
TC1100004115.mm.2	NM_008240	Foxj1	forkhead box J1	NM_008240	RefSeq	Mus musculus forkhead box J1 (Foxj1), mRNA.	-1.20292	6.42077	-8.70894	3.74651e-05	0.00116546	2.24539
TC1300000746.mm.2	NM_001039239	Zfp808	zinc finger protein 80	NM_001039239	RefSeq	Mus musculus zinc finger protein 80 (Zfp808), mRNA.	-1.20406	4.71572	-7.59611	9.42132e-05	0.00234101	1.22558
TC1100002897.mm.2	NM_009171	Shmt1	serine hydroxymethyltransferase 1 (soluble)	NM_009171	RefSeq	Mus musculus serine hydroxymethyltransferase 1 (soluble) (Shmt1), mRNA.	-1.20695	7.11887	-7.29762	0.000122906	0.00282217	0.931581
TC0X00002739.mm.2	NM_001276466	Cited1	Cbp/p300-interacting transactivator with Glu/Asp-rich carboxy-terminal domain 1	NM_001276466	RefSeq	Mus musculus Cbp/p300-interacting transactivator with Glu/Asp-rich carboxy-terminal domain 1 (Cited1), transcript variant 2, mRNA.	-1.20963	8.13286	-7.78068	8.02619e-05	0.00207976	1.40283
TC1600001081.mm.2	NM_001122993	B3galt5	UDP-Gal:betaGlcNAc beta 1,3-galactosyltransferase, polypeptide 5	NM_001122993	RefSeq	Mus musculus UDP-Gal:betaGlcNAc beta 1,3-galactosyltransferase, polypeptide 5 (B3galt5), transcript variant 2, mRNA.	-1.21249	5.56674	-7.4869	0.000103737	0.00250313	1.11908
TC0100001114.mm.2	NM_145128	Mgat5	mannoside acetylglucosaminyltransferase 5	NM_145128	RefSeq	Mus musculus mannoside acetylglucosaminyltransferase 5 (Mgat5), mRNA.	-1.2129	11.2377	-10.4151	1.08783e-05	0.00045947	3.61078
TC0700002224.mm.2	NM_001113468	Vmn2r29	vomeronasal 2, receptor 29	NM_001113468	RefSeq	Mus musculus vomeronasal 2, receptor 29 (Vmn2r29), transcript variant 1, mRNA.	-1.21394	7.68917	-7.94324	6.98723e-05	0.00185626	1.55615
TC0400001596.mm.2	NM_011284	Rpa2	replication protein A2	NM_011284	RefSeq	Mus musculus replication protein A2 (Rpa2), mRNA.	-1.2141	7.88884	-11.0188	7.32714e-06	0.000341679	4.04595
TC1200000528.mm.2	NM_178912	Fancm	Fanconi anemia, complementation group M	NM_178912	RefSeq	Mus musculus Fanconi anemia, complementation group M (Fancm), mRNA.	-1.21417	7.36209	-8.64935	3.92614e-05	0.00120738	2.19362
TC1100001899.mm.2	NM_001002929	Nup85	nucleoporin 85	NM_001002929	RefSeq	Mus musculus nucleoporin 85 (Nup85), mRNA.	-1.21656	7.28935	-11.8781	4.31216e-06	0.000228866	4.62843
TC0700000161.mm.2	NM_001083188	Lig1	ligase I, DNA, ATP-dependent	NM_001083188	RefSeq	Mus musculus ligase I, DNA, ATP-dependent (Lig1), transcript variant 1, mRNA.	-1.22068	7.21364	-12.2117	3.54289e-06	0.000197115	4.84388
TC0200001012.mm.2	NM_177784	Klhl23	kelch-like 23	NM_177784	RefSeq	Mus musculus kelch-like 23 (Klhl23), mRNA.	-1.22522	6.33421	-8.41813	4.72076e-05	0.00138706	1.98981
TC0800000765.mm.2	NM_001166399	Rab3a	RAB3A, member RAS oncogene family	NM_001166399	RefSeq	Mus musculus RAB3A, member RAS oncogene family (Rab3a), transcript variant 1, mRNA.	-1.23204	7.85498	-6.62509	0.00023111	0.00439727	0.233729
TC0500000260.mm.2	NM_153526	Insig1	insulin induced gene 1	NM_153526	RefSeq	Mus musculus insulin induced gene 1 (Insig1), mRNA.	-1.23746	10.4799	-9.11448	2.74317e-05	0.000924654	2.58993
TC1600001135.mm.2	NM_026393	Nmral1	NmrA-like family domain containing 1	NM_026393	RefSeq	Mus musculus NmrA-like family domain containing 1 (Nmral1), transcript variant 1, mRNA.	-1.24264	6.094	-7.59238	9.45216e-05	0.00234627	1.22196
TC1700001757.mm.2	NM_010220	Fkbp5	FK506 binding protein 5	NM_010220	RefSeq	Mus musculus FK506 binding protein 5 (Fkbp5), mRNA.	-1.24347	9.33192	-12.4317	3.12074e-06	0.000177461	4.98285
TC0300000308.mm.2	NM_011495	Plk4	polo-like kinase 4	NM_011495	RefSeq	Mus musculus polo-like kinase 4 (Plk4), transcript variant 1, mRNA.	-1.24824	7.30324	-8.15073	5.8735e-05	0.0016283	1.74819
TC0900001386.mm.2	NM_011634	Traip	TRAF-interacting protein	NM_011634	RefSeq	Mus musculus TRAF-interacting protein (Traip), mRNA.	-1.24887	5.80952	-8.41175	4.74513e-05	0.00139033	1.98412
TC0700002311.mm.2	NM_009577	Zik1	zinc finger protein interacting with K protein 1	NM_009577	RefSeq	Mus musculus zinc finger protein interacting with K protein 1 (Zik1), mRNA.	-1.24893	6.733	-9.91931	1.52835e-05	0.000588063	3.23584
TC0100001836.mm.2	NM_198654	Nsl1	NSL1, MIND kinetochore complex component, homolog (S. cerevisiae)	NM_198654	RefSeq	Mus musculus NSL1, MIND kinetochore complex component, homolog (S. cerevisiae) (Nsl1), mRNA.	-1.25047	7.66279	-9.51379	2.04123e-05	0.000725515	2.91642
TC0500001066.mm.2	NM_001271566	Cdc7	cell division cycle 7 (S. cerevisiae)	NM_001271566	RefSeq	Mus musculus cell division cycle 7 (S. cerevisiae) (Cdc7), transcript variant 1, mRNA.	-1.25566	8.94825	-8.15111	5.87167e-05	0.0016283	1.74854
TC0800002618.mm.2	NM_001081324	Neto2	neuropilin (NRP) and tolloid (TLL)-like 2	NM_001081324	RefSeq	Mus musculus neuropilin (NRP) and tolloid (TLL)-like 2 (Neto2), mRNA.	-1.26661	8.64218	-10.8597	8.11582e-06	0.000369209	3.93345
TC1700001458.mm.2	NM_153151	Acat3	acetyl-Coenzyme A acetyltransferase 3	NM_153151	RefSeq	Mus musculus acetyl-Coenzyme A acetyltransferase 3 (Acat3), mRNA.	-1.26686	7.06435	-10.0623	1.38345e-05	0.000550696	3.34573
TC0700001624.mm.2	NM_009516	Wee1	WEE 1 homolog 1 (S. pombe)	NM_009516	RefSeq	Mus musculus WEE 1 homolog 1 (S. pombe) (Wee1), mRNA.	-1.27113	9.60464	-13.3717	1.85547e-06	0.000121368	5.55105
TC1500000804.mm.2	NM_010180	Fbln1	fibulin 1	NM_010180	RefSeq	Mus musculus fibulin 1 (Fbln1), mRNA.	-1.27661	9.07562	-10.8832	7.99373e-06	0.000365717	3.95013
TC1100003156.mm.2	NM_010353	Gsg2	germ cell-specific gene 2	NM_010353	RefSeq	Mus musculus germ cell-specific gene 2 (Gsg2), mRNA.	-1.27846	7.06222	-9.42898	2.17151e-05	0.000763879	2.8481
TC0800002154.mm.2	NM_207213	Snx25	sorting nexin 25	NM_207213	RefSeq	Mus musculus sorting nexin 25 (Snx25), mRNA.	-1.28067	7.8547	-8.8262	3.41936e-05	0.0010932	2.34641
TC0400003897.mm.2	NM_145402	Tmem51	transmembrane protein 51	NM_145402	RefSeq	Mus musculus transmembrane protein 51 (Tmem51), mRNA.	-1.28255	7.34607	-11.9797	4.05954e-06	0.000220446	4.69465
TC1300000261.mm.2	NM_178193	Hist1h4b	histone cluster 1, H4b	NM_178193	RefSeq	Mus musculus histone cluster 1, H4b (Hist1h4b), mRNA.	-1.28449	10.9696	-10.9366	7.72339e-06	0.000356568	3.98799
TC0X00001793.mm.2	NM_011514	Suv39h1	suppressor of variegation 3-9 homolog 1 (Drosophila)	NM_011514	RefSeq	Mus musculus suppressor of variegation 3-9 homolog 1 (Drosophila) (Suv39h1), transcript variant 1, mRNA.	-1.28956	8.73509	-10.6702	9.18298e-06	0.000404085	3.79743
TC1100003478.mm.2	NM_053269	Rad51c	RAD51 homolog C	NM_053269	RefSeq	Mus musculus RAD51 homolog C (Rad51c), transcript variant 2, mRNA.	-1.29237	8.48034	-7.73523	8.34691e-05	0.00213996	1.35949
TC1400002515.mm.2	NM_019670	Diaph3	diaphanous related formin 3	NM_019670	RefSeq	Mus musculus diaphanous related formin 3 (Diaph3), mRNA.	-1.2933	8.77755	-12.0004	4.01003e-06	0.000218583	4.70811
TC1300000173.mm.2	NM_178182	Hist1h2ai	histone cluster 1, H2ai	NM_178182	RefSeq	Mus musculus histone cluster 1, H2ai (Hist1h2ai), mRNA.	-1.29414	10.951	-10.5388	1.00158e-05	0.000432952	3.70181
TC1000002520.mm.2	NM_001038655	Gng7	guanine nucleotide binding protein (G protein), gamma 7	NM_001038655	RefSeq	Mus musculus guanine nucleotide binding protein (G protein), gamma 7 (Gng7), transcript variant 1, mRNA.	-1.29449	7.67419	-7.25107	0.000128207	0.00290532	0.884889
TC0500001931.mm.2	NM_001190717	Dbf4	DBF4 homolog (S. cerevisiae)	NM_001190717	RefSeq	Mus musculus DBF4 homolog (S. cerevisiae) (Dbf4), transcript variant 2, mRNA.	-1.30149	8.40827	-9.74351	1.73038e-05	0.000643299	3.09882
TC1000001809.mm.2	NM_001033258	Arfgef3	ARFGEF family member 3	NM_001033258	RefSeq	Mus musculus ARFGEF family member 3 (Arfgef3), mRNA.	-1.30512	9.52526	-8.3685	4.91397e-05	0.00141919	1.94546
TC1200001077.mm.2	NM_001029843	Vrk1	vaccinia related kinase 1	NM_001029843	RefSeq	Mus musculus vaccinia related kinase 1 (Vrk1), transcript variant 2, mRNA.	-1.30793	9.16911	-10.8175	8.34074e-06	0.000375622	3.90335
TC0900002274.mm.2	NM_178118	Dixdc1	DIX domain containing 1	NM_178118	RefSeq	Mus musculus DIX domain containing 1 (Dixdc1), transcript variant 1, mRNA.	-1.31088	5.59772	-9.51161	2.04446e-05	0.000725515	2.91468
TC0600002613.mm.2	NM_001163427	Pradc1	protease-associated domain containing 1	NM_001163427	RefSeq	Mus musculus protease-associated domain containing 1 (Pradc1), transcript variant 2, mRNA.	-1.31127	7.17002	-11.0509	7.17894e-06	0.000335415	4.06843
TC1300001670.mm.2	NM_172532	Aldh5a1	aldhehyde dehydrogenase family 5, subfamily A1	NM_172532	RefSeq	Mus musculus aldhehyde dehydrogenase family 5, subfamily A1 (Aldh5a1), mRNA.	-1.31813	6.32375	-9.86511	1.58766e-05	0.000604159	3.19383
TC1700001459.mm.2	NM_009338	Acat2	acetyl-Coenzyme A acetyltransferase 2	NM_009338	RefSeq	Mus musculus acetyl-Coenzyme A acetyltransferase 2 (Acat2), mRNA.	-1.32173	8.75299	-9.69648	1.78941e-05	0.000658166	3.0618
TC0600001074.mm.2	NM_023184	Klf15	Kruppel-like factor 15	NM_023184	RefSeq	Mus musculus Kruppel-like factor 15 (Klf15), mRNA.	-1.32616	5.90669	-7.04599	0.000154819	0.0033188	0.676388
TC1200002497.mm.2	NR_028421	D430020J02Rik	RIKEN cDNA D430020J02 gene	NR_028421	RefSeq	Mus musculus RIKEN cDNA D430020J02 gene (D430020J02Rik), long non-coding RNA.	-1.32693	7.0697	-8.16122	5.82275e-05	0.00161991	1.75779
TC0100002772.mm.2	NM_172505	A730008H23Rik	RIKEN cDNA A730008H23 gene	NM_172505	RefSeq	Mus musculus RIKEN cDNA A730008H23 gene (A730008H23Rik), mRNA.	-1.33348	10.0972	-12.6501	2.75686e-06	0.00016234	5.11853
TC0500002110.mm.2	NM_020570	Xrcc2	X-ray repair complementing defective repair in Chinese hamster cells 2	NM_020570	RefSeq	Mus musculus X-ray repair complementing defective repair in Chinese hamster cells 2 (Xrcc2), mRNA.	-1.33475	6.24409	-10.9431	7.69103e-06	0.000356568	3.99261
TC1900000993.mm.2	NM_001164057	Pola2	polymerase (DNA directed), alpha 2	NM_001164057	RefSeq	Mus musculus polymerase (DNA directed), alpha 2 (Pola2), transcript variant 2, mRNA.	-1.33869	8.45518	-11.3766	5.85015e-06	0.000287648	4.29349
TC0700003769.mm.2	NM_175105	Aqp11	aquaporin 11	NM_175105	RefSeq	Mus musculus aquaporin 11 (Aqp11), mRNA.	-1.33905	6.01084	-7.18823	0.000135775	0.00303617	0.821486
TC0100000372.mm.2	NM_138741	Sdpr	serum deprivation response	NM_138741	RefSeq	Mus musculus serum deprivation response (Sdpr), mRNA.	-1.34181	7.03798	-7.41788	0.00011031	0.00261224	1.05114
TC0200001628.mm.2	NM_026613	Ccdc34	coiled-coil domain containing 34	NM_026613	RefSeq	Mus musculus coiled-coil domain containing 34 (Ccdc34), mRNA.	-1.34195	9.38944	-9.40391	2.21179e-05	0.000773632	2.8278
TC1300001562.mm.2	NM_178184	Hist1h2an	histone cluster 1, H2an	NM_178184	RefSeq	Mus musculus histone cluster 1, H2an (Hist1h2an), mRNA.	-1.34436	11.2386	-10.5532	9.92038e-06	0.0004326	3.71235
TC0900000966.mm.2	NM_008613	Mns1	meiosis-specific nuclear structural protein 1	NM_008613	RefSeq	Mus musculus meiosis-specific nuclear structural protein 1 (Mns1), mRNA.	-1.34519	7.75972	-7.5365	9.92835e-05	0.00242713	1.1676
TC1100001730.mm.2	NM_016780	Itgb3	integrin beta 3	NM_016780	RefSeq	Mus musculus integrin beta 3 (Itgb3), mRNA.	-1.34659	6.87649	-13.3319	1.89543e-06	0.000123315	5.52781
TC0100002136.mm.2	NM_008922	Prim2	DNA primase, p58 subunit	NM_008922	RefSeq	Mus musculus DNA primase, p58 subunit (Prim2), mRNA.	-1.34846	9.28185	-9.74389	1.72991e-05	0.000643299	3.09912
TC0800001493.mm.2	NM_026014	Cdt1	chromatin licensing and DNA replication factor 1	NM_026014	RefSeq	Mus musculus chromatin licensing and DNA replication factor 1 (Cdt1), mRNA.	-1.35172	8.94019	-11.8476	4.39139e-06	0.000232053	4.60846
TC0300000880.mm.2	NM_009150	Selenbp1	selenium binding protein 1	NM_009150	RefSeq	Mus musculus selenium binding protein 1 (Selenbp1), mRNA.	-1.35422	6.13793	-7.0874	0.000148983	0.0032338	0.718861
TC0600001035.mm.2	NM_001166249	Mgll	monoglyceride lipase	NM_001166249	RefSeq	Mus musculus monoglyceride lipase (Mgll), transcript variant 3, mRNA.	-1.35582	7.13791	-7.14067	0.000141834	0.00312617	0.773219
TC1700002167.mm.2	NM_030715	Polh	polymerase (DNA directed), eta (RAD 30 related)	NM_030715	RefSeq	Mus musculus polymerase (DNA directed), eta (RAD 30 related) (Polh), mRNA.	-1.35757	8.65229	-9.8835	1.56725e-05	0.00059733	3.20811
TC0900002719.mm.2	NM_008182	Gsta2	glutathione S-transferase, alpha 2 (Yc2)	NM_008182	RefSeq	Mus musculus glutathione S-transferase, alpha 2 (Yc2) (Gsta2), mRNA.	-1.36135	10.1432	-8.3073	5.16456e-05	0.00147571	1.89045
TC1100003857.mm.2	NM_197959	Kif18b	kinesin family member 18B	NM_197959	RefSeq	Mus musculus kinesin family member 18B (Kif18b), mRNA.	-1.36135	7.32017	-12.7212	2.64893e-06	0.000158295	5.16222
TC0100003026.mm.2	NM_008567	Mcm6	minichromosome maintenance deficient 6 (MIS5 homolog, S. pombe) (S. cerevisiae)	NM_008567	RefSeq	Mus musculus minichromosome maintenance deficient 6 (MIS5 homolog, S. pombe) (S. cerevisiae) (Mcm6), transcript variant 1, mRNA.	-1.3663	10.6659	-14.1193	1.25653e-06	9.07777e-05	5.97547
TC0100003697.mm.2	NM_133815	Lbr	lamin B receptor	NM_133815	RefSeq	Mus musculus lamin B receptor (Lbr), mRNA.	-1.36719	9.64864	-10.0283	1.41649e-05	0.000561079	3.31969
TC0100003021.mm.2	NM_001285945	Zranb3	zinc finger, RAN-binding domain containing 3	NM_001285945	RefSeq	Mus musculus zinc finger, RAN-binding domain containing 3 (Zranb3), transcript variant 2, mRNA.	-1.36867	8.01897	-11.9664	4.0915e-06	0.000221527	4.68605
TC1100003434.mm.2	NM_178309	Brip1	BRCA1 interacting protein C-terminal helicase 1	NM_178309	RefSeq	Mus musculus BRCA1 interacting protein C-terminal helicase 1 (Brip1), mRNA.	-1.37029	9.62022	-10.694	9.04051e-06	0.00039854	3.81465
TC1000000647.mm.2	NM_001081346	Rtkn2	rhotekin 2	NM_001081346	RefSeq	Mus musculus rhotekin 2 (Rtkn2), mRNA.	-1.37047	6.30255	-9.23282	2.51025e-05	0.000861744	2.68797
TC0900001695.mm.2	NM_001113180	Gria4	glutamate receptor, ionotropic, AMPA4 (alpha 4)	NM_001113180	RefSeq	Mus musculus glutamate receptor, ionotropic, AMPA4 (alpha 4) (Gria4), transcript variant 2, mRNA.	-1.37451	7.16002	-7.02795	0.00015744	0.0033483	0.657831
TC0300000548.mm.2	NM_001039543	Mlf1	myeloid leukemia factor 1	NM_001039543	RefSeq	Mus musculus myeloid leukemia factor 1 (Mlf1), transcript variant 1, mRNA.	-1.37499	5.78228	-9.52035	2.03153e-05	0.000724109	2.92169
TC0600001606.mm.2	NM_001288627	Emp1	epithelial membrane protein 1	NM_001288627	RefSeq	Mus musculus epithelial membrane protein 1 (Emp1), transcript variant 2, mRNA.	-1.37797	8.17899	-8.92385	3.17129e-05	0.00103022	2.42966
TC1100003792.mm.2	NM_008949	Psmc3ip	proteasome (prosome, macropain) 26S subunit, ATPase 3, interacting protein	NM_008949	RefSeq	Mus musculus proteasome (prosome, macropain) 26S subunit, ATPase 3, interacting protein (Psmc3ip), mRNA.	-1.38446	6.98652	-8.75865	3.6037e-05	0.00113122	2.28836
TC0300002501.mm.2	NM_013549	Hist2h2aa1	histone cluster 2, H2aa1	NM_013549	RefSeq	Mus musculus histone cluster 2, H2aa1 (Hist2h2aa1), mRNA.	-1.38866	11.1941	-10.2827	1.18951e-05	0.000491907	3.51228
TC0300003215.mm.2	NM_178212	Hist2h2aa2	histone cluster 2, H2aa2	NM_178212	RefSeq	Mus musculus histone cluster 2, H2aa2 (Hist2h2aa2), mRNA.	-1.38866	11.1941	-10.2827	1.18951e-05	0.000491907	3.51228
TC0400003343.mm.2	NM_001081475	Nasp	nuclear autoantigenic sperm protein (histone-binding)	NM_001081475	RefSeq	Mus musculus nuclear autoantigenic sperm protein (histone-binding) (Nasp), transcript variant 1, mRNA.	-1.40082	8.79454	-11.2389	6.37456e-06	0.000307939	4.19912
TC1300001633.mm.2	NM_178205	Hist1h3e	histone cluster 1, H3e	NM_178205	RefSeq	Mus musculus histone cluster 1, H3e (Hist1h3e), mRNA.	-1.40163	10.5345	-10.4021	1.09732e-05	0.000461865	3.60121
TC1200001544.mm.2	NM_010496	Id2	inhibitor of DNA binding 2	NM_010496	RefSeq	Mus musculus inhibitor of DNA binding 2 (Id2), mRNA.	-1.40168	10.6581	-11.4094	5.73252e-06	0.00028357	4.31581
TC1600001390.mm.2	NM_145480	Rfc4	replication factor C (activator 1) 4	NM_145480	RefSeq	Mus musculus replication factor C (activator 1) 4 (Rfc4), mRNA.	-1.40266	9.40063	-13.7062	1.55469e-06	0.00010599	5.74381
TC0600003136.mm.2	NM_146171	Ncapd2	non-SMC condensin I complex, subunit D2	NM_146171	RefSeq	Mus musculus non-SMC condensin I complex, subunit D2 (Ncapd2), mRNA.	-1.40676	7.63833	-11.5643	5.21149e-06	0.000263599	4.4205
TC1500001657.mm.2	NM_008681	Ndrg1	N-myc downstream regulated gene 1	NM_008681	RefSeq	Mus musculus N-myc downstream regulated gene 1 (Ndrg1), mRNA.	-1.40734	9.79985	-11.2238	6.43553e-06	0.000309647	4.18866
TC1100002030.mm.2	NM_013770	Slc25a10	solute carrier family 25 (mitochondrial carrier, dicarboxylate transporter), member 10	NM_013770	RefSeq	Mus musculus solute carrier family 25 (mitochondrial carrier, dicarboxylate transporter), member 10 (Slc25a10), mRNA.	-1.41111	9.56736	-13.1045	2.14339e-06	0.000136871	5.39363
TC1300002463.mm.2	NM_027711	Iqgap2	IQ motif containing GTPase activating protein 2	NM_027711	RefSeq	Mus musculus IQ motif containing GTPase activating protein 2 (Iqgap2), mRNA.	-1.41278	7.24057	-12.6407	2.77146e-06	0.000162803	5.11276
TC0100003258.mm.2	NM_197990	1700025G04Rik	RIKEN cDNA 1700025G04 gene	NM_197990	RefSeq	Mus musculus RIKEN cDNA 1700025G04 gene (1700025G04Rik), mRNA.	-1.4128	8.62232	-11.5147	5.37228e-06	0.000270142	4.38712
TC0500003131.mm.2	NM_028128	Rfc5	replication factor C (activator 1) 5	NM_028128	RefSeq	Mus musculus replication factor C (activator 1) 5 (Rfc5), mRNA.	-1.41815	7.67456	-10.0227	1.422e-05	0.000562341	3.31541
TC0300001398.mm.2	NM_016750	H2afz	H2A histone family, member Z	NM_016750	RefSeq	Mus musculus H2A histone family, member Z (H2afz), mRNA.	-1.41972	11.3303	-9.19139	2.58916e-05	0.00088382	2.65378
TC0100003416.mm.2	NM_201364	BC055324	cDNA sequence BC055324	NM_201364	RefSeq	Mus musculus cDNA sequence BC055324 (BC055324), mRNA.	-1.41995	7.3254	-12.3026	3.36112e-06	0.000189618	4.90159
TC1700001881.mm.2	NM_001195298	Kifc1	kinesin family member C1	NM_001195298	RefSeq	Mus musculus kinesin family member C1 (Kifc1), mRNA.	-1.42292	7.7915	-13.3409	1.88633e-06	0.000123054	5.53306
TC0300002352.mm.2	NM_016904	Cks1b	CDC28 protein kinase 1b	NM_016904	RefSeq	Mus musculus CDC28 protein kinase 1b (Cks1b), mRNA.	-1.42355	8.63267	-12.5058	2.99151e-06	0.000172382	5.02915
TC0300000934.mm.2	NM_178215	Hist2h3b	histone cluster 2, H3b	NM_178215	RefSeq	Mus musculus histone cluster 2, H3b (Hist2h3b), mRNA.	-1.43326	11.244	-11.8279	4.4434e-06	0.000232769	4.59554
TC0900000505.mm.2	NM_010436	H2afx	H2A histone family, member X	NM_010436	RefSeq	Mus musculus H2A histone family, member X (H2afx), mRNA.	-1.43705	10.3775	-13.0046	2.26382e-06	0.000141573	5.33393
TC0900001851.mm.2	NM_001199431	Dnmt1	DNA methyltransferase (cytosine-5) 1	NM_001199431	RefSeq	Mus musculus DNA methyltransferase (cytosine-5) 1 (Dnmt1), transcript variant 1, mRNA.	-1.44057	9.04431	-9.93154	1.51532e-05	0.000583977	3.24529
TC0300002500.mm.2	NM_054045	Hist2h3c2	histone cluster 2, H3c2	NM_054045	RefSeq	Mus musculus histone cluster 2, H3c2 (Hist2h3c2), mRNA.	-1.44299	11.2333	-10.9328	7.74214e-06	0.000356568	3.98533
TC0300003216.mm.2	NM_178216	Hist2h3c1	histone cluster 2, H3c1	NM_178216	RefSeq	Mus musculus histone cluster 2, H3c1 (Hist2h3c1), mRNA.	-1.44299	11.2333	-10.9328	7.74214e-06	0.000356568	3.98533
TC0100003371.mm.2	NM_172644	Dars2	aspartyl-tRNA synthetase 2 (mitochondrial)	NM_172644	RefSeq	Mus musculus aspartyl-tRNA synthetase 2 (mitochondrial) (Dars2), mRNA.	-1.44529	7.22045	-10.1339	1.31687e-05	0.000529666	3.40013
TC0900000255.mm.2	NM_178113	Ncapd3	non-SMC condensin II complex, subunit D3	NM_178113	RefSeq	Mus musculus non-SMC condensin II complex, subunit D3 (Ncapd3), mRNA.	-1.45028	9.45957	-14.9133	8.47874e-07	7.38138e-05	6.40226
TC1000002509.mm.2	NM_021462	Mknk2	MAP kinase-interacting serine/threonine kinase 2	NM_021462	RefSeq	Mus musculus MAP kinase-interacting serine/threonine kinase 2 (Mknk2), mRNA.	-1.45481	10.2378	-13.5505	1.68729e-06	0.000111954	5.65464
TC1100003569.mm.2	NM_177752	Eme1	essential meiotic endonuclease 1 homolog 1 (S. pombe)	NM_177752	RefSeq	Mus musculus essential meiotic endonuclease 1 homolog 1 (S. pombe) (Eme1), mRNA.	-1.45565	6.15383	-10.4875	1.03638e-05	0.000443151	3.66418
TC1700000836.mm.2	NM_001285947	Cyp39a1	cytochrome P450, family 39, subfamily a, polypeptide 1	NM_001285947	RefSeq	Mus musculus cytochrome P450, family 39, subfamily a, polypeptide 1 (Cyp39a1), transcript variant 2, mRNA.	-1.45747	9.82907	-11.609	5.07133e-06	0.000260035	4.45044
TC1100000983.mm.2	NM_144526	Fam64a	family with sequence similarity 64, member A	NM_144526	RefSeq	Mus musculus family with sequence similarity 64, member A (Fam64a), mRNA.	-1.45814	7.06996	-12.43	3.12365e-06	0.000177461	4.98183
TC0400003516.mm.2	NM_026560	Cdca8	cell division cycle associated 8	NM_026560	RefSeq	Mus musculus cell division cycle associated 8 (Cdca8), mRNA.	-1.46705	8.46114	-14.9272	8.42178e-07	7.38138e-05	6.40956
TC1800000568.mm.2	NM_010721	Lmnb1	lamin B1	NM_010721	RefSeq	Mus musculus lamin B1 (Lmnb1), mRNA.	-1.46709	7.96896	-14.6692	9.5482e-07	7.72862e-05	6.27355
TC1200001283.mm.2	NM_134041	4930427A07Rik	RIKEN cDNA 4930427A07 gene	NM_134041	RefSeq	Mus musculus RIKEN cDNA 4930427A07 gene (4930427A07Rik), mRNA.	-1.46966	6.43138	-8.65586	3.90603e-05	0.00120394	2.19929
TC0200002869.mm.2	NM_027290	Mcm10	minichromosome maintenance deficient 10 (S. cerevisiae)	NM_027290	RefSeq	Mus musculus minichromosome maintenance deficient 10 (S. cerevisiae) (Mcm10), transcript variant 2, mRNA.	-1.46982	8.55756	-12.0409	3.91538e-06	0.000213905	4.7343
TC1300001576.mm.2	NM_178186	Hist1h2ag	histone cluster 1, H2ag	NM_178186	RefSeq	Mus musculus histone cluster 1, H2ag (Hist1h2ag), mRNA.	-1.47356	10.6742	-12.6683	2.72876e-06	0.00016234	5.12974
TC1500001531.mm.2	NM_001136077	Enpp2	ectonucleotide pyrophosphatase/phosphodiesterase 2	NM_001136077	RefSeq	Mus musculus ectonucleotide pyrophosphatase/phosphodiesterase 2 (Enpp2), transcript variant 1, mRNA.	-1.47483	10.2157	-10.3709	1.12063e-05	0.000470859	3.57804
TC0900002588.mm.2	NM_029784	Fam81a	family with sequence similarity 81, member A	NM_029784	RefSeq	Mus musculus family with sequence similarity 81, member A (Fam81a), mRNA.	-1.47528	5.02365	-10.4685	1.04958e-05	0.000446429	3.65023
TC0500000819.mm.2	NM_001136260	Slc4a4	solute carrier family 4 (anion exchanger), member 4	NM_001136260	RefSeq	Mus musculus solute carrier family 4 (anion exchanger), member 4 (Slc4a4), transcript variant 2, mRNA.	-1.48065	8.35244	-8.62121	4.01432e-05	0.0012298	2.16906
TC0200001819.mm.2	NM_030234	Wdr76	WD repeat domain 76	NM_030234	RefSeq	Mus musculus WD repeat domain 76 (Wdr76), transcript variant 1, mRNA.	-1.48171	7.95743	-11.7441	4.67287e-06	0.000243735	4.54027
TC0400001151.mm.2	NM_011015	Orc1	origin recognition complex, subunit 1	NM_011015	RefSeq	Mus musculus origin recognition complex, subunit 1 (Orc1), mRNA.	-1.48417	6.94962	-7.17169	0.000137849	0.00306075	0.804727
TC0X00002631.mm.2	NM_008892	Pola1	polymerase (DNA directed), alpha 1	NM_008892	RefSeq	Mus musculus polymerase (DNA directed), alpha 1 (Pola1), mRNA.	-1.48939	8.01517	-12.5197	2.96793e-06	0.000171432	5.03781
TC0800001863.mm.2	NM_001004140	Ckap2	cytoskeleton associated protein 2	NM_001004140	RefSeq	Mus musculus cytoskeleton associated protein 2 (Ckap2), mRNA.	-1.4919	7.85414	-11.2922	6.16567e-06	0.000299041	4.23575
TC0500003513.mm.2	NM_175274	Ttyh3	tweety homolog 3 (Drosophila)	NM_175274	RefSeq	Mus musculus tweety homolog 3 (Drosophila) (Ttyh3), transcript variant 2, mRNA.	-1.49255	8.93325	-11.8327	4.43056e-06	0.000232599	4.59871
TC0X00002736.mm.2	NM_146235	Ercc6l	excision repair cross-complementing rodent repair deficiency complementation group 6 like	NM_146235	RefSeq	Mus musculus excision repair cross-complementing rodent repair deficiency complementation group 6 like (Ercc6l), mRNA.	-1.50077	6.65717	-11.1435	6.76906e-06	0.000321856	4.13309
TC0700003714.mm.2	NM_029614	Prss23	protease, serine 23	NM_029614	RefSeq	Mus musculus protease, serine 23 (Prss23), mRNA.	-1.50378	8.36441	-9.95308	1.49266e-05	0.000580944	3.26191
TC1700000997.mm.2	NM_013733	Chaf1a	chromatin assembly factor 1, subunit A (p150)	NM_013733	RefSeq	Mus musculus chromatin assembly factor 1, subunit A (p150) (Chaf1a), mRNA.	-1.50467	8.08568	-13.729	1.53629e-06	0.000105478	5.75677
TC0900002036.mm.2	NM_007691	Chek1	checkpoint kinase 1	NM_007691	RefSeq	Mus musculus checkpoint kinase 1 (Chek1), mRNA.	-1.50783	9.06248	-15.7116	5.82068e-07	5.77345e-05	6.80871
TC0300002126.mm.2	NM_025863	Trim59	tripartite motif-containing 59	NM_025863	RefSeq	Mus musculus tripartite motif-containing 59 (Trim59), mRNA.	-1.51633	6.12857	-6.92124	0.000174	0.00358091	0.5473
TC1300001574.mm.2	NM_175659	Hist1h2ah	histone cluster 1, H2ah	NM_175659	RefSeq	Mus musculus histone cluster 1, H2ah (Hist1h2ah), mRNA.	-1.51896	10.5729	-12.2131	3.54007e-06	0.000197115	4.84476
TC0700001455.mm.2	NM_009103	Rrm1	ribonucleotide reductase M1	NM_009103	RefSeq	Mus musculus ribonucleotide reductase M1 (Rrm1), mRNA.	-1.51965	10.4569	-14.8131	8.90022e-07	7.57785e-05	6.34972
TC1300000181.mm.2	NM_001177544	Hist1h2ao	histone cluster 1, H2ao	NM_001177544	RefSeq	Mus musculus histone cluster 1, H2ao (Hist1h2ao), mRNA.	-1.52204	10.6668	-12.6507	2.75589e-06	0.00016234	5.11892
TC1300001565.mm.2	ENSMUST00000081342	Hist1h2ap	histone cluster 1, H2ap	ENSMUST00000081342	ENSEMBL	histone cluster 1, H2ap [gene_biotype:protein_coding transcript_biotype:protein_coding]	-1.52204	10.6668	-12.6507	2.75589e-06	0.00016234	5.11892
TC1100001684.mm.2	NM_153544	BC030867	cDNA sequence BC030867	NM_153544	RefSeq	Mus musculus cDNA sequence BC030867 (BC030867), mRNA.	-1.52345	6.28487	-11.4742	5.5078e-06	0.000275413	4.35975
TC0200001881.mm.2	NM_001159646	Dut	deoxyuridine triphosphatase	NM_001159646	RefSeq	Mus musculus deoxyuridine triphosphatase (Dut), transcript variant 1, mRNA.	-1.52603	8.11953	-9.25658	2.4662e-05	0.000847826	2.70753
TC0900001302.mm.2	NM_176979	Topbp1	topoisomerase (DNA) II binding protein 1	NM_176979	RefSeq	Mus musculus topoisomerase (DNA) II binding protein 1 (Topbp1), mRNA.	-1.53381	8.9421	-11.5255	5.33696e-06	0.000269094	4.39436
TC1300001374.mm.2	NM_001047159	Net1	neuroepithelial cell transforming gene 1	NM_001047159	RefSeq	Mus musculus neuroepithelial cell transforming gene 1 (Net1), transcript variant 2, mRNA.	-1.53514	7.74538	-14.5079	1.03387e-06	8.15038e-05	6.18729
TC0300002499.mm.2	NM_175662	Hist2h2ac	histone cluster 2, H2ac	NM_175662	RefSeq	Mus musculus histone cluster 2, H2ac (Hist2h2ac), mRNA.	-1.54086	10.9675	-12.933	2.35479e-06	0.000144659	5.29089
TC0200004942.mm.2	NM_007891	E2f1	E2F transcription factor 1	NM_007891	RefSeq	Mus musculus E2F transcription factor 1 (E2f1), transcript variant 1, mRNA.	-1.54271	8.30399	-9.01955	2.94765e-05	0.000970745	2.51048
TC0300000624.mm.2	NM_029482	4930579G24Rik	RIKEN cDNA 4930579G24 gene	NM_029482	RefSeq	Mus musculus RIKEN cDNA 4930579G24 gene (4930579G24Rik), mRNA.	-1.54437	7.76624	-9.82099	1.63786e-05	0.000619361	3.15948
TC0200002043.mm.2	NM_025676	Mcm8	minichromosome maintenance deficient 8 (S. cerevisiae)	NM_025676	RefSeq	Mus musculus minichromosome maintenance deficient 8 (S. cerevisiae) (Mcm8), transcript variant 2, mRNA.	-1.55308	8.00383	-16.875	3.47148e-07	3.91904e-05	7.36424
TC0100002143.mm.2	NM_177235	Bend6	BEN domain containing 6	NM_177235	RefSeq	Mus musculus BEN domain containing 6 (Bend6), transcript variant 1, mRNA.	-1.55773	6.68462	-9.81659	1.64296e-05	0.000619361	3.15604
TC1300000599.mm.2	NM_025415	Cks2	CDC28 protein kinase regulatory subunit 2	NM_025415	RefSeq	Mus musculus CDC28 protein kinase regulatory subunit 2 (Cks2), mRNA.	-1.55976	6.62034	-9.34977	2.30168e-05	0.000799331	2.7838
TC1300001991.mm.2	ENSMUST00000091708	Hist1h2al	histone cluster 1, H2al	ENSMUST00000091708	ENSEMBL	histone cluster 1, H2al [gene_biotype:protein_coding transcript_biotype:protein_coding]	-1.56574	10.5946	-11.4023	5.75743e-06	0.000283791	4.31105
TC0700001151.mm.2	NM_001285997	Prc1	protein regulator of cytokinesis 1	NM_001285997	RefSeq	Mus musculus protein regulator of cytokinesis 1 (Prc1), transcript variant 2, mRNA.	-1.56598	9.09539	-14.517	1.02919e-06	8.14004e-05	6.19221
TC1300000245.mm.2	NM_175661	Hist1h2af	histone cluster 1, H2af	NM_175661	RefSeq	Mus musculus histone cluster 1, H2af (Hist1h2af), mRNA.	-1.56647	10.4608	-10.3607	1.12839e-05	0.000472479	3.57043
TC1300001631.mm.2	NM_175655	Hist1h4f	histone cluster 1, H4f	NM_175655	RefSeq	Mus musculus histone cluster 1, H4f (Hist1h4f), mRNA.	-1.57208	10.3776	-15.1959	7.40584e-07	6.81506e-05	6.54865
TC1000000324.mm.2	NM_028006	Tube1	epsilon-tubulin 1	NM_028006	RefSeq	Mus musculus epsilon-tubulin 1 (Tube1), mRNA.	-1.5781	7.99312	-10.0568	1.38877e-05	0.000551903	3.3415
TC0500002152.mm.2	NM_021288	Tyms	thymidylate synthase	NM_021288	RefSeq	Mus musculus thymidylate synthase (Tyms), transcript variant 1, mRNA.	-1.58469	9.16085	-15.4019	6.7205e-07	6.30424e-05	6.65359
TC1300001634.mm.2	NM_178187	Hist1h2ae	histone cluster 1, H2ae	NM_178187	RefSeq	Mus musculus histone cluster 1, H2ae (Hist1h2ae), mRNA.	-1.58705	9.80434	-14.8085	8.92039e-07	7.57785e-05	6.34726
TC1200002150.mm.2	NM_181815	Cep128	centrosomal protein 128	NM_181815	RefSeq	Mus musculus centrosomal protein 128 (Cep128), mRNA.	-1.58739	7.31871	-9.20515	2.56263e-05	0.000877239	2.66515
TC1100003808.mm.2	NM_009764	Brca1	breast cancer 1, early onset	NM_009764	RefSeq	Mus musculus breast cancer 1, early onset (Brca1), mRNA.	-1.60098	9.36495	-11.3707	5.87134e-06	0.000287648	4.28952
TC1000000508.mm.2	NM_021272	Fabp7	fatty acid binding protein 7, brain	NM_021272	RefSeq	Mus musculus fatty acid binding protein 7, brain (Fabp7), mRNA.	-1.6059	7.94663	-8.96349	3.0764e-05	0.00100479	2.46323
TC1300001561.mm.2	NM_178207	Hist1h3i	histone cluster 1, H3i	NM_178207	RefSeq	Mus musculus histone cluster 1, H3i (Hist1h3i), mRNA.	-1.61295	10.3665	-11.5123	5.38008e-06	0.000270142	4.38553
TC1900000560.mm.2	NM_008234	Hells	helicase, lymphoid specific	NM_008234	RefSeq	Mus musculus helicase, lymphoid specific (Hells), mRNA.	-1.61381	8.03791	-8.28597	5.25524e-05	0.00149281	1.8712
TC0400001770.mm.2	NM_008812	Padi2	peptidyl arginine deiminase, type II	NM_008812	RefSeq	Mus musculus peptidyl arginine deiminase, type II (Padi2), mRNA.	-1.6152	7.58178	-10.9313	7.74957e-06	0.000356568	3.98427
TC0300002750.mm.2	NM_029522	Gpsm2	G-protein signalling modulator 2 (AGS3-like, C. elegans)	NM_029522	RefSeq	Mus musculus G-protein signalling modulator 2 (AGS3-like, C. elegans) (Gpsm2), mRNA.	-1.61635	7.41317	-8.40261	4.78026e-05	0.00139732	1.97596
TC1000001579.mm.2	NM_008921	Prim1	DNA primase, p49 subunit	NM_008921	RefSeq	Mus musculus DNA primase, p49 subunit (Prim1), mRNA.	-1.62025	9.64659	-15.9208	5.29028e-07	5.37963e-05	6.91168
TC1100004147.mm.2	NM_001271729	Tk1	thymidine kinase 1	NM_001271729	RefSeq	Mus musculus thymidine kinase 1 (Tk1), transcript variant 2, mRNA.	-1.62317	7.88465	-10.4752	1.04491e-05	0.000445568	3.65514
TC0600002690.mm.2	NM_008564	Mcm2	minichromosome maintenance deficient 2 mitotin (S. cerevisiae)	NM_008564	RefSeq	Mus musculus minichromosome maintenance deficient 2 mitotin (S. cerevisiae) (Mcm2), mRNA.	-1.63094	9.6479	-14.7999	8.9575e-07	7.58005e-05	6.34277
TC0400003271.mm.2	NM_007671	Cdkn2c	cyclin-dependent kinase inhibitor 2C (p18, inhibits CDK4)	NM_007671	RefSeq	Mus musculus cyclin-dependent kinase inhibitor 2C (p18, inhibits CDK4) (Cdkn2c), transcript variant 2, mRNA.	-1.63552	8.22069	-12.0595	3.87274e-06	0.000212302	4.74631
TC0100003814.mm.2	NM_029766	Dtl	denticleless homolog (Drosophila)	NM_029766	RefSeq	Mus musculus denticleless homolog (Drosophila) (Dtl), transcript variant 1, mRNA.	-1.64204	8.37198	-16.5537	3.99025e-07	4.29209e-05	7.2149
TC1500000578.mm.2	XM_003085083.1	Gm19945	PREDICTED: predicted gene, 19945 (Gm19945), mRNA.	XM_003085083.1	MGI/Jackson Lab	PREDICTED: predicted gene, 19945 (Gm19945), mRNA.	-1.64247	9.04835	-13.9625	1.36136e-06	9.69049e-05	5.88834
TC1300000174.mm.2	NM_178206	Hist1h3h	histone cluster 1, H3h	NM_178206	RefSeq	Mus musculus histone cluster 1, H3h (Hist1h3h), mRNA.	-1.64823	10.3601	-13.7685	1.50503e-06	0.00010407	5.77916
TC1700000705.mm.2	NM_001010833	Mdc1	mediator of DNA damage checkpoint 1	NM_001010833	RefSeq	Mus musculus mediator of DNA damage checkpoint 1 (Mdc1), mRNA.	-1.65226	7.96666	-10.1182	1.33111e-05	0.000534252	3.38827
TC1300001666.mm.2	NM_020567	Gmnn	geminin	NM_020567	RefSeq	Mus musculus geminin (Gmnn), mRNA.	-1.65253	5.44002	-14.7199	9.31407e-07	7.66732e-05	6.30047
TC1000001282.mm.2	NM_178609	E2f7	E2F transcription factor 7	NM_178609	RefSeq	Mus musculus E2F transcription factor 7 (E2f7), mRNA.	-1.65479	7.23046	-9.64606	1.85524e-05	0.000679281	3.02192
TC1700001003.mm.2	NM_001111078	Uhrf1	ubiquitin-like, containing PHD and RING finger domains, 1	NM_001111078	RefSeq	Mus musculus ubiquitin-like, containing PHD and RING finger domains, 1 (Uhrf1), transcript variant 2, mRNA.	-1.65545	9.63377	-13.1508	2.0901e-06	0.000134176	5.42112
TC0200002010.mm.2	NM_001111075	Cdc25b	cell division cycle 25B	NM_001111075	RefSeq	Mus musculus cell division cycle 25B (Cdc25b), transcript variant 2, mRNA.	-1.65639	7.27789	-12.9239	2.36659e-06	0.000144659	5.28543
TC0700004225.mm.2	NM_001081238	Palb2	partner and localizer of BRCA2	NM_001081238	RefSeq	Mus musculus partner and localizer of BRCA2 (Palb2), transcript variant 1, mRNA.	-1.66015	6.15696	-11.5786	5.16641e-06	0.000263599	4.43004
TC0300001289.mm.2	NM_197997	Zgrf1	zinc finger, GRF-type containing 1	NM_197997	RefSeq	Mus musculus zinc finger, GRF-type containing 1 (Zgrf1), mRNA.	-1.66227	7.41755	-9.95271	1.49305e-05	0.000580944	3.26163
TC0700004655.mm.2	NM_001042527	Blm	Bloom syndrome, RecQ helicase-like	NM_001042527	RefSeq	Mus musculus Bloom syndrome, RecQ helicase-like (Blm), transcript variant 2, mRNA.	-1.66269	8.29212	-12.1819	3.60498e-06	0.000200109	4.82485
TC0600000648.mm.2	NM_001163640	Chn2	chimerin 2	NM_001163640	RefSeq	Mus musculus chimerin 2 (Chn2), transcript variant 2, mRNA.	-1.69165	7.81554	-12.0575	3.87726e-06	0.000212302	4.74503
TC1300002306.mm.2	NM_027182	Trip13	thyroid hormone receptor interactor 13	NM_027182	RefSeq	Mus musculus thyroid hormone receptor interactor 13 (Trip13), mRNA.	-1.69913	8.54934	-14.3721	1.10618e-06	8.40794e-05	6.11392
TC0400000207.mm.2	NM_199467	Mms22l	MMS22-like, DNA repair protein	NM_199467	RefSeq	Mus musculus MMS22-like, DNA repair protein (Mms22l), mRNA.	-1.70193	8.34823	-7.77441	8.06961e-05	0.00208655	1.39686
TC1200001420.mm.2	NM_177331	Gen1	Gen homolog 1, endonuclease (Drosophila)	NM_177331	RefSeq	Mus musculus Gen homolog 1, endonuclease (Drosophila) (Gen1), mRNA.	-1.70661	8.22883	-10.2808	1.19105e-05	0.000491907	3.51086
TC0400003331.mm.2	NM_001122958	Rad54l	RAD54 like (S. cerevisiae)	NM_001122958	RefSeq	Mus musculus RAD54 like (S. cerevisiae) (Rad54l), transcript variant 2, mRNA.	-1.70783	8.0817	-16.2186	4.6268e-07	4.8686e-05	7.0559
TC0700004310.mm.2	NM_145588	Kif22	kinesin family member 22	NM_145588	RefSeq	Mus musculus kinesin family member 22 (Kif22), mRNA.	-1.71443	8.04142	-8.39283	4.81815e-05	0.00140375	1.96723
TC0200004440.mm.2	NM_001042653	Oip5	Opa interacting protein 5	NM_001042653	RefSeq	Mus musculus Opa interacting protein 5 (Oip5), mRNA.	-1.71956	7.52238	-9.01064	2.96771e-05	0.000974551	2.50299
TC0100003241.mm.2	NM_001024720	Hmcn1	hemicentin 1	NM_001024720	RefSeq	Mus musculus hemicentin 1 (Hmcn1), mRNA.	-1.72258	6.5996	-11.5983	5.10467e-06	0.000261191	4.44324
TC1000000592.mm.2	NM_177372	Dna2	DNA replication helicase 2 homolog (yeast)	NM_177372	RefSeq	Mus musculus DNA replication helicase 2 homolog (yeast) (Dna2), mRNA.	-1.72352	6.95601	-11.8846	4.2954e-06	0.000228866	4.63271
TC0500001270.mm.2	NM_007708	Cit	citron	NM_007708	RefSeq	Mus musculus citron (Cit), mRNA.	-1.72369	7.47009	-14.4893	1.04345e-06	8.17266e-05	6.17728
TC0500000360.mm.2	NM_001040435	Tacc3	transforming, acidic coiled-coil containing protein 3	NM_001040435	RefSeq	Mus musculus transforming, acidic coiled-coil containing protein 3 (Tacc3), transcript variant 2, mRNA.	-1.7307	8.15088	-15.6604	5.95969e-07	5.86327e-05	6.78326
TC1500001568.mm.2	NM_027435	Atad2	ATPase family, AAA domain containing 2	NM_027435	RefSeq	Mus musculus ATPase family, AAA domain containing 2 (Atad2), mRNA.	-1.73272	9.79617	-14.1469	1.23906e-06	9.0053e-05	5.99069
TC1300000246.mm.2	NM_145073	Hist1h3g	histone cluster 1, H3g	NM_145073	RefSeq	Mus musculus histone cluster 1, H3g (Hist1h3g), mRNA.	-1.73421	10.1026	-11.1282	6.83517e-06	0.000323728	4.1224
TC1900001096.mm.2	NM_001271614	Fen1	flap structure specific endonuclease 1	NM_001271614	RefSeq	Mus musculus flap structure specific endonuclease 1 (Fen1), transcript variant 2, mRNA.	-1.73742	8.27788	-11.9568	4.11498e-06	0.000222301	4.67978
TC0500003472.mm.2	NM_008568	Mcm7	minichromosome maintenance deficient 7 (S. cerevisiae)	NM_008568	RefSeq	Mus musculus minichromosome maintenance deficient 7 (S. cerevisiae) (Mcm7), mRNA.	-1.75112	10.3681	-17.8837	2.27792e-07	2.8864e-05	7.81424
TC1100004272.mm.2	NM_001284392	2018-09-04	septin 4	NM_001284392	RefSeq	Mus musculus septin 4 (Sept4), transcript variant 2, mRNA.	-1.75236	5.30458	-11.8991	4.25857e-06	0.000227519	4.64215
TC0400001465.mm.2	NM_175554	Clspn	claspin	NM_175554	RefSeq	Mus musculus claspin (Clspn), mRNA.	-1.75262	6.32809	-11.6321	5.00059e-06	0.000257499	4.46586
TC0800003099.mm.2	NM_016925	Fanca	Fanconi anemia, complementation group A	NM_016925	RefSeq	Mus musculus Fanconi anemia, complementation group A (Fanca), mRNA.	-1.75328	8.45294	-15.1593	7.53587e-07	6.88239e-05	6.52983
TC0900000819.mm.2	NM_025372	Tipin	timeless interacting protein	NM_025372	RefSeq	Mus musculus timeless interacting protein (Tipin), mRNA.	-1.76356	7.75498	-11.1335	6.81197e-06	0.000323261	4.12614
TC0100002285.mm.2	NM_016917	Slc40a1	solute carrier family 40 (iron-regulated transporter), member 1	NM_016917	RefSeq	Mus musculus solute carrier family 40 (iron-regulated transporter), member 1 (Slc40a1), mRNA.	-1.77252	6.89533	-9.14927	2.67226e-05	0.000904532	2.61887
TC0200001866.mm.2	NM_172537	Sema6d	sema domain, transmembrane domain (TM), and cytoplasmic domain, (semaphorin) 6D	NM_172537	RefSeq	Mus musculus sema domain, transmembrane domain (TM), and cytoplasmic domain, (semaphorin) 6D (Sema6d), transcript variant 1, mRNA.	-1.78904	8.97945	-9.72063	1.75883e-05	0.00064988	3.08083
TC0500001865.mm.2	NM_001081001	Brca2	breast cancer 2, early onset	NM_001081001	RefSeq	Mus musculus breast cancer 2, early onset (Brca2), transcript variant 1, mRNA.	-1.79378	8.58261	-8.39948	4.79236e-05	0.00139909	1.97317
TC0300000929.mm.2	NM_178213	Hist2h2ab	histone cluster 2, H2ab	NM_178213	RefSeq	Mus musculus histone cluster 2, H2ab (Hist2h2ab), mRNA.	-1.79775	6.86944	-11.2737	6.23725e-06	0.000301908	4.22306
TC0100002033.mm.2	NM_008563	Mcm3	minichromosome maintenance deficient 3 (S. cerevisiae)	NM_008563	RefSeq	Mus musculus minichromosome maintenance deficient 3 (S. cerevisiae) (Mcm3), mRNA.	-1.80005	9.7452	-16.8145	3.56299e-07	3.99219e-05	7.33636
TC1400002290.mm.2	NM_001110162	Cdca2	cell division cycle associated 2	NM_001110162	RefSeq	Mus musculus cell division cycle associated 2 (Cdca2), transcript variant 1, mRNA.	-1.80041	7.52473	-15.5262	6.34166e-07	6.06643e-05	6.71623
TC1900000996.mm.2	XM_003085380.1	Gm19505	PREDICTED: predicted gene, 19505 (Gm19505), mRNA.	XM_003085380.1	MGI/Jackson Lab	PREDICTED: predicted gene, 19505 (Gm19505), mRNA.	-1.80565	5.23094	-12.7468	2.61127e-06	0.000156819	5.17788
TC0400001215.mm.2	NM_009185	Stil	Scl/Tal1 interrupting locus	NM_009185	RefSeq	Mus musculus Scl/Tal1 interrupting locus (Stil), transcript variant 1, mRNA.	-1.81722	7.86516	-13.4614	1.76887e-06	0.000116332	5.60317
TC1300000248.mm.2	NM_145713	Hist1h1d	histone cluster 1, H1d	NM_145713	RefSeq	Mus musculus histone cluster 1, H1d (Hist1h1d), mRNA.	-1.82474	8.56937	-14.2841	1.15607e-06	8.63554e-05	6.06602
TC0200001056.mm.2	NM_025866	Cdca7	cell division cycle associated 7	NM_025866	RefSeq	Mus musculus cell division cycle associated 7 (Cdca7), mRNA.	-1.82671	6.56332	-7.34477	0.000117784	0.00273572	0.978645
TC1600002055.mm.2	NM_025642	Mis18a	MIS18 kinetochore protein homolog A (S. pombe)	NM_025642	RefSeq	Mus musculus MIS18 kinetochore protein homolog A (S. pombe) (Mis18a), mRNA.	-1.82882	7.85143	-10.7766	8.56549e-06	0.000383892	3.87408
TC1300001033.mm.2	NM_010049	Dhfr	dihydrofolate reductase	NM_010049	RefSeq	Mus musculus dihydrofolate reductase (Dhfr), mRNA.	-1.83621	9.10527	-19.6577	1.14432e-07	1.75284e-05	8.54316
TC1300002542.mm.2	NM_021886	Cenph	centromere protein H	NM_021886	RefSeq	Mus musculus centromere protein H (Cenph), mRNA.	-1.84295	7.1549	-11.3456	5.96375e-06	0.000290997	4.27235
TC1600000700.mm.2	NM_172616	C330027C09Rik	RIKEN cDNA C330027C09 gene	NM_172616	RefSeq	Mus musculus RIKEN cDNA C330027C09 gene (C330027C09Rik), mRNA.	-1.84347	9.38554	-8.16156	5.82108e-05	0.00161991	1.75811
TC0800000846.mm.2	NM_008566	Mcm5	minichromosome maintenance deficient 5, cell division cycle 46 (S. cerevisiae)	NM_008566	RefSeq	Mus musculus minichromosome maintenance deficient 5, cell division cycle 46 (S. cerevisiae) (Mcm5), transcript variant 1, mRNA.	-1.84456	8.43562	-11.0753	7.06821e-06	0.000331521	4.08553
TC1400001931.mm.2	NM_172598	Wdhd1	WD repeat and HMG-box DNA binding protein 1	NM_172598	RefSeq	Mus musculus WD repeat and HMG-box DNA binding protein 1 (Wdhd1), mRNA.	-1.85326	7.52356	-11.4941	5.44058e-06	0.000272615	4.37324
TC1100001973.mm.2	NM_001012273	Birc5	baculoviral IAP repeat-containing 5	NM_001012273	RefSeq	Mus musculus baculoviral IAP repeat-containing 5 (Birc5), transcript variant 3, mRNA.	-1.85614	9.33764	-17.5992	2.55928e-07	3.14414e-05	7.69012
TC1100000822.mm.2	NM_008885	Pmp22	peripheral myelin protein 22	NM_008885	RefSeq	Mus musculus peripheral myelin protein 22 (Pmp22), transcript variant 1, mRNA.	-1.86302	10.2591	-14.8077	8.92359e-07	7.57785e-05	6.34688
TC0200002532.mm.2	NM_026785	Ube2c	ubiquitin-conjugating enzyme E2C	NM_026785	RefSeq	Mus musculus ubiquitin-conjugating enzyme E2C (Ube2c), mRNA.	-1.87164	9.89602	-15.6878	5.88491e-07	5.81333e-05	6.79688
TC1300000260.mm.2	NM_175660	Hist1h2ab	histone cluster 1, H2ab	NM_175660	RefSeq	Mus musculus histone cluster 1, H2ab (Hist1h2ab), mRNA.	-1.87525	10.0691	-13.7517	1.51825e-06	0.000104685	5.76964
TC1200000719.mm.2	NM_001252562	Rad51b	RAD51 homolog B	NM_001252562	RefSeq	Mus musculus RAD51 homolog B (Rad51b), transcript variant 2, mRNA.	-1.87579	6.81624	-9.5332	2.01268e-05	0.000721641	2.93198
TC1300001558.mm.2	NM_178183	Hist1h2ak	histone cluster 1, H2ak	NM_178183	RefSeq	Mus musculus histone cluster 1, H2ak (Hist1h2ak), mRNA.	-1.87596	9.44796	-14.3684	1.10823e-06	8.40794e-05	6.11191
TC1900001510.mm.2	NM_001163495	Arhgap19	Rho GTPase activating protein 19	NM_001163495	RefSeq	Mus musculus Rho GTPase activating protein 19 (Arhgap19), transcript variant 2, mRNA.	-1.87666	7.97659	-10.7808	8.54231e-06	0.000383564	3.87706
TC1200001602.mm.2	NM_011158	Prkar2b	protein kinase, cAMP dependent regulatory, type II beta	NM_011158	RefSeq	Mus musculus protein kinase, cAMP dependent regulatory, type II beta (Prkar2b), mRNA.	-1.87865	7.7349	-10.433	1.07486e-05	0.000455584	3.624
TC1000002493.mm.2	NM_010255	Gamt	guanidinoacetate methyltransferase	NM_010255	RefSeq	Mus musculus guanidinoacetate methyltransferase (Gamt), mRNA.	-1.88902	7.25065	-15.9894	5.12838e-07	5.25919e-05	6.94515
TC1200001834.mm.2	NM_172578	Mis18bp1	MIS18 binding protein 1	NM_172578	RefSeq	Mus musculus MIS18 binding protein 1 (Mis18bp1), mRNA.	-1.89131	9.03936	-10.5424	9.99148e-06	0.000432952	3.70448
TC0200002478.mm.2	NM_008652	Mybl2	myeloblastosis oncogene-like 2	NM_008652	RefSeq	Mus musculus myeloblastosis oncogene-like 2 (Mybl2), mRNA.	-1.90197	7.37312	-15.3449	6.90247e-07	6.40052e-05	6.62473
TC0600003167.mm.2	NM_009013	Rad51ap1	RAD51 associated protein 1	NM_009013	RefSeq	Mus musculus RAD51 associated protein 1 (Rad51ap1), mRNA.	-1.90201	5.59054	-9.42137	2.18364e-05	0.000767032	2.84195
TC0700001131.mm.2	NM_029835	Ticrr	TOPBP1-interacting checkpoint and replication regulator	NM_029835	RefSeq	Mus musculus TOPBP1-interacting checkpoint and replication regulator (Ticrr), mRNA.	-1.90784	8.79668	-11.1228	6.85854e-06	0.0003242	4.11865
TC1100000164.mm.2	NM_176982	Fbxo48	F-box protein 48	NM_176982	RefSeq	Mus musculus F-box protein 48 (Fbxo48), mRNA.	-1.90992	4.50723	-8.83338	3.40039e-05	0.00109002	2.35255
TC1300001960.mm.2	NM_025495	Cenpp	centromere protein P	NM_025495	RefSeq	Mus musculus centromere protein P (Cenpp), mRNA.	-1.91163	6.22662	-12.8282	2.49541e-06	0.000151363	5.22749
TC0400001135.mm.2	NM_001080926	Lrp8	low density lipoprotein receptor-related protein 8, apolipoprotein e receptor	NM_001080926	RefSeq	Mus musculus low density lipoprotein receptor-related protein 8, apolipoprotein e receptor (Lrp8), transcript variant 2, mRNA.	-1.92083	7.66221	-12.4953	3.00936e-06	0.000172999	5.02264
TC0800001390.mm.2	NM_028131	Cenpn	centromere protein N	NM_028131	RefSeq	Mus musculus centromere protein N (Cenpn), mRNA.	-1.92558	8.38783	-14.8531	8.72894e-07	7.52655e-05	6.37076
TC0200002301.mm.2	NM_001141975	Tpx2	TPX2, microtubule-associated protein homolog (Xenopus laevis)	NM_001141975	RefSeq	Mus musculus TPX2, microtubule-associated protein homolog (Xenopus laevis) (Tpx2), transcript variant 3, mRNA.	-1.9309	9.25312	-17.1127	3.13663e-07	3.6149e-05	7.47282
TC0500002887.mm.2	NM_010097	Sparcl1	SPARC-like 1	NM_010097	RefSeq	Mus musculus SPARC-like 1 (Sparcl1), mRNA.	-1.93626	7.48179	-9.94515	1.50095e-05	0.000582149	3.2558
TC0700004624.mm.2	NM_011121	Plk1	polo-like kinase 1	NM_011121	RefSeq	Mus musculus polo-like kinase 1 (Plk1), mRNA.	-1.94032	10.3053	-16.0031	5.0966e-07	5.25863e-05	6.95185
TC0800000937.mm.2	NM_024184	Asf1b	anti-silencing function 1B histone chaperone	NM_024184	RefSeq	Mus musculus anti-silencing function 1B histone chaperone (Asf1b), mRNA.	-1.94577	9.65107	-14.379	1.10235e-06	8.40794e-05	6.11769
TC1500001940.mm.2	NM_001080158	Cenpm	centromere protein M	NM_001080158	RefSeq	Mus musculus centromere protein M (Cenpm), transcript variant 3, mRNA.	-1.94852	8.29728	-10.5358	1.00358e-05	0.000432952	3.69961
TC0400000085.mm.2	NM_001037134	Ccne2	cyclin E2	NM_001037134	RefSeq	Mus musculus cyclin E2 (Ccne2), transcript variant 1, mRNA.	-1.95331	6.92122	-8.46735	4.53753e-05	0.00134911	2.03359
TC1900000099.mm.2	NM_026410	Cdca5	cell division cycle associated 5	NM_026410	RefSeq	Mus musculus cell division cycle associated 5 (Cdca5), mRNA.	-1.96539	8.06562	-8.54291	4.27158e-05	0.00128904	2.10038
TC0400001678.mm.2	NM_177733	E2f2	E2F transcription factor 2	NM_177733	RefSeq	Mus musculus E2F transcription factor 2 (E2f2), transcript variant 1, mRNA.	-1.97336	6.86475	-17.8043	2.35276e-07	2.96363e-05	7.77981
TC1400001935.mm.2	NM_144553	Dlgap5	discs, large (Drosophila) homolog-associated protein 5	NM_144553	RefSeq	Mus musculus discs, large (Drosophila) homolog-associated protein 5 (Dlgap5), mRNA.	-1.97425	8.84844	-11.0839	7.02946e-06	0.000330344	4.09157
TC0200003103.mm.2	NM_025979	Mastl	microtubule associated serine/threonine kinase-like	NM_025979	RefSeq	Mus musculus microtubule associated serine/threonine kinase-like (Mastl), mRNA.	-1.98909	8.44186	-16.8683	3.4815e-07	3.91904e-05	7.36115
TC1600000530.mm.2	NM_001159369	Polq	polymerase (DNA directed), theta	NM_001159369	RefSeq	Mus musculus polymerase (DNA directed), theta (Polq), transcript variant 2, mRNA.	-1.99304	7.17978	-14.7	9.40513e-07	7.71604e-05	6.28992
TC1400000322.mm.2	NM_027289	Nt5dc2	5-nucleotidase domain containing 2	NM_027289	RefSeq	Mus musculus 5-nucleotidase domain containing 2 (Nt5dc2), mRNA.	-1.99365	8.78226	-14.5617	1.0067e-06	8.0705e-05	6.21618
TC0100002541.mm.2	NM_007525	Bard1	BRCA1 associated RING domain 1	NM_007525	RefSeq	Mus musculus BRCA1 associated RING domain 1 (Bard1), mRNA.	-1.99636	7.46942	-17.56	2.60105e-07	3.17932e-05	7.67285
TC1600001254.mm.2	NM_008565	Mcm4	minichromosome maintenance deficient 4 homolog (S. cerevisiae)	NM_008565	RefSeq	Mus musculus minichromosome maintenance deficient 4 homolog (S. cerevisiae) (Mcm4), mRNA.	-1.99842	9.09829	-13.5725	1.66777e-06	0.00011144	5.66732
TC0900001908.mm.2	NM_028390	Anln	anillin, actin binding protein	NM_028390	RefSeq	Mus musculus anillin, actin binding protein (Anln), mRNA.	-2.00732	9.06637	-13.7263	1.53846e-06	0.000105478	5.75524
TC1400000501.mm.2	NM_028222	Cdkn3	cyclin-dependent kinase inhibitor 3	NM_028222	RefSeq	Mus musculus cyclin-dependent kinase inhibitor 3 (Cdkn3), mRNA.	-2.00794	8.76984	-11.9785	4.06242e-06	0.000220446	4.69388
TC1100001195.mm.2	NM_001029856	Atad5	ATPase family, AAA domain containing 5	NM_001029856	RefSeq	Mus musculus ATPase family, AAA domain containing 5 (Atad5), mRNA.	-2.00882	6.33893	-12.2187	3.5285e-06	0.000197115	4.84834
TC0600001443.mm.2	NM_001163268	Lpar5	lysophosphatidic acid receptor 5	NM_001163268	RefSeq	Mus musculus lysophosphatidic acid receptor 5 (Lpar5), transcript variant 1, mRNA.	-2.00907	8.07905	-11.6117	5.06309e-06	0.000260035	4.45222
TC0800000629.mm.2	NM_008252	Hmgb2	high mobility group box 2	NM_008252	RefSeq	Mus musculus high mobility group box 2 (Hmgb2), mRNA.	-2.01936	8.64545	-12.9428	2.34214e-06	0.000144659	5.29677
TC1600001050.mm.2	NM_028083	Chaf1b	chromatin assembly factor 1, subunit B (p60)	NM_028083	RefSeq	Mus musculus chromatin assembly factor 1, subunit B (p60) (Chaf1b), mRNA.	-2.02773	8.96322	-15.8153	5.55065e-07	5.57415e-05	6.85992
TC0100003783.mm.2	NM_001081363	Cenpf	centromere protein F	NM_001081363	RefSeq	Mus musculus centromere protein F (Cenpf), mRNA.	-2.02879	7.55723	-14.8988	8.53829e-07	7.40659e-05	6.39468
TC0400000567.mm.2	NM_008017	Smc2	structural maintenance of chromosomes 2	NM_008017	RefSeq	Mus musculus structural maintenance of chromosomes 2 (Smc2), transcript variant 2, mRNA.	-2.03194	8.7565	-10.2634	1.20519e-05	0.000496055	3.49785
TC0200004598.mm.2	NM_181589	Ckap2l	cytoskeleton associated protein 2-like	NM_181589	RefSeq	Mus musculus cytoskeleton associated protein 2-like (Ckap2l), mRNA.	-2.03299	8.11331	-14.1307	1.24926e-06	9.05228e-05	5.98178
TC0600000772.mm.2	NM_019499	Mad2l1	MAD2 mitotic arrest deficient-like 1	NM_019499	RefSeq	Mus musculus MAD2 mitotic arrest deficient-like 1 (Mad2l1), mRNA.	-2.03523	10.3165	-17.8898	2.27227e-07	2.8864e-05	7.81688
TC0300001757.mm.2	NM_001177625	Ect2	ect2 oncogene	NM_001177625	RefSeq	Mus musculus ect2 oncogene (Ect2), transcript variant 2, mRNA.	-2.04479	9.7695	-15.6351	6.02969e-07	5.90812e-05	6.77067
TC0300002838.mm.2	NM_178936	Tmem56	transmembrane protein 56	NM_178936	RefSeq	Mus musculus transmembrane protein 56 (Tmem56), mRNA.	-2.04543	10.3182	-14.0938	1.2729e-06	9.16869e-05	5.9614
TC1900000508.mm.2	NM_183046	Kif20b	kinesin family member 20B	NM_183046	RefSeq	Mus musculus kinesin family member 20B (Kif20b), mRNA.	-2.05257	9.71434	-13.0835	2.16811e-06	0.000137724	5.38111
TC0500001139.mm.2	NM_011132	Pole	polymerase (DNA directed), epsilon	NM_011132	RefSeq	Mus musculus polymerase (DNA directed), epsilon (Pole), mRNA.	-2.05596	7.20795	-14.6821	9.48776e-07	7.72862e-05	6.28044
TC0900002254.mm.2	NM_001081445	Ncam1	neural cell adhesion molecule 1	NM_001081445	RefSeq	Mus musculus neural cell adhesion molecule 1 (Ncam1), transcript variant 1, mRNA.	-2.05819	8.57206	-9.40377	2.21202e-05	0.000773632	2.82768
TC1800001586.mm.2	NM_001164355	Ska1	spindle and kinetochore associated complex subunit 1	NM_001164355	RefSeq	Mus musculus spindle and kinetochore associated complex subunit 1 (Ska1), transcript variant 2, mRNA.	-2.05985	5.46304	-7.16753	0.000138376	0.00306683	0.800506
TC0400000091.mm.2	NM_001039556	Rad54b	RAD54 homolog B (S. cerevisiae)	NM_001039556	RefSeq	Mus musculus RAD54 homolog B (S. cerevisiae) (Rad54b), transcript variant 1, mRNA.	-2.06174	7.10001	-10.0711	1.3751e-05	0.000549177	3.35241
TC0400003122.mm.2	NM_172872	Kank4	KN motif and ankyrin repeat domains 4	NM_172872	RefSeq	Mus musculus KN motif and ankyrin repeat domains 4 (Kank4), mRNA.	-2.07004	6.99709	-17.9171	2.24726e-07	2.87769e-05	7.82866
TC1100003470.mm.2	NM_175563	Prr11	proline rich 11	NM_175563	RefSeq	Mus musculus proline rich 11 (Prr11), mRNA.	-2.07013	8.6776	-9.89329	1.55651e-05	0.000594173	3.2157
TC1500001005.mm.2	NM_001162506	Troap	trophinin associated protein	NM_001162506	RefSeq	Mus musculus trophinin associated protein (Troap), transcript variant 2, mRNA.	-2.07441	8.4583	-13.0867	2.16432e-06	0.000137724	5.38302
TC0300001364.mm.2	NM_173762	Cenpe	centromere protein E	NM_173762	RefSeq	Mus musculus centromere protein E (Cenpe), mRNA.	-2.09239	8.61616	-10.412	1.0901e-05	0.000459626	3.60849
TC0200005271.mm.2	NM_011497	Aurka	aurora kinase A	NM_011497	RefSeq	Mus musculus aurora kinase A (Aurka), transcript variant 1, mRNA.	-2.09422	8.8856	-12.5477	2.92105e-06	0.000169128	5.05524
TC1600001320.mm.2	NM_001161623	Cdc45	cell division cycle 45	NM_001161623	RefSeq	Mus musculus cell division cycle 45 (Cdc45), transcript variant 2, mRNA.	-2.10279	8.5339	-15.1309	7.63827e-07	6.94967e-05	6.51523
TC0X00001674.mm.2	NM_001146081	Fancb	Fanconi anemia, complementation group B	NM_001146081	RefSeq	Mus musculus Fanconi anemia, complementation group B (Fancb), transcript variant 1, mRNA.	-2.10454	6.55618	-9.85277	1.60152e-05	0.000608478	3.18423
TC0600001254.mm.2	NM_001033244	Fancd2	Fanconi anemia, complementation group D2	NM_001033244	RefSeq	Mus musculus Fanconi anemia, complementation group D2 (Fancd2), mRNA.	-2.10748	6.95808	-14.1977	1.20754e-06	8.86337e-05	6.0187
TC0500000494.mm.2	NM_019438	Ncapg	non-SMC condensin I complex, subunit G	NM_019438	RefSeq	Mus musculus non-SMC condensin I complex, subunit G (Ncapg), mRNA.	-2.11627	7.73483	-17.7636	2.39217e-07	2.98429e-05	7.76211
TC1100002224.mm.2	NM_001163359	Fignl1	fidgetin-like 1	NM_001163359	RefSeq	Mus musculus fidgetin-like 1 (Fignl1), transcript variant 1, mRNA.	-2.12819	8.13962	-14.9828	8.19945e-07	7.21611e-05	6.43852
TC1700001969.mm.2	NM_001163763	Tcf19	transcription factor 19	NM_001163763	RefSeq	Mus musculus transcription factor 19 (Tcf19), transcript variant 1, mRNA.	-2.13545	7.69399	-15.5481	6.27735e-07	6.04447e-05	6.72723
TC0500001428.mm.2	NM_001042421	Kntc1	kinetochore associated 1	NM_001042421	RefSeq	Mus musculus kinetochore associated 1 (Kntc1), mRNA.	-2.15037	8.38575	-14.7558	9.15187e-07	7.63771e-05	6.31951
TC0300000935.mm.2	NM_175666	Hist2h2bb	histone cluster 2, H2bb	NM_175666	RefSeq	Mus musculus histone cluster 2, H2bb (Hist2h2bb), mRNA.	-2.15776	9.74241	-17.5472	2.61489e-07	3.18018e-05	7.66719
TC0200004547.mm.2	NM_144818	Ncaph	non-SMC condensin I complex, subunit H	NM_144818	RefSeq	Mus musculus non-SMC condensin I complex, subunit H (Ncaph), mRNA.	-2.15953	8.41414	-21.0034	7.05756e-08	1.2114e-05	9.04946
TC0700004451.mm.2	NM_001081117	Mki67	antigen identified by monoclonal antibody Ki 67	NM_001081117	RefSeq	Mus musculus antigen identified by monoclonal antibody Ki 67 (Mki67), mRNA.	-2.16061	10.8931	-17.5239	2.64023e-07	3.19495e-05	7.6569
TC0600001508.mm.2	NM_008021	Foxm1	forkhead box M1	NM_008021	RefSeq	Mus musculus forkhead box M1 (Foxm1), mRNA.	-2.17915	8.79142	-19.5889	1.17395e-07	1.78691e-05	8.51626
TC0200001748.mm.2	NM_026412	Knstrn	kinetochore-localized astrin/SPAG5 binding	NM_026412	RefSeq	Mus musculus kinetochore-localized astrin/SPAG5 binding (Knstrn), mRNA.	-2.18335	9.51233	-18.6306	1.69171e-07	2.33687e-05	8.13029
TC1000002341.mm.2	NM_007659	Cdk1	cyclin-dependent kinase 1	NM_007659	RefSeq	Mus musculus cyclin-dependent kinase 1 (Cdk1), mRNA.	-2.18347	9.39109	-18.2342	1.97814e-07	2.63049e-05	7.96432
TC1000002639.mm.2	NM_029249	Parpbp	PARP1 binding protein	NM_029249	RefSeq	Mus musculus PARP1 binding protein (Parpbp), mRNA.	-2.2156	7.91318	-15.4244	6.64988e-07	6.26228e-05	6.66499
TC1500001534.mm.2	NM_183089	Dscc1	defective in sister chromatid cohesion 1 homolog (S. cerevisiae)	NM_183089	RefSeq	Mus musculus defective in sister chromatid cohesion 1 homolog (S. cerevisiae) (Dscc1), mRNA.	-2.21584	6.49049	-12.9917	2.27984e-06	0.000142208	5.32623
TC1300001171.mm.2	NM_021790	Cenpk	centromere protein K	NM_021790	RefSeq	Mus musculus centromere protein K (Cenpk), transcript variant 1, mRNA.	-2.23131	6.74702	-13.3801	1.8472e-06	0.000121154	5.55592
TC1900001089.mm.2	NM_016692	Incenp	inner centromere protein	NM_016692	RefSeq	Mus musculus inner centromere protein (Incenp), mRNA.	-2.24475	7.74304	-11.8809	4.30502e-06	0.000228866	4.63025
TC0100001656.mm.2	NM_012012	Exo1	exonuclease 1	NM_012012	RefSeq	Mus musculus exonuclease 1 (Exo1), mRNA.	-2.24836	7.06349	-15.1152	7.69569e-07	6.94967e-05	6.50713
TC0200004366.mm.2	NM_181416	Arhgap11a	Rho GTPase activating protein 11A	NM_181416	RefSeq	Mus musculus Rho GTPase activating protein 11A (Arhgap11a), mRNA.	-2.25285	8.01408	-10.8727	8.04771e-06	0.000367492	3.94272
TC0400001639.mm.2	NM_019641	Stmn1	stathmin 1	NM_019641	RefSeq	Mus musculus stathmin 1 (Stmn1), mRNA.	-2.25356	10.2811	-18.4393	1.82363e-07	2.45198e-05	8.05066
TC1700002110.mm.2	NM_031863	Cenpq	centromere protein Q	NM_031863	RefSeq	Mus musculus centromere protein Q (Cenpq), mRNA.	-2.25455	6.38673	-16.0543	4.98033e-07	5.19543e-05	6.97669
TC1000001593.mm.2	NM_001136082	Timeless	timeless circadian clock 1	NM_001136082	RefSeq	Mus musculus timeless circadian clock 1 (Timeless), transcript variant 1, mRNA.	-2.25802	7.77423	-16.3982	4.27228e-07	4.57512e-05	7.14157
TC1100001586.mm.2	NM_001025779	Cdc6	cell division cycle 6	NM_001025779	RefSeq	Mus musculus cell division cycle 6 (Cdc6), transcript variant 2, mRNA.	-2.26811	7.38533	-16.6442	3.83564e-07	4.17417e-05	7.2573
TC0400000464.mm.2	NM_010790	Melk	maternal embryonic leucine zipper kinase	NM_010790	RefSeq	Mus musculus maternal embryonic leucine zipper kinase (Melk), mRNA.	-2.27371	8.21089	-12.93	2.35868e-06	0.000144659	5.28908
TC1200001306.mm.2	NM_133762	Ncapg2	non-SMC condensin II complex, subunit G2	NM_133762	RefSeq	Mus musculus non-SMC condensin II complex, subunit G2 (Ncapg2), mRNA.	-2.27847	8.13888	-12.6553	2.7489e-06	0.00016234	5.1217
TC0200001620.mm.2	NM_139303	Kif18a	kinesin family member 18A	NM_139303	RefSeq	Mus musculus kinesin family member 18A (Kif18a), mRNA.	-2.29825	6.56451	-12.2406	3.48404e-06	0.00019564	4.86224
TC1200000203.mm.2	NM_009104	Rrm2	ribonucleotide reductase M2	NM_009104	RefSeq	Mus musculus ribonucleotide reductase M2 (Rrm2), mRNA.	-2.3058	10.1942	-22.3662	4.45642e-08	8.84052e-06	9.52635
TC1100001155.mm.2	NM_017407	Spag5	sperm associated antigen 5	NM_017407	RefSeq	Mus musculus sperm associated antigen 5 (Spag5), mRNA.	-2.31095	7.70669	-16.7521	3.66031e-07	4.06362e-05	7.30748
TC0100001240.mm.2	NM_001278115	Ube2t	ubiquitin-conjugating enzyme E2T (putative)	NM_001278115	RefSeq	Mus musculus ubiquitin-conjugating enzyme E2T (putative) (Ube2t), transcript variant 2, mRNA.	-2.31621	7.35133	-22.5251	4.23134e-08	8.46338e-06	9.5798
TC0900000847.mm.2	NM_172453	Pif1	PIF1 5-to-3 DNA helicase homolog (S. cerevisiae)	NM_172453	RefSeq	Mus musculus PIF1 5-to-3 DNA helicase homolog (S. cerevisiae) (Pif1), mRNA.	-2.31989	5.1623	-13.8199	1.46536e-06	0.00010191	5.80824
TC0900002593.mm.2	NM_007630	Ccnb2	cyclin B2	NM_007630	RefSeq	Mus musculus cyclin B2 (Ccnb2), mRNA.	-2.3279	9.20929	-15.8991	5.34256e-07	5.4044e-05	6.90109
TC1000000158.mm.2	NM_027930	Mtfr2	mitochondrial fission regulator 2	NM_027930	RefSeq	Mus musculus mitochondrial fission regulator 2 (Mtfr2), mRNA.	-2.33055	7.01073	-14.8508	8.73878e-07	7.52655e-05	6.36954
TC0200001776.mm.2	NM_001042652	Nusap1	nucleolar and spindle associated protein 1	NM_001042652	RefSeq	Mus musculus nucleolar and spindle associated protein 1 (Nusap1), transcript variant 2, mRNA.	-2.34117	8.99036	-12.1661	3.6384e-06	0.000201503	4.81473
TC1800000291.mm.2	NM_001166406	Kif20a	kinesin family member 20A	NM_001166406	RefSeq	Mus musculus kinesin family member 20A (Kif20a), transcript variant 1, mRNA.	-2.36022	9.24413	-23.2552	3.34984e-08	7.11165e-06	9.81987
TC0200001760.mm.2	NM_011234	Rad51	RAD51 homolog	NM_011234	RefSeq	Mus musculus RAD51 homolog (Rad51), mRNA.	-2.36579	8.24631	-14.7751	9.06633e-07	7.59251e-05	6.32968
TC1300002276.mm.2	NM_175283	Srd5a1	steroid 5 alpha-reductase 1	NM_175283	RefSeq	Mus musculus steroid 5 alpha-reductase 1 (Srd5a1), mRNA.	-2.36608	7.04759	-19.3285	1.29423e-07	1.89835e-05	8.41346
TC0400003366.mm.2	NM_134471	Kif2c	kinesin family member 2C	NM_134471	RefSeq	Mus musculus kinesin family member 2C (Kif2c), transcript variant 1, mRNA.	-2.37633	8.47016	-14.7341	9.24953e-07	7.66634e-05	6.308
TC0900001101.mm.2	NM_001110265	Ttk	Ttk protein kinase	NM_001110265	RefSeq	Mus musculus Ttk protein kinase (Ttk), transcript variant 2, mRNA.	-2.3783	7.11159	-15.3195	6.98544e-07	6.45274e-05	6.61182
TC0200002232.mm.2	NM_001163476	Gins1	GINS complex subunit 1 (Psf1 homolog)	NM_001163476	RefSeq	Mus musculus GINS complex subunit 1 (Psf1 homolog) (Gins1), transcript variant 2, mRNA.	-2.38513	7.10995	-13.6734	1.58162e-06	0.000107524	5.7251
TC0400003390.mm.2	NM_023223	Cdc20	cell division cycle 20	NM_023223	RefSeq	Mus musculus cell division cycle 20 (Cdc20), mRNA.	-2.38813	7.95914	-11.454	5.57672e-06	0.000278284	4.34609
TC0500000298.mm.2	NM_007681	Cenpa	centromere protein A	NM_007681	RefSeq	Mus musculus centromere protein A (Cenpa), transcript variant 1, mRNA.	-2.39126	9.0881	-19.4138	1.25334e-07	1.86095e-05	8.44731
TC0200001741.mm.2	NM_009773	Bub1b	budding uninhibited by benzimidazoles 1 homolog, beta (S. cerevisiae)	NM_009773	RefSeq	Mus musculus budding uninhibited by benzimidazoles 1 homolog, beta (S. cerevisiae) (Bub1b), mRNA.	-2.39543	8.47638	-17.0781	3.18302e-07	3.65097e-05	7.45712
TC0100000426.mm.2	NM_001177867	Sgol2a	shugoshin-like 2a (S. pombe)	NM_001177867	RefSeq	Mus musculus shugoshin-like 2a (S. pombe) (Sgol2a), transcript variant 2, mRNA.	-2.40662	7.54296	-11.7334	4.70294e-06	0.000244776	4.53323
TC1500002217.mm.2	NM_001253808	Racgap1	Rac GTPase-activating protein 1	NM_001253808	RefSeq	Mus musculus Rac GTPase-activating protein 1 (Racgap1), transcript variant 2, mRNA.	-2.41835	9.34942	-21.8314	5.31973e-08	1.00333e-05	9.34325
TC1100001841.mm.2	NM_011943	Map2k6	mitogen-activated protein kinase kinase 6	NM_011943	RefSeq	Mus musculus mitogen-activated protein kinase kinase 6 (Map2k6), mRNA.	-2.4255	6.55127	-15.7349	5.75892e-07	5.73569e-05	6.82022
TC0300001856.mm.2	NM_009828	Ccna2	cyclin A2	NM_009828	RefSeq	Mus musculus cyclin A2 (Ccna2), mRNA.	-2.43126	9.75293	-15.5635	6.23267e-07	6.04447e-05	6.73494
TC0200003697.mm.2	NM_001199123	Spc25	SPC25, NDC80 kinetochore complex component, homolog (S. cerevisiae)	NM_001199123	RefSeq	Mus musculus SPC25, NDC80 kinetochore complex component, homolog (S. cerevisiae) (Spc25), transcript variant 1, mRNA.	-2.43759	8.45802	-10.8627	8.10034e-06	0.000369198	3.93555
TC1300002543.mm.2	NM_172301	Ccnb1	cyclin B1	NM_172301	RefSeq	Mus musculus cyclin B1 (Ccnb1), mRNA.	-2.4403	8.97087	-18.579	1.7262e-07	2.34706e-05	8.10889
TC0600001433.mm.2	NM_013538	Cdca3	cell division cycle associated 3	NM_013538	RefSeq	Mus musculus cell division cycle associated 3 (Cdca3), mRNA.	-2.45232	9.25204	-20.355	8.87365e-08	1.44134e-05	8.81018
TC1700002497.mm.2	NM_023294	Ndc80	NDC80 homolog, kinetochore complex component (S. cerevisiae)	NM_023294	RefSeq	Mus musculus NDC80 homolog, kinetochore complex component (S. cerevisiae) (Ndc80), mRNA.	-2.4531	8.23848	-17.1729	3.05778e-07	3.59245e-05	7.50005
TC1700001622.mm.2	NM_007634	Ccnf	cyclin F	NM_007634	RefSeq	Mus musculus cyclin F (Ccnf), mRNA.	-2.46457	7.64765	-11.944	4.14636e-06	0.000223497	4.67145
TC0400002527.mm.2	NM_001013377	Arhgef39	Rho guanine nucleotide exchange factor (GEF) 39	NM_001013377	RefSeq	Mus musculus Rho guanine nucleotide exchange factor (GEF) 39 (Arhgef39), mRNA.	-2.4695	6.1596	-12.5708	2.88312e-06	0.000167734	5.06954
TC0800001639.mm.2	NM_011369	Shcbp1	Shc SH2-domain binding protein 1	NM_011369	RefSeq	Mus musculus Shc SH2-domain binding protein 1 (Shcbp1), mRNA.	-2.47101	7.79937	-12.2867	3.39215e-06	0.000190923	4.89152
TC0200004568.mm.2	NM_001113179	Bub1	budding uninhibited by benzimidazoles 1 homolog (S. cerevisiae)	NM_001113179	RefSeq	Mus musculus budding uninhibited by benzimidazoles 1 homolog (S. cerevisiae) (Bub1), transcript variant 1, mRNA.	-2.48737	9.12197	-17.3424	2.84752e-07	3.38661e-05	7.5762
TC0X00000958.mm.2	NM_008446	Kif4	kinesin family member 4	NM_008446	RefSeq	Mus musculus kinesin family member 4 (Kif4), mRNA.	-2.52693	7.71436	-16.0294	5.03653e-07	5.2315e-05	6.96461
TC1100003693.mm.2	NM_011623	Top2a	topoisomerase (DNA) II alpha	NM_011623	RefSeq	Mus musculus topoisomerase (DNA) II alpha (Top2a), mRNA.	-2.54381	8.78308	-13.0367	2.22426e-06	0.000139822	5.35319
TC1700002286.mm.2	NM_028232	Sgol1	shugoshin-like 1 (S. pombe)	NM_028232	RefSeq	Mus musculus shugoshin-like 1 (S. pombe) (Sgol1), mRNA.	-2.54807	8.04433	-11.9002	4.2556e-06	0.000227519	4.64292
TC0700001122.mm.2	NM_145946	Fanci	Fanconi anemia, complementation group I	NM_145946	RefSeq	Mus musculus Fanconi anemia, complementation group I (Fanci), mRNA.	-2.57531	7.02916	-23.4317	3.16933e-08	6.84859e-06	9.87659
TC1400002150.mm.2	NM_198605	Ska3	spindle and kinetochore associated complex subunit 3	NM_198605	RefSeq	Mus musculus spindle and kinetochore associated complex subunit 3 (Ska3), mRNA.	-2.57653	6.76515	-15.5866	6.16646e-07	6.01777e-05	6.74647
TC1100002549.mm.2	NM_013552	Hmmr	hyaluronan mediated motility receptor (RHAMM)	NM_013552	RefSeq	Mus musculus hyaluronan mediated motility receptor (RHAMM) (Hmmr), mRNA.	-2.57744	8.29897	-10.7339	8.80748e-06	0.000391117	3.84341
TC1000001686.mm.2	NM_025995	Fbxo5	F-box protein 5	NM_025995	RefSeq	Mus musculus F-box protein 5 (Fbxo5), mRNA.	-2.61257	8.72667	-23.4898	3.11229e-08	6.78591e-06	9.89517
TC0900002451.mm.2	NM_024245	Kif23	kinesin family member 23	NM_024245	RefSeq	Mus musculus kinesin family member 23 (Kif23), mRNA.	-2.62961	8.86624	-14.3498	1.11856e-06	8.4598e-05	6.10183
TC0200001757.mm.2	NM_029617	Casc5	cancer susceptibility candidate 5	NM_029617	RefSeq	Mus musculus cancer susceptibility candidate 5 (Casc5), mRNA.	-2.6376	7.99253	-14.2381	1.18317e-06	8.7569e-05	6.04085
TC1900000543.mm.2	NM_001164362	Cep55	centrosomal protein 55	NM_001164362	RefSeq	Mus musculus centrosomal protein 55 (Cep55), transcript variant 1, mRNA.	-2.63784	8.63127	-14.0316	1.31401e-06	9.38362e-05	5.92684
TC0X00001276.mm.2	NM_145924	Cenpi	centromere protein I	NM_145924	RefSeq	Mus musculus centromere protein I (Cenpi), transcript variant 1, mRNA.	-2.64523	7.13583	-14.1616	1.22981e-06	8.96505e-05	5.99883
TC1100000892.mm.2	NM_011496	Aurkb	aurora kinase B	NM_011496	RefSeq	Mus musculus aurora kinase B (Aurkb), mRNA.	-2.65148	9.56123	-18.6045	1.70906e-07	2.33687e-05	8.11948
TC0900001652.mm.2	NM_010620	Kif15	kinesin family member 15	NM_010620	RefSeq	Mus musculus kinesin family member 15 (Kif15), mRNA.	-2.68861	7.98385	-15.047	7.95053e-07	7.04831e-05	6.47188
TC1900000529.mm.2	NM_010615	Kif11	kinesin family member 11	NM_010615	RefSeq	Mus musculus kinesin family member 11 (Kif11), mRNA.	-2.70141	8.20248	-18.0856	2.09947e-07	2.74656e-05	7.90104
TC1800001156.mm.2	NM_009860	Cdc25c	cell division cycle 25C	NM_009860	RefSeq	Mus musculus cell division cycle 25C (Cdc25c), mRNA.	-2.71431	7.34587	-12.1531	3.66609e-06	0.000202572	4.80642
TC0700003075.mm.2	NM_001013368	E2f8	E2F transcription factor 8	NM_001013368	RefSeq	Mus musculus E2F transcription factor 8 (E2f8), mRNA.	-2.76419	8.65947	-21.0534	6.93589e-08	1.20764e-05	9.06759
TC0900000854.mm.2	NM_026515	2810417H13Rik	RIKEN cDNA 2810417H13 gene	NM_026515	RefSeq	Mus musculus RIKEN cDNA 2810417H13 gene (2810417H13Rik), mRNA.	-2.77428	9.50349	-14.7376	9.2339e-07	7.66634e-05	6.30984
TC0100003500.mm.2	NM_023284	Nuf2	NUF2, NDC80 kinetochore complex component, homolog (S. cerevisiae)	NM_023284	RefSeq	Mus musculus NUF2, NDC80 kinetochore complex component, homolog (S. cerevisiae) (Nuf2), mRNA.	-2.82171	8.94468	-13.6469	1.60374e-06	0.000108722	5.70997
TC0800002235.mm.2	NM_146208	Neil3	nei like 3 (E. coli)	NM_146208	RefSeq	Mus musculus nei like 3 (E. coli) (Neil3), mRNA.	-2.83273	7.99421	-12.1175	3.74305e-06	0.000206354	4.78365
TC1300001205.mm.2	NM_178683	Depdc1b	DEP domain containing 1B	NM_178683	RefSeq	Mus musculus DEP domain containing 1B (Depdc1b), mRNA.	-2.8524	5.91667	-16.6507	3.82483e-07	4.17417e-05	7.26033
TC0300001587.mm.2	NM_001172092	Depdc1a	DEP domain containing 1a	NM_001172092	RefSeq	Mus musculus DEP domain containing 1a (Depdc1a), transcript variant 1, mRNA.	-2.90191	7.85016	-15.1201	7.6778e-07	6.94967e-05	6.50965
TC0100001858.mm.2	NM_010892	Nek2	NIMA (never in mitosis gene a)-related expressed kinase 2	NM_010892	RefSeq	Mus musculus NIMA (never in mitosis gene a)-related expressed kinase 2 (Nek2), mRNA.	-2.92986	7.86362	-14.533	1.02107e-06	8.10883e-05	6.20081
TC0100001303.mm.2	NM_009791	Aspm	asp (abnormal spindle)-like, microcephaly associated (Drosophila)	NM_009791	RefSeq	Mus musculus asp (abnormal spindle)-like, microcephaly associated (Drosophila) (Aspm), mRNA.	-3.01698	7.48868	-19.2111	1.35299e-07	1.96078e-05	8.3666
TC1400000940.mm.2	NM_023209	Pbk	PDZ binding kinase	NM_023209	RefSeq	Mus musculus PDZ binding kinase (Pbk), mRNA.	-3.01859	9.30631	-17.9804	2.19035e-07	2.82816e-05	7.85596
TC0200002442.mm.2	NM_027975	Fam83d	family with sequence similarity 83, member D	NM_027975	RefSeq	Mus musculus family with sequence similarity 83, member D (Fam83d), mRNA.	-3.05467	7.00174	-20.7668	7.66651e-08	1.29441e-05	8.9631
TC1400002260.mm.2	NM_028039	Esco2	establishment of cohesion 1 homolog 2 (S. cerevisiae)	NM_028039	RefSeq	Mus musculus establishment of cohesion 1 homolog 2 (S. cerevisiae) (Esco2), mRNA.	-3.19122	6.9448	-9.93246	1.51434e-05	0.000583977	3.246
TC0100001271.mm.2	NM_001287179	Kif14	kinesin family member 14	NM_001287179	RefSeq	Mus musculus kinesin family member 14 (Kif14), mRNA.	-3.21336	7.91984	-21.2061	6.57914e-08	1.16496e-05	9.12258
